# Supplementary material for: Development of a culturally and linguistically sensitive virtual reality educational platform to improve vaccine acceptance within a refugee population: the SHIFA community engagement-public health innovation programme
Source: PubMed Central journal article supplement — BMJ Open. 2021 Sep 14;11(9):e051184. doi: 10.1136/bmjopen-2021-051184 (PMC8442061; doi:10.1136/bmjopen-2021-051184), 2021-09-14
Supplement: bmjopen-2021-051184.draft_revisions.pdf [file bmjopen-2021-051184.draft_revisions.pdf]

# BMJ Open

BMJ Open is committed to open peer review. As part of this commitment we make the peer review history of every article we publish publicly available.

When an article is published we post the peer reviewers' comments and the authors' responses online. We also post the versions of the paper that were used during peer review. These are the versions that the peer review comments apply to.

The versions of the paper that follow are the versions that were submitted during the peer review process. They are not the versions of record or the final published versions. They should not be cited or distributed as the published version of this manuscript.

BMJ Open is an open access journal and the full, final, typeset and author-corrected version of record of the manuscript is available on our site with no access controls, subscription charges or pay-per-view fees (<http://bmjopen.bmj.com>).

If you have any questions on BMJ Open's open peer review process please email [info.bmjopen@bmj.com](mailto:info.bmjopen@bmj.com)

# BMJ Open

## Development of a Cultural and Linguistically Sensitive Virtual Reality Educational Platform to Improve Vaccine Acceptance within a Refugee Population: The SHIFA Community Engagement-Public Health Innovation Program

|                               |                                                                                                                                                                                                                                                                                                                                                                                                                                                                                                                                                                                                                                                                                                                                                                                                                                                                                                                                                                  |
|-------------------------------|------------------------------------------------------------------------------------------------------------------------------------------------------------------------------------------------------------------------------------------------------------------------------------------------------------------------------------------------------------------------------------------------------------------------------------------------------------------------------------------------------------------------------------------------------------------------------------------------------------------------------------------------------------------------------------------------------------------------------------------------------------------------------------------------------------------------------------------------------------------------------------------------------------------------------------------------------------------|
| Journal:                      | <i>BMJ Open</i>                                                                                                                                                                                                                                                                                                                                                                                                                                                                                                                                                                                                                                                                                                                                                                                                                                                                                                                                                  |
| Manuscript ID                 | bmjopen-2021-051184                                                                                                                                                                                                                                                                                                                                                                                                                                                                                                                                                                                                                                                                                                                                                                                                                                                                                                                                              |
| Article Type:                 | Original research                                                                                                                                                                                                                                                                                                                                                                                                                                                                                                                                                                                                                                                                                                                                                                                                                                                                                                                                                |
| Date Submitted by the Author: | 14-Mar-2021                                                                                                                                                                                                                                                                                                                                                                                                                                                                                                                                                                                                                                                                                                                                                                                                                                                                                                                                                      |
| Complete List of Authors:     | Streuli, Samantha; University of California San Diego, Anthropology<br>Ibrahim, Najla; Somali Family Service of San Diego<br>Mohamed, Alia; San Diego State University<br>Sharma, Manupriya; Palomar College<br>Esmailian, Markie; Illumesense Inc.<br>Sezan, Ibrahim; Distinct Insights LLC<br>Farrell, Carrie; San Diego State University<br>Sawyer, Mark; University of California San Diego School of Medicine<br>Meyer, Dan; The University of Texas Southwestern Medical Center<br>El-Maleh, Khaled; QUALCOMM Inc<br>Thamman, Ritu; University of Pittsburgh Department of Medicine<br>Marchetti, Alex; Miami University<br>Lincoln, Alan; Alliant International University - San Diego<br>Courchesne, Eric; University of California San Diego School of Medicine<br>Sahid, Ahmed; Somali Family Service of San Diego<br>Bhavnani, Sanjeev; Scripps Clinic La Jolla - Genesee Executive Plaza, Healthcare Innovation & Practice Transformation Laboratory |
| Keywords:                     | Paediatric infectious disease & immunisation < PAEDIATRICS, QUALITATIVE RESEARCH, Community child health < PAEDIATRICS                                                                                                                                                                                                                                                                                                                                                                                                                                                                                                                                                                                                                                                                                                                                                                                                                                           |
|                               |                                                                                                                                                                                                                                                                                                                                                                                                                                                                                                                                                                                                                                                                                                                                                                                                                                                                                                                                                                  |

SCHOLARONE™  
Manuscripts

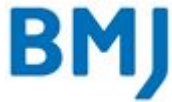

I, the Submitting Author has the right to grant and does grant on behalf of all authors of the Work (as defined in the below author licence), an exclusive licence and/or a non-exclusive licence for contributions from authors who are: i) UK Crown employees; ii) where BMJ has agreed a CC-BY licence shall apply, and/or iii) in accordance with the terms applicable for US Federal Government officers or employees acting as part of their official duties; on a worldwide, perpetual, irrevocable, royalty-free basis to BMJ Publishing Group Ltd ("BMJ") its licensees and where the relevant Journal is co-owned by BMJ to the co-owners of the Journal, to publish the Work in this journal and any other BMJ products and to exploit all rights, as set out in our [licence](#).

The Submitting Author accepts and understands that any supply made under these terms is made by BMJ to the Submitting Author unless you are acting as an employee on behalf of your employer or a postgraduate student of an affiliated institution which is paying any applicable article publishing charge ("APC") for Open Access articles. Where the Submitting Author wishes to make the Work available on an Open Access basis (and intends to pay the relevant APC), the terms of reuse of such Open Access shall be governed by a Creative Commons licence – details of these licences and which [Creative Commons](#) licence will apply to this Work are set out in our licence referred to above.

Other than as permitted in any relevant BMJ Author's Self Archiving Policies, I confirm this Work has not been accepted for publication elsewhere, is not being considered for publication elsewhere and does not duplicate material already published. I confirm all authors consent to publication of this Work and authorise the granting of this licence.

1  
2  
3 **Development of a Cultural and Linguistically Sensitive Virtual Reality Educational Platform to Improve**  
4 **Vaccine Acceptance within a Refugee Population: The SHIFA Community Engagement-Public Health**  
5 **Innovation Program**  
6  
7  
8

9  
10 **Author Block:** Samantha A. Streuli MA<sup>1</sup>, Najla Ibrahim MPH<sup>2</sup>, Alia Mohamed<sup>3</sup>, Manupriya Sharma PhD<sup>4</sup>,  
11  
12 5 Markie Esmailian<sup>5</sup>, Ibrahim Sezan PhD<sup>6</sup>, Carrie Farrell MPA<sup>7</sup>, Mark Sawyer MD<sup>8</sup>, Dan Meyer MD<sup>9</sup>, Khaled  
13  
14 El-Maleh<sup>10</sup>, Ritu Thamman MD<sup>11</sup>, Alex Marchetti<sup>12</sup>, Alan Lincoln PhD<sup>13</sup>, Eric Courchesne<sup>14</sup>, Ahmed Sahid<sup>2</sup>,  
15  
16 Sanjeev P. Bhavnani MD<sup>15</sup>  
17  
18

19  
20 **Affiliations:** 1) Department of Anthropology, University of California San Diego 2) Somali Family Service  
21  
22 of San Diego 3) San Diego State University 4) Palomar College 5) Illumesense Inc. 6) Distinct Insights, LLC  
23  
24 10 7) San Diego State University 8) UC San Diego School of Medicine 9) University of Texas Southwestern  
25  
26 Medical Center 10) Qualcomm Inc. 11) Department of Medicine University of Pittsburgh 12) Miami  
27  
28 University 13) Alliant International University 14) UC San Diego School of Medicine 15) Scripps Clinic,  
29  
30 Healthcare Innovation & Practice Transformation Laboratory  
31  
32  
33

34 **Author for Correspondence:** Samantha Streuli  
35  
36

37 15 **Affiliation:** Department of Anthropology, University of California, San Diego  
38  
39

40 **Address:** 9500 Gilman Dr. #0532 La Jolla, CA 92093  
41  
42

43 **Phone:** (858) 952-6238  
44  
45

46 **Email:** sstreuli@ucsd.edu  
47  
48

49 **Keywords:** vaccination, refugee health, community engagement, virtual reality, education  
50  
51

52 20 **Manuscript Word Count:** 4502  
53  
54

55 **Figures and Tables:** 6  
56  
57  
58  
59  
60

1  
2  
3  
4  
5  
6  
7  
8  
9  
10  
11  
12  
13  
14  
15  
16  
17  
18  
19  
20  
21  
22  
23  
24  
25  
26  
27  
28  
29  
30  
31  
32  
33  
34  
35  
36  
37  
38  
39  
40  
41  
42  
43  
44  
45  
46  
47  
48  
49  
50  
51  
52  
53  
54  
55  
56  
57  
58  
59  
60

**Number of References: 23**

For peer review only

1  
2  
3 25 **ABSTRACT**  
4  
5

6 **Objectives:** To combat misinformation, engender trust, and increase health literacy, we developed a  
7 culturally and linguistically appropriate virtual reality (VR) vaccination education platform using  
8 community-engaged approaches within a Somali refugee community.  
9  
10

11 **Design:** Community based participatory research (CBPR) methods including focus group discussions,  
12  
13 30 interviews, and surveys were conducted with Somali community members and expert advisors to design  
14 the educational content. Co-design approaches with community input were employed in a phased  
15 approach to develop the VR storyline.  
16  
17

18 **Participants:** 60 adult Somali refugees and 7 expert advisors who specialize in healthcare, autism  
19 research, technology development, and community engagement.  
20  
21

22 **Setting:** Somali refugees participated at the offices of a community-based organization, Somali Family  
23 Service, in San Diego, California, as well as at a community health fair and online. Expert advisors  
24 responded to surveys virtually.  
25  
26 35

27 **Results:** We find that a CBPR approach can be effectively used for the co-design of a VR educational  
28 program. Additionally, cultural and linguistic sensitivities can be incorporated within a VR educational  
29 program and are essential factors for effective community engagement. Finally, effective VR utilization  
30 requires flexibility so that it can be used among community members with varying levels of health and  
31 technology literacy.  
32  
33 40

34 **Conclusion:** We describe using community co-design to create a culturally and linguistically sensitive VR  
35 experience promoting vaccination within a refugee community. Our approach to VR development  
36 incorporated community members at each step of the process. Our methodology is potentially  
37 applicable to other populations where cultural sensitivities and language are common health education  
38 barriers.  
39  
40  
41  
42  
43  
44  
45  
46  
47  
48  
49  
50  
51  
52  
53  
54  
55  
56  
57  
58  
59  
60

1  
2  
3  
4  
5  
6  
7  
8  
9  
10  
11  
12  
13  
14  
15  
16  
17  
18  
19  
20  
21  
22  
23  
24  
25  
26  
27  
28  
29  
30  
31  
32  
33  
34  
35  
36  
37  
38  
39  
40  
41  
42  
43  
44  
45  
46  
47  
48  
49  
50  
51  
52  
53  
54  
55  
56  
57  
58  
59  
60

**List of Abbreviations:**

50 CBPR: Community based participatory research

CHW: Community health worker

MMR: Measles, mumps, and rubella vaccination

SFS: Somali Family Service

VR: Virtual reality

55

For peer review only

## ARTICLE SUMMARY

### Strengths and Limitations of this Study

- Community based participatory research plays an important role in the creation and customization of necessary health interventions for vulnerable populations. The qualitative aspects of this study provide in-depth information that can help to address complex vaccine hesitancy issues among Somali refugees.
- This study uses community co-design in the development of a virtual reality health education for Somali refugees. Community-engagement methods such as community co-design are novel and effective strategies that employ the community itself for refugee health promotion and for new technology development.
- This project is a pilot study with a small sample size which will need to be expanded to truly understand the effect of our virtual reality health innovation on refugee vaccine perceptions and behaviors.



## INTRODUCTION

Over 300,000 refugees enter the United States every year. While refugee resettlement has increased over time, events as recent as 2015 mark one of the largest exoduses of forced human migration, sparking a crisis as countries struggle to cope with the influx and the social and economic demands that coincide with human resettlement [1]. What is largely missing in the public discussion is an appreciation that refugees face extraordinary challenges throughout their migration process from origination to destination. One challenge in particular – the access to proper healthcare - is critical, both for those that have been resettled in the past and those who have recently arrived [2]. The other challenge is to collect and monitor healthcare data that can be accessed and disseminated to resettled communities for public health monitoring [3]. In recognition of these challenges, important questions range from how to efficiently meet the healthcare demands of a growing population that is effective and sustainable to providing an engagement that uses culturally specific resources that simultaneously enhances health education and drives an increased level of trust in the local healthcare system [4].

Upon resettlement in Western countries, many Somali refugees were faced with the widespread diagnosis of autism, a developmental disorder which was unfamiliar to them prior to migration [5]. On one hand, among a community cluster of resettled Somali children in Minneapolis, the prevalence of autism has exceeded 3% and has eclipsed the national average of 1.9% [6]. On the other hand, this specific refugee community was targeted by anti-vaccination activists and the propaganda that vaccination is a cause of autism. This misinformation led to concern by Somali parents and distrust in the healthcare system, which has resulted in a propensity for vaccine hesitancy and non-acceptance [5,6,7]. A lack of effective messaging towards what does cause autism and the dissemination of anti-vaccination propaganda were successful in decreasing vaccination rates in the Somali refugee population in Minnesota from 92% to 42% over the span of a decade [7,8].

1  
2  
3 Effective healthcare education relies on various principles for building essential skills, including  
4  
5 95 communication, assessing the accuracy of information, decision making, planning, goal setting, and self-  
6  
7 management [9]. At its core, health education must be simple, retained, and must be assimilated within  
8  
9 those factors relevant to a given individuals biases and acceptances towards the delivered message [9].  
10  
11 New digital innovations such as virtual reality (VR) has emerged as a tool to provide an enriching and  
12  
13 immersive learning experience that promotes absorption in both acute conditions such as anxiety and  
14  
15 post-traumatic stress disorder, and chronic conditions such as tobacco cessation as well as for medication  
16  
17 100 compliance [10-13]. The ability for VR to increase information retention and to change health behaviors  
18  
19 by engaging users in a non-healthcare environment makes VR a potentially valuable platform for visual  
20  
21 health education. Therefore, our primary aim was to develop a customized, culturally and linguistically  
22  
23 appropriate VR educational program specifically focused on pediatric vaccinations, and to leverage  
24  
25 community based participatory research models and community co-designs to build, test, and deploy VR  
26  
27 105 at the community level among a group that are known to be vaccine hesitant or vaccine resistant.  
28  
29  
30  
31  
32  
33

#### 34 **METHODS: STUDY DESIGN**

35  
36 SHIFA (Arabic for 'healing') is a community innovation program to design, deploy, and utilize new  
37  
38 110 healthcare innovations with an inclusive model of community engagement. Within the current program,  
39  
40 community based participation was incorporated along three complementary approaches [14]. These  
41  
42 include:  
43  
44  
45

- 46 1) To define the health care access barriers in a resettled refugee community with a focus on  
47  
48 pediatric vaccination.  
49
- 50  
51 115 2) Incorporate a community-based participatory model to develop the virtual reality content  
52  
53 with community member co-design.  
54
- 55 3) Develop a virtual reality technology that is customized with cultural, linguistic, and religious  
56  
57

1  
2  
3 sensitivities to provide appropriate health education.  
4

5 Qualitative feedback was derived through focus group discussions, interviews, and surveys developed by  
6  
7  
8 120 the investigators and was completed by community members and experts for analysis during each phase  
9  
10 of technology development. Focus groups and interviews were conducted by Najla Ibrahim and Samantha  
11  
12 Streuli. Najla Ibrahim is a Somali woman who holds an MPH degree and is an expert in community public  
13  
14 health issues. Samantha Streuli is a white woman who is a PhD candidate in anthropology at UC San Diego  
15  
16 and who has been working with the Somali community for three years. The majority of focus group and  
17  
18  
19 125 interview participants were unknown to Samantha and Najla prior to the research project, though some  
20  
21 were acquaintances from previous work within the Somali community.  
22  
23  
24

### 25 ***Ethics Approval Statement***

26  
27  
28 This study was approved by The University of California San Diego Institutional Review Board (Protocol  
29  
30 130 #171434).  
31  
32  
33

### 34 ***Patient and Public Involvement***

35  
36  
37 The Somali community was involved in the research from its inception and were regularly consulted as  
38  
39 the research was developed. Focus groups and interviews with the community informed the development  
40  
41 135 of research questions, which prioritized the experiences and interests of the Somali community. We  
42  
43 consulted with community members and community leaders when designing and conducting the study  
44  
45 and developing survey, focus group discussion, and interview questions to determine outcome measures.  
46  
47 Somali community members were also involved in the recruitment to the study, as much of the  
48  
49 recruitment happened via word-of-mouth. The results of the study will be presented to participants and  
50  
51  
52 140 other community members, who will be further consulted via focus groups on how to best disseminate  
53  
54 results.  
55  
56  
57  
58  
59  
60

## **Participants**

### *Inclusion/Exclusion Criteria*

145 We identified groups of Somali individuals for community participation and VR co-design. Participants  
11 were required to be members of the Somali community in San Diego, California who were over the age of  
12 18 and were either 1) Somali refugees; 2) Somali immigrants; or, 3) US-born Somali Americans. We  
13 14 15 16 17 18 19 20  
21 150 community and in pediatric health; 3) leaders within the Somali community.

### **Setting**

27 San Diego County is the 3<sup>rd</sup> largest metropolitan area in California and the 12<sup>th</sup> largest resettlement area  
28 29 30 31 in the United States. The organization responsible for the development and execution of the program is  
32 155 Somali Family Services (SFS), a fiscal sponsor for the East African Collaborative of 8-community  
33 34 35 36 37 38 organizations that aims to outreach, educate, and enroll refugees and immigrants in health insurance  
39 40 41 42 43 44 45 programs. This specific community predominantly resides in City Heights, a subdivision of San Diego  
46 47 48 County that has a population of 75,000 individuals. Socioeconomic statistics of this region includes a  
49 50 51 52 53 54 55 median household income of \$39,330 (national median \$55,322), 40% are immigrants and/or refugees,  
56 160 with 31% having an education level of a bachelor's degree or greater [15].

### **Recruitment**

59 Somali individuals were recruited via telephone and through word-of-mouth by Somali Community Health  
60 Workers (CHWs) and peers. Our target participants were: a) parents of children between 0-2 years of age,  
b) pregnant, or c) planning to become pregnant in the next two years; however, we included those Somali  
community members interested in issues of autism and/or vaccination regardless of parental status. All

1  
2  
3 participants consented to have their names and contact information collected for future  
4  
5 correspondences. This information was securely stored in an encrypted file and only used to re-contact  
6  
7 participants who agree to be re-contacted. The research objectives, research participants' rights, and  
8  
9 description of how data would be used were explained to all participants prior to participation. All  
10  
11  
12 170 participants provided verbal consent, which was approved by The University of California San Diego  
13  
14 Institutional Review Board (#171434).  
15

16  
17  
18  
19 Expert advisors were identified by the SHIFA project leadership team according to their particular areas  
20  
21 of specialization. Advisors signed consent forms to participate in the iterative development of educational  
22  
23 175 content.  
24  
25

### 26 27 28 ***CBPR and Community Co-Design***

29  
30  
31 Our CBPR approach involved community members in each step in the design, iterative testing, and  
32  
33 development of culturally and linguistically appropriate health education content. This approach to CBPR  
34  
35 180 in the Somali community builds upon public health work previously done within refugee communities  
36  
37 [16]. We developed a community co-design methodology that uses the principles of design thinking  
38  
39 combined with community-based research to enable participants to be directly involved in the design and  
40  
41 creation of content and products that are developed to benefit them [16-17]. This co-design methodology  
42  
43 was inclusive in that community members were asked to participate within content curation and to lead  
44  
45  
46 185 certain aspects of VR development.  
47  
48  
49

### 50 51 ***Phased Approach to Virtual Reality Development***

52  
53  
54 We merged each aspect of CBPR and community co-designs within a phased approach to VR development  
55  
56 (Vendor: INVIVO, Toronto, Canada). These phases included:  
57  
58  
59

1  
2  
3 190 **Phase 1:** CBPR approaches to assess community needs and concerns important to pediatric vaccination.  
4  
5

6 **Phase 2:** VR modality determination for script development. The modality consisted of the type of VR  
7  
8 experience and the script development included the specific educational content.  
9

10  
11 **Phase 3:** VR Prototype and iterative feedback from storyboards, 2- and 3-dimensional animation, and  
12  
13 visual and audio experiences that incorporate VR design elements including those factors that allow users  
14  
15  
16 195 to engage at different levels of health literacy.  
17

18 **Phase 4:** Final VR Product and Testing  
19

20  
21 The objective within VR development was to use those tools and devices that were available to the  
22  
23 community-at-large and to ensure cultural and linguistic sensitivities were incorporated.  
24  
25  
26  
27  
28

29  
30 200 ***Data Collection and Analysis***  
31

32 All data were collected electronically via tablet or computer at the time of focus group discussions,  
33  
34 interviews, and surveys. Focus group discussions and interviews were either recorded and transcribed, or  
35  
36 extensive notes were taken on a computer in the event that groups or individuals declined to be recorded.  
37

38  
39 Analyses were conducted thematically and iteratively using the content of the surveys, focus group  
40  
41 205 discussions, and interviews during the phased approach for VR development. This approach utilized five  
42  
43 steps: 1) familiarization, 2) coding, 3) theme development, 4) defining themes and, 5) reporting (Miles &  
44  
45 Huberman, 1994) [18]. During the process of familiarization, all sections of the interviews, focus group  
46  
47 discussions, and surveys relating to the experience of utilizing VR were extracted. Coding was performed  
48  
49 using MAXQDA software. Emergent themes from each phase of development were defined and reported  
50  
51  
52  
53 210 in order to inform the subsequent development phases.  
54  
55  
56  
57  
58  
59  
60

1  
2  
3 The primary data coder was SAS. To ensure a rigorous evaluation of the data, a subset of transcripts was  
4 also coded by AM. In order to achieve consensus on codes, AM and SAS engaged in recurring discussions  
5 on the coding process. The analysis was further tested during discussions with expert advisors. The  
6 consensus was reviewed and approved by all investigators. Specific quotations were chosen by SAS to  
7 represent emergent themes in the data.  
8  
9  
10  
11  
12 215

## 16 RESULTS

17 This program began in April 2019 and product testing is ongoing. Figure 1 illustrates the phased approach  
18 to development and iterative testing. In total, 67 individuals (7 advisors, 60 Somali community members)  
19 provided feedback during each phase of VR development and participated within the community-co  
20 design.  
21  
22 220  
23  
24  
25  
26  
27  
28  
29  
30

### 31 *Community-based Participation*

32 The first step in our community engagement process was to hold a series of 3 focus groups exploring  
33 topics of interest to the Somali community including vaccination, autism, pediatric health, and technology  
34 (n = 18 Somali community members). Based on this initial feedback from the community, the project team  
35 held a design workshop to create a series of 3 story ideas for the VR. These ideas were then brought to  
36 the Somali community in the form of another design workshop where the community evaluated the  
37 suitability of the provided stories and suggested changes. 4 Somali community members (2 Somali  
38 community health workers, 1 Somali woman, and 1 Somali man) participated in this design workshop to  
39 develop the general framework of a story. Information learned from the community was then used to  
40 develop a first iteration of a script. This script was then tested for cultural and linguistic suitability and  
41 vaccine-promotion potential with 17 Somali women from ages 26-78 and was followed by a discussion  
42 with a prominent male community leader to again assess the cultural and linguistic appropriateness of  
43  
44  
45  
46 230  
47  
48  
49  
50  
51  
52  
53  
54  
55  
56  
57  
58  
59  
60

1  
2  
3 235 the content to promote vaccine education. Finally, a 2-dimensional prototype of the VR animation was  
4  
5 developed with a Somali voiceover (Figure 2) and was tested with 24 community members in order to  
6  
7 determine the effectiveness of the messaging in promoting vaccination and to assess cultural and  
8  
9 linguistic elements of the storyline.  
10  
11  
12  
13

#### 14 240 ***Phased Approach to Virtual Reality Technology Development***

17 ***Phase 1:*** CBPR approaches to assess community needs and concerns important to pediatric vaccination

19  
20 The Somali community focus group discussions were broken up into three separate sessions, each of  
21  
22 which focused on a particular area of community interest (Table 1). The first focus group discussion was  
23  
24 centered on health concerns of the community, and participants cited autism as a major concern, as  
25  
26 245 well as language barriers that pose a significant problem when engaging with the medical system. In  
27  
28 addition, participants brought up issues of trust which were tied to poor communication.  
29  
30  
31  
32

33 The second focus group discussion explored issues of pediatric health. Participants provided information  
34  
35 about pregnancy, childbirth, pediatric care, and parenting. The central theme of this focus group  
36  
37 250 discussion was issues of trust within the medical system, with many mothers indicating that while they  
38  
39 highly valued their doctors' opinions, they also preferred to do their own research. Mothers relayed to  
40  
41 us their desire to receive health education in their own language from a trustworthy doctor.  
42  
43  
44  
45

46  
47 The third focus group discussion was centered around issues of vaccination and technology. Participants  
48  
49 255 once again indicated issues surrounding trust in medical systems and their desire to make their own  
50  
51 educated health decisions. Additionally, participants stated that they would like to receive more  
52  
53 detailed information about how vaccinations work:  
54  
55  
56  
57  
58  
59  
60



1  
2  
3 “If they could show how the vaccine works in the child’s body and what it does – if it can be  
4  
5 260 visualized.”  
6  
7  
8  
9

10 “That before the vaccines are given to our children, for it to be explained to us what the risks are  
11  
12 - the sided effects, and the benefits. When we compare the two, then make a decision.”  
13  
14  
15

16 265 Themes that emerged from interviews with 3 Somali parents also included concerns about autism,  
17  
18 medical trust, and the desire to learn more about vaccination.  
19  
20  
21  
22  
23

#### 24 **Phase 2:** VR modality determination for script development 25

26  
27 *Modality determination:* The project team consulted extensively with Somali CHWs to determine an  
28  
29 270 appropriate modality, and chose 360-video due to the ability of this format to be experienced using virtual  
30  
31 reality headsets, smart phones, or computers in order to make this VR program widely accessible to all  
32  
33 members of the Somali community.  
34  
35

36  
37 *Script development:* Open-ended survey responses from Somali community members regarding the  
38  
39 three potential storylines indicated that an older Somali male doctor would be most suitable to deliver  
40  
41 275 health information in our story, as this character would evoke feelings of trust and respect. Somali  
42  
43 community members favored a scene where a Somali mother could be shown talking to her doctor –  
44  
45 this way they could see themselves as a character in the VR story and could see their questions and  
46  
47 concerns being addressed directly. The open-ended survey responses from community advisors  
48  
49 indicated a preference for a storyline with a strong focus on family and supported the story concept of a  
50  
51 Somali mother asking questions to a trusted physician. This information was used to develop the initial  
52 280  
53 script.  
54  
55  
56  
57  
58  
59  
60

1  
2  
3  
4  
5 Six members of the expert advisory board reviewed the initial script. Advisors were asked to answer a  
6 series of six open-ended questions and provided insightful answers that assisted with script  
7  
8  
9  
10 285 development (Table 2). Specifically, when advisors were asked for their overall impressions of the story,  
11 they stated:  
12  
13

14  
15  
16  
17 “Overall, I like how the story flows and the way in which the educational components are  
18 presented.”  
19

20  
21 290  
22  
23 “I like the simplicity of the conversation with its effective focus on the key messaging of the  
24 value of the timely vaccination to help raise healthy kids.”  
25  
26  
27  
28  
29

30 We conducted a community focus group discussion during the script review process to engage the  
31  
32 295 community. Community members were asked to assess how culturally appropriate the storyline was,  
33 what they would like to change, how impactful the story was, and how they would personally design the  
34 content. During this focus group discussion, participants agreed that the story was clear and easy-to-  
35 follow; however, as additional questions were asked about story flow, the feedback turned to autism.  
36  
37  
38 We found that even when we did not mention autism, the false association between autism and the  
39  
40  
41  
42  
43 300 measles, mumps, and rubella vaccine (MMR) came up as a topic of discussion. Many community  
44 members said that they were concerned about autism and the MMR vaccination. One woman asked:  
45  
46

47  
48 “if MMR doesn’t cause autism, why did I see my child stop talking immediately after getting the  
49 MMR?”  
50  
51  
52  
53  
54  
55  
56  
57  
58  
59  
60

1  
2  
3 305 The participants agreed that the VR must address the autism question, and that they would prefer to  
4  
5 learn this information from a doctor character in the VR storyline.  
6  
7

8  
9  
10 Community members were also asked to take a brief survey after reviewing the script. This survey  
11  
12 included questions about attitudes toward vaccination as well as vaccination planning. Notably, there  
13  
14 310 was an 18% increase in participants who endorsed being “very comfortable” with MMR vaccination  
15  
16 following script exposure. Additionally, those who said they were “not at all comfortable” with MMR  
17  
18 vaccination decreased by 12% following script exposure. There was also a 17% increase in those who  
19  
20 stated they would allow their child to receive the MMR following script exposure (Table 3).  
21  
22  
23  
24

25  
26 315 **Phase 3: VR Prototype and iterative feedback**

27  
28 Three expert advisors provided feedback on the storyboard and prototype that focused on where  
29  
30 characters were positioned (i.e. husband next to wife), color scheme, and highlighted the need to describe  
31  
32 the immune system’s function in order to retain scientific accuracy in the communication of vaccination  
33  
34 information.  
35  
36

37 320  
38  
39  
40 The prototype (Figure 2) was tested with the Somali community in the context of an in-person focus group  
41  
42 discussion and surveys that took place both in-person and online. Participants in the focus group  
43  
44 discussion were asked a series of open-ended questions about their experience with the prototype. The  
45  
46 primary focus of this discussion was analysis of the storyboards and stylistic elements of the VR experience  
47  
48 (e.g., color preferences, imagery, portrayal of characters). Participants indicated that they highly valued  
49 325  
50 the Somali voiceover and preferred to include the discussion of autism in the final VR storyline, as its  
51  
52 exclusion would raise more questions for the community. The participants also felt that the father  
53  
54  
55  
56  
57  
58  
59  
60

1  
2  
3 character in the VR storyline seemed somewhat excluded and should be standing near his wife to signal  
4 support.  
5  
6

7  
8 330 All participants who reviewed the prototype agreed that the inclusion of culturally appropriate characters  
9 and a Somali voiceover maximized the educational experience. 13/24 (54%) participants stated that the  
10 prototype made them either more comfortable or much more comfortable with vaccination than they  
11 were before exposure to the prototype. 20/24 (83%) participants stated that they would recommend  
12 MMR vaccination to members of their community following exposure to the prototype. Additionally,  
13 335 21/24 (88%) said they planned to vaccinate their children following exposure to the prototype.  
14  
15  
16  
17  
18  
19  
20  
21  
22  
23  
24

25 *VR design factors:* The key VR design elements that were incorporated within each phase of VR  
26 development include passive, non-intrusive experiences, a dynamic and interactive visualization, and  
27 prompts that promote the user towards self-reflection.  
28  
29  
30  
31

32  
33 340

#### 34 **Phase 4: Final Product and Testing**

35  
36  
37  
38 The final product is a four minute 360-video animation (<https://youtu.be/NS8GvtxnIk0>) available in Somali  
39 and English languages. It can be viewed online using a tablet, a smart phone, or with VR goggles. Settings  
40 include a Somali home populated by a family, and a doctors' office. In the animation's introduction, we  
41 meet the expectant mother who states that she is expecting her first child and is trying to make decisions  
42 about vaccination. Figure 3 illustrates in screenshots each of the 4 chapters in the VR experience. We plan  
43 to test the final product using an A/B testing model with the Somali community wherein the A group  
44 receives the VR education and the B group receives a basic English-language educational video about  
45 345  
46  
47  
48  
49  
50  
51  
52  
53  
54  
55  
56  
57  
58  
59  
60

1  
2  
3 vaccination. Both groups will be surveyed before and after exposure to the educational materials to assess  
4  
5 350 changes in attitude toward vaccination and willingness to vaccinate.  
6  
7  
8  
9

## 10 11 **DISCUSSION** 12 13

14 The main results of the SHIFA program can be summarized as follows: 1) a community  
15 participatory research model can be effectively translated for the co-design of a VR educational program  
16  
17 355 with community members involved in each phase of technology development; 2) cultural and linguistic  
18 sensitivities can be incorporated within a VR pediatric immunization educational program and are  
19 essential factors for effective community engagement; and 3) effective VR utilization requires flexibility  
20 that can be used among community members with varying levels of health and technology literacy. To  
21 the best of our knowledge, our VR development is the first such health innovation for vaccination  
22  
23 360 education designed by a community of refugees known for vaccine hesitancy.  
24  
25  
26  
27  
28  
29  
30  
31  
32  
33  
34  
35

### 36 ***Refugee Learners – Vaccination & Autism*** 37

38 This community has common barriers to effective education such as a lack of information and  
39 information that is not culturally and/or linguistically appropriate to drive understanding [19]. Regarding  
40  
41 365 immunizations, many parents and caregivers in this community already possess medically inaccurate  
42 information. We have previously determined that within this refugee community the reason not to  
43 immunize has resulted from misinformation and the perception that vaccination results in autism.  
44  
45 Although MMR vaccination rates have fallen in the Somali community (from 92% to 42% over the span of  
46  
47 a decade [7,8]) rates of autism and pediatric learning impairments have remained high (1:32 Somali  
48  
49 370 children have autism compared to the national average of 1:54) [20-21]. While these results do not  
50  
51  
52  
53  
54  
55  
56  
57  
58  
59  
60

1  
2  
3 support the link between vaccination and autism, many parents are still convinced of an association  
4  
5 between MMR and autism. Given these results, it is important to take into consideration the mental and  
6  
7 emotional state and the ideation that arises from associating vaccinations with autism. Within this  
8  
9 community health engagement related to immunization requires education focused on the importance  
10  
11 of vaccinations for newly arrived refugees, and a re-education among those who have previously elected  
12 375 not to immunize. In this context, we performed a community health assessment and identified the drivers  
13  
14 for a low rate of vaccination in the Somali community ranging from cultural and language barriers, distrust  
15  
16 in the healthcare system, and the misinformation that vaccination results in autism. Recognizing these  
17  
18 drivers for low immunization rates in this community, our observations for the mechanisms for how VR  
19  
20 affects behavior changes include: content that is culturally relevant, stimulates an awareness and  
21  
22 expectation for what vaccines do and do not do, and provides an immersive experience leading to  
23 380 information retention [22].  
24  
25  
26  
27  
28  
29  
30  
31  
32

### 33 ***VR CBPR and Co-Designs***

34  
35  
36 385 In addition to the mechanisms for how VR affects behavioral change, several design factors must  
37  
38 be maintained when considering who interacts with the VR technology and especially among immigrants  
39  
40 that may have varying levels of health and digital literacy. Within our program, most community members  
41  
42 experienced a positive interaction with VR. There are several plausible reasons for our observations.  
43  
44 Through community co-designs, we leveraged key design factors including a non-intrusive experience  
45  
46 (users learn in their own environment), a passive interaction (content that is visual, audio, and depicted  
47 390 versus reading), a dynamic storyline that builds upon previous experiences and uses known environments,  
48  
49 and promotes self-reflection by allowing the user to introspect and contemplate during the VR experience.  
50  
51  
52  
53  
54  
55  
56  
57  
58  
59  
60

1  
2  
3  
4  
5  
6 395  
7  
8  
9  
10  
11  
12  
13  
14  
15  
16  
17 400  
18  
19  
20  
21  
22  
23  
24  
25  
26  
27  
28 405  
29  
30  
31  
32  
33  
34  
35  
36  
37  
38  
39

Because we recognized the importance of culturally and linguistically appropriate educational materials to deal with issues of low health literacy and medical distrust, we included community-based approaches in each phase of our development. The results of focus groups and surveys conducted within the community revealed several important considerations for the development of our VR storyline. For instance, community members were much more comfortable receiving information from a trusted doctor character. Community members also felt it necessary to include direct and clear information about the lack of relationship between autism and vaccination in our storyline. This was in contrast to our expectation and that doing so would reinforce this misinformation. Following design workshops with the Somali community, we tested the program that they helped to co-design within the community in order to address its cultural and linguistic appropriateness as well as its ability to promote vaccination behavior. We also tested the VR storyline with a team of subject matter experts who evaluated the scientific accuracy and usability of our design. In our community testing, we found that many Somali community members felt the VR storyline engendered trust, was relatable, was educational, and was convincing. Several focus group and survey participants stated that they planned to vaccinate and to recommend vaccination to others following exposure to the VR. Our testing with our panel of experts found that our content was user-friendly, easy to understand, and scientifically accurate.

40 410  
41  
42  
43  
44  
45  
46  
47  
48  
49  
50  
51 415  
52  
53  
54  
55  
56  
57  
58  
59

While we appreciate that community co-designs are an important methodology for how a new technology is designed, a foundation of CBPR is necessary to harness community involvement. To employ CBPR, we engaged community members throughout every step of the process. Before developing the idea for the VR storyline, we engaged the community in a series of three focus groups to better understand their needs, strengths, and interest in collaboration. Focus group discussion questions were open-ended and allowed for participants to bring their interests and concerns into the conversation. Information learned from these engagements was used to begin to develop the culturally and linguistically appropriate

1  
2  
3 storyline for the VR. Community members were also continuously engaged throughout the development  
4  
5 of the VR storyline through community co-design.  
6  
7  
8  
9

10 420 It is our plan to leverage the educational curriculum as well in future deployments of VR. Due to  
11  
12 the constraints of COVID-19, we are currently exploring the possibilities of using telehealth and other  
13  
14 digital communication platforms to safely and effectively deploy the VR into the community. Addressing  
15  
16 vaccine hesitancy is especially relevant within the context of COVID-19, as vaccination rates for  
17  
18 preventable diseases have dropped significantly since the beginning of the COVID-19 crisis [23]. There are  
19  
20  
21 425 also concerns about the potential of misinformation related to COVID-19 vaccination that is especially  
22  
23 relevant for an underserved community that is largely excluded from vaccine clinical trials and  
24  
25 communities that have a history of vaccine hesitancy.  
26  
27  
28  
29  
30

### 31 **Limitations**

32 430  
33  
34 Our community feedback and focus group may represent a convenience sample for those that are  
35  
36 more apt towards vaccine acceptance, and therefore may not completely capture all concerns among  
37  
38 those who are vaccine hesitant. While this represents a potential selection bias, our method to include a  
39  
40 wide range of community members as well as internal and external advisors may enhance internal validity  
41  
42  
43 435 by incorporating a heterogenous group for community input. Community based participation and  
44  
45 community co-designs at each stage of VR development from the initial idea through completion of a VR  
46  
47 animation may enhance external validation by including the key components related to cultural and  
48  
49 linguistic sensitivities within the phased approach for VR development. Finally, a perceived shift from  
50  
51 vaccine hesitancy to vaccine acceptance at this point is subjective and requires real-world validation and  
52  
53  
54 440 prospective follow-up confirming vaccine delivery.  
55  
56  
57  
58  
59  
60



## CONCLUSION

We employed community-based participatory approaches, and community co-design to develop an innovative vaccine educational technology with Somali refugees using VR. By combining new technology-enabled approaches with the needs, interests, and expertise of Somali community members, we have created a methodology that can address vaccination beliefs and behaviors in a vaccine hesitant refugee population. Future research will include an assessment of the efficacy of the VR platform on vaccination rates over time, as well as continued community engagement for the development of additional VR content which can increase health literacy within underserved populations.

## ACKNOWLEDGEMENTS

We first extend our sincerest gratitude to the Somali community for their inspiring engagement in this project. Next, we would like to thank Fadumo Jama, Ahmed Dahir, and Sahra Nor for their assistance with participant recruitment, facilitation of community engagements, and translation and interpretation services. Finally, we are grateful to Dr. Ahmad Bailony and Karen Henken for their guidance and input on this project.

## CONTRIBUTORSHIP STATEMENT

Samantha Streuli and Sanjeev Bhavnani had full access to all of the data in the study and took responsibility for the integrity of the data and the accuracy of the data analysis. All authors agree to be accountable for all aspects of the work in ensuring that questions related to the accuracy or integrity of any part of the work are appropriately investigated and resolved.

**Concept and design:** Streuli, Ibrahim, Sharma, Esmailian, Sezan, Sahid, Bhavnani

1  
2  
3 **Acquisition, analysis, and interpretation of data:** All authors  
4

5  
6 **Drafting of the manuscript:** Streuli, Bhavnani  
7

8  
9 465 **Critical revision of the manuscript for important intellectual content:** All authors  
10

11  
12 **Literature search:** Streuli, Ibrahim, Sharma, Bhavnani  
13

14  
15 **Obtained funding:** Sahid, Bhavnani  
16

17  
18 **Administrative, technical, or material support:** Sahid, Bhavnani  
19

20  
21 **Supervision:** Sahid, Bhavnani  
22

23  
24 470 **Final approval of the version to be published:** All authors  
25

26 **Role of the Funder/Sponsor:** The funders had no role in the design and conduct of the study; collection,  
27 management, analysis, and interpretation of the data; preparation, review, or approval of the manuscript;  
28 and decision to submit the manuscript for publication.  
29  
30  
31  
32  
33  
34  
35  
36

37 475 **COMPETING INTERESTS**  
38

39 Carrie Farrell was a paid consultant on the project from inception until August of 2019. Alex Marchetti is  
40 a former employee of technology partner INVIVO and her engagement with the project began while she  
41 was with that organization in 2018. Sanjeev Bhavnani discloses Scripps Clinic Grants for clinical trials  
42 related to machine learning and technology designs in cardiovascular imaging, being a Pfizer Health  
43 Information Technology Advisory Board member on strategies related to health information technology,  
44 being a Bristol Meyers Squibb Digital Health Advisory board member on strategies related to digital health  
45 technologies, being an Anthem AI Consultant on projects related to cardiovascular care, being a Proteus  
46 Health Chair DSMB on digital medication monitoring in hepatitis C, being an American College of  
47  
48 480  
49  
50  
51  
52  
53  
54  
55  
56  
57  
58  
59  
60

1  
2  
3 Cardiology Innovations Advisory Group Principal investigator and committee member on various  
4  
5 485 innovation projects in cardiovascular care, having Analytics4Life Stock options as a scientific advisor on  
6  
7 artificial intelligence in cardiovascular diagnostics, and having Blumio Stock options as a scientific advisor  
8  
9 on new technology designs in hypertension. Markie Esmailian discloses US patents in Illumesense Inc.,  
10  
11 using data analytics and machine learning algorithms for clinical decision support for alternative health  
12  
13 therapies. Markie Esmailian is also Founder of IllumeSense Inc. as majority shareholder and principle. All  
14  
15 other authors declare that they have no relevant or material financial interests that relate to the research  
16  
17 490 described in this paper.  
18  
19  
20  
21  
22  
23  
24

## 25 **FUNDING**

26  
27 Alliance Healthcare Foundation i2 Innovation Grant 2017 (Grant #18-34728477)  
28  
29  
30  
31 495

## 32 **DATA SHARING STATEMENT**

33  
34 Data are deidentified participant data and are available from the corresponding author upon request.  
35  
36  
37 Reuse is not permitted.  
38  
39  
40  
41  
42  
43  
44  
45 500  
46  
47  
48  
49  
50  
51  
52  
53  
54  
55  
56  
57  
58  
59  
60

## REFERENCES

1. Nicolai T, Fuchs O, von Mutius E. Caring for the Wave of Refugees in Munich. *N Engl J Med*. 2015 Oct 22;373(17):1593-5. doi: 10.1056/NEJMp1512139. Epub 2015 Sep 23. PMID: 26397950.
2. Kumar R. Refugee Articulations of Health: A Culture-Centered Exploration of Burmese Refugees' Resettlement in the United States. *Health Commun*. 2020 Jan 13:1-11. doi: 10.1080/10410236.2020.1712035. Epub ahead of print. PMID: 31931620.
3. Westgard B, Martinson BC, Maciosek M, Brown M, Xu Z, Farah F, Ahmed O, Dalmar A, Dubois D, Sanka L, Pryce D. Prevalence of Cardiovascular Disease and Risk Factors Among Somali Immigrants and Refugees. *J Immigr Minor Health*. 2020 Sep 17. doi: 10.1007/s10903-020-01078-3. Epub ahead of print. PMID: 32940817.
4. Shadmi E, Chen Y, Dourado I, Faran-Perach I, Furler J, Hangoma P, Hanvoravongchai P, Obando C, Petrosyan V, Rao KD, Ruano AL, Shi L, de Souza LE, Spitzer-Shohat S, Sturgiss E, Suphanchaimat R, Uribe MV, Willems S. Health equity and COVID-19: global perspectives. *Int J Equity Health*. 2020 Jun 26;19(1):104. doi: 10.1186/s12939-020-01218-z. PMID: 32586388; PMCID: PMC7316580.
5. Decoteau CL. The "Western disease": Autism and Somali parents' embodied health movements. *Soc Sci Med*. 2017 Mar;177:169-176. doi: 10.1016/j.socscimed.2017.01.064. Epub 2017 Feb 1. PMID: 28171816.
6. Henneberry, S. University of Minnesota estimates autism spectrum disorder (ASD) in Somali and non-Somali children in Minneapolis. Press Release. 16 Dec 2013. [https://rtc.umn.edu/autism/doc/Somali\\_Autism\\_study\\_press\\_release.pdf](https://rtc.umn.edu/autism/doc/Somali_Autism_study_press_release.pdf)
7. Dyer, O. Measles Outbreak in Somali American Community Follows Anti-Vaccine Talks. *BMJ*. 2017 May 16: DOI:10.1136/bmj.j2378.
8. Hviid A, Hansen JV, Frisch M, Melbye M. Measles, Mumps, Rubella Vaccination and Autism. *Ann Intern Med*. 2019;170(8):513-520. doi:10.7326/M18-2101.

- 1  
2  
3 525 9. Nabulsi M, Harris J, Letelier L, Ramos K, Hopayian K, Parkin C, Porzsolt F, Sestini P, Slavin M,  
4  
5 Summerskill W. Effectiveness of education in evidence-based healthcare: the current state of  
6  
7 outcome assessments and a framework for future evaluations. *Int J Evid Based Healthc*. 2007  
8  
9 Dec;5(4):468-76. doi: 10.1111/j.1479-6988.2007.00084.x. PMID: 21631807.  
10  
11  
12 10. Merchant Z, Goetz ET, Cifuentes L, Keeney-Kennicutt W, Davis TJ. Effectiveness of Virtual Reality-  
13  
14 530 Based Instruction on Students' Learning Outcomes in K-12 and Higher Education: A meta-analysis.  
15  
16 *Computers & Education*. Jan 2014. DOI: 10.1016/j.compedu.2013.07.033.  
17  
18  
19 11. Psotka J. Immersive Training Systems: Virtual reality and education and training. *Instructional*  
20  
21 *Science*. 1995. DOI: 10.1007/BF00896880.  
22  
23  
24 12. Riva G, Baños RM, Botella C, Mantovani F, Gaggioli A. Transforming Experience: The potential for  
25  
26 535 augmented reality and virtual reality for enhancing personal and clinical change. *Psychiatry*. 30  
27  
28 September 2016. DOI: 10.3389/fpsy.2016.00164.  
29  
30  
31 13. Zhou S, Bickmore T, Paasche-Orlow M, Jack B. Agent-User Concordance and Satisfaction with a  
32  
33 Virtual Hospital Discharge Nurse. In: Bickmore T., Marsella S., Sidner C. (eds) *Intelligent Virtual*  
34  
35 *Agents*. IVA 2014. *Lecture Notes in Computer Science*, vol 8637. 2014. DOI: 10.1007/978-3-319-  
36  
37 540 09767-1\_63.  
38  
39  
40 14. Bhavnani SP, Narula J, Sengupta PP. Mobile technology and the digitization of healthcare.  
41  
42 *European Heart Journal*. 7 May 2016. DOI: 10.1093/eurheartj/ehv770.  
43  
44  
45 15. City Heights Demographics and Statistics. (n.d.). Retrieved October 26, 2020, from  
46  
47 <https://www.niche.com/places-to-live/n/city-heights-san-diego-ca/residents/>  
48  
49 545 16. Fisher KE, Yefimova K, and Yafi E. Future's Butterflies: Co-Designing ICT Wayfaring Technology  
50  
51 with Refugee Syrian Youth. In *Proceedings of the The 15th International Conference on*  
52  
53 *Interaction Design and Children (IDC '16)*. 2016. DOI: 10.1145/2930674.2930701.  
54  
55  
56  
57  
58  
59  
60

- 1  
2  
3 17. Israel BA, Schulz AJ, Parker EA, Becker AB. Review of community-based research: assessing  
4 partnership approaches to improve public health. *Annu Rev Public Health*. 1998;19:173-202. doi:  
5  
6 550 10.1146/annurev.publhealth.19.1.173. PMID: 9611617.  
7  
8  
9  
10 18. Miles MB, Huberman AM. *Qualitative data analysis: An expanded sourcebook*. sage; 1994 Jan 12.  
11  
12 19. Kim W, Kim I, Baltimore K, Imtiaz AS, Bhattacharya BS, Lin L. Simple contents and good readability:  
13 Improving health literacy for LEP populations. *Int J Med Inform*. 2020 Jul 11;141:104230. doi:  
14  
15 10.1016/j.ijmedinf.2020.104230. Epub ahead of print. PMID: 32688291.  
16  
17  
18 555 20. Maenner MJ, Shaw KA, Baio J, et al. Prevalence of Autism Spectrum Disorder Among Children  
19 Aged 8 Years — Autism and Developmental Disabilities Monitoring Network, 11 Sites, United  
20 States, 2016. *MMWR Surveill Summ* 2020, 69 (No. SS-4): 1-12.  
21  
22  
23 21. Hewitt A, Hall-Lande J, Hamre K, Esler AN, Punyko J, Reichle J, Gulaid A. Autism Spectrum Disorder  
24 (ASD) Prevalence in Somali and Non-Somali Children. *J Autism Dev Disord* 2016;2599-2608. DOI  
25  
26 560 10.1007/s10803-016-2793-6.  
27  
28  
29  
30  
31 22. Diemer J, Alpers GW, Peperkorn HM, Shiban Y, Mühlberger A. The impact of perception and  
32 presence on emotional reactions: a review of research in virtual reality. *Front Psychol*. 2015;6:26.  
33  
34 Published 2015 Jan 30. doi:10.3389/fpsyg.2015.00026.  
35  
36  
37  
38 23. Santoli JM, Lindley MC, DeSilva MB, et al. Effects of the COVID-19 Pandemic on Routine Pediatric  
39 Vaccine Ordering and Administration — United States, 2020. *MMWR Morb Mortal Wkly Rep*  
40  
41 565 2020;69:591–593. DOI: <http://dx.doi.org/10.15585/mmwr.mm6919e2external icon>.  
42  
43  
44  
45  
46  
47  
48  
49  
50  
51  
52  
53  
54 570  
55  
56  
57  
58  
59  
60

**TABLE 2. Questions and Responses from Project Advisors**

| Questions Asked to Advisors | Salient Responses |
|-----------------------------|-------------------|
|-----------------------------|-------------------|

## TABLES

**TABLE 1. Focus Group Questions and Responses from Somali Community**

| Category and Questions for Community Members                                               | Salient Responses                                                                                                                                                                                                                                                                                                                                                                                                                        |
|--------------------------------------------------------------------------------------------|------------------------------------------------------------------------------------------------------------------------------------------------------------------------------------------------------------------------------------------------------------------------------------------------------------------------------------------------------------------------------------------------------------------------------------------|
| <b>Session 1: General Health</b>                                                           |                                                                                                                                                                                                                                                                                                                                                                                                                                          |
| <b>Examples of questions asked in focus groups</b>                                         |                                                                                                                                                                                                                                                                                                                                                                                                                                          |
| “What are some of your community’s biggest health concerns in the U.S.?”                   | <p>“Autism.”</p> <p>“One of the biggest health problems that people have that I forgot to mention is that most people don't understand a lot of English.”</p>                                                                                                                                                                                                                                                                            |
| “What do you find not trustworthy within the health care system?”                          | <p>“Lack of good communication...especially in primary language.”</p> <p>“Health insurance!”</p>                                                                                                                                                                                                                                                                                                                                         |
| <b>Session 2: Pediatric Health</b>                                                         |                                                                                                                                                                                                                                                                                                                                                                                                                                          |
| <b>Examples of Questions asked in focus groups</b>                                         |                                                                                                                                                                                                                                                                                                                                                                                                                                          |
| “Do you trust your doctor’s recommendations for your child’s health?”                      | <p>“Yes, whatever recommendation the doctor gives me, I have to take it.”</p> <p>“I mean I always think it's obviously for a good reason, but for me, I think I always do my own research before I automatically assume that's what's best for me. If it's something very serious like [the doctor] saying for example 'you need a surgery,' that [I] automatically would be like 'let me get another opinion from another doctor.’”</p> |
| <b>Session 3: Vaccination</b>                                                              |                                                                                                                                                                                                                                                                                                                                                                                                                                          |
| <b>Examples of questions asked in focus groups</b>                                         |                                                                                                                                                                                                                                                                                                                                                                                                                                          |
| “What are the topics or things that you would like to know about in relation to vaccines?” | <p>“If they could show how the vaccine works in the child’s body and what it does – if it can be visualized.”</p> <p>“That before the vaccines are given to our children, for it to be explained to us what the risks are - the sided effects, and the benefits. When we compare the two, then make a decision.”</p>                                                                                                                     |

**Table 1:** Sample questions and salient responses from exploratory focus groups indicated that parents were very concerned about autism and that they found it difficult to trust the healthcare system due to lack of communication in their primary language. While parents trusted certain doctors, they also highlighted the importance of doing their own research to understand their children’s health. Parents also expressed a desire to understand how vaccines work within the body and what the risks and benefits are of vaccination.

|                                                                                                                                                                    |                                                                                                                                                                                                                                                                                                                                                |
|--------------------------------------------------------------------------------------------------------------------------------------------------------------------|------------------------------------------------------------------------------------------------------------------------------------------------------------------------------------------------------------------------------------------------------------------------------------------------------------------------------------------------|
| <p>1) What are your overall impressions of the story? What did you like the most about the story? Is there anything that you think should change in the story?</p> | <p>“Overall, I like how the story flows and the way in which the educational components are presented. I also think it’s a great idea to have the story centered around a meal, as it seems culturally relevant and helps make the situation relatable to users.”</p>                                                                          |
| <p>2) Have you noticed any inaccuracies in scientific and medical facts in the story?</p>                                                                          | <p>“Based on my past feedback, I am glad that this story has been selected. I like the simplicity of the conversation with its effective focus on the key messaging of the value of the timely vaccination to help raise healthy kids.”</p>                                                                                                    |
| <p>3) Was the story clear and easy to understand? Did the story flow naturally?</p>                                                                                | <p>“No.”</p> <p>“No, from my knowledge all of the content presented is accurate.”</p>                                                                                                                                                                                                                                                          |
| <p>4) Was the story culturally appropriate? Was the cultural component balanced throughout?</p>                                                                    | <p>“Very clear and flowed in a way we would use in teaching in general. Very logical progression of information.”</p> <p>“Yes, the story is clear and flows very naturally.”</p>                                                                                                                                                               |
| <p>5) Was the story convincing? Does it have a potential to change attitudes of vaccine hesitant parents?</p>                                                      | <p>“One of the things I liked about this story is the emphasis of the great Somali family bond that can be pivotal in achieving the goals of this project to leverage the great trust Somali parents put on their relative and educated community members.”</p> <p>“Yes, the story was culturally relevant and appropriate.”</p>               |
| <p>6) In your opinion, does the story increase knowledge?</p>                                                                                                      | <p>“I think it gives the information about immunization, the science behind it, and does not focus on the controversies, which have not been supported by medical data.”</p> <p>“Yes. I would just make sure we really take advantage of VR when we show the visuals inside the body and how vaccine’s function within the immune system.”</p> |
|                                                                                                                                                                    | <p>“Yes, it stays with the facts in a positive way, in a healthy environment with the families.”</p> <p>“It can, depending on the background of the parents and audience and their desire to benefit from such educational program.”</p>                                                                                                       |

580 **Table 2:** Sample questions and salient responses from engagement with project advisors. Advisors enjoyed the clarity and flow of the storyline as well as finding it culturally relevant and appropriate. They also believed that the story had significant potential to increase vaccine knowledge.



**TABLE 3: Survey following initial script exposure**

| How comfortable are you with MMR vaccination? | %   | How comfortable are you with MMR vaccination? | %    | Would you get MMR for your child? | %   | Would you get MMR for your child? | %    |
|-----------------------------------------------|-----|-----------------------------------------------|------|-----------------------------------|-----|-----------------------------------|------|
| Very comfortable                              | 52% | Very comfortable                              | 70%+ | Yes, I would                      | 65% | Yes, I would                      | 82%+ |
| Somewhat comfortable                          | 24% | Somewhat comfortable                          | 18%- | I would consider it               | 23% | I would consider it               | 12%- |
| Not at all comfortable                        | 24% | Not at all comfortable                        | 12%- | I don't know                      | 6%  | I don't know                      | 0%-  |
|                                               |     |                                               |      | No, I would not                   | 6%  | No, I would not                   | 6%   |

585 **Table 3:** This table shows the results of a survey of 17 Somali mothers following exposure to the initial  
 590 script for the VR. + indicates % increased following exposure to the script, - indicates % decreased  
 following exposure to the script.

595

600 **FIGURES**

605 **Figure 1:** Phased approach to VR development. Assessment of community needs began in April 2019 in advance of the development of the VR. Iterative testing took place throughout 2019 and 2020, with some gaps in testing due to the restrictions of the COVID-19 pandemic. The final VR product has been completed as of June 2020 and is currently being tested with the Somali community.

610 **Figure 2:** Still frame from prototype. The prototype consisted of a motion storyboard with a voiceover which was translated into Somali for presentation to the community.

615 **Figure 3:** Top row: Chapters 1 and 2 of the VR story. Bottom row: Chapters 3 and 4 of the VR story. In chapter 1 of the animation, the expectant mother, her husband, and her sister visit the doctor's office and learn about measles, mumps, and rubella (MMR). In chapter 2, the family learns how the immune system works. In chapter 3, the family learns from the doctor what the MMR vaccine does and how it works. In Chapter 4, the doctor explains to the family the risks and benefits of MMR vaccination, including a statement debunking the association between autism and vaccination. Finally, the 360-degree video concludes by showing the new mother and her family – including the new, healthy baby – and the new mother states that after learning all the facts, she has decided to vaccinate her child.

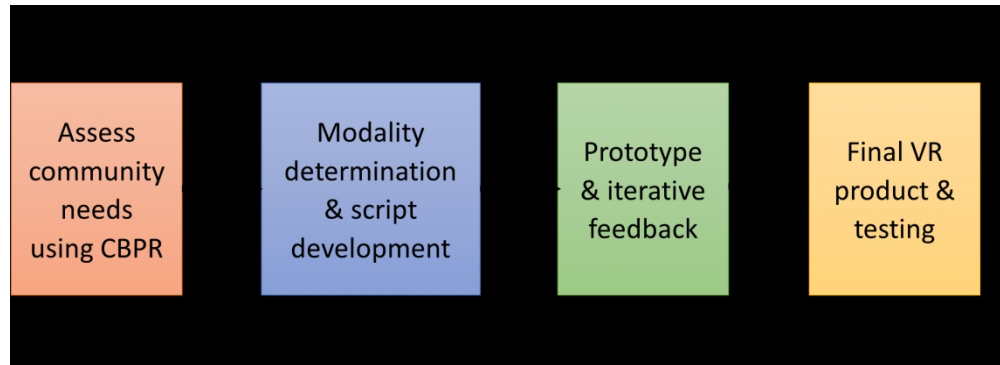

Phased approach to VR development. Assessment of community needs began in April 2019 in advance of the development of the VR. Iterative testing took place throughout 2019 and 2020, with some gaps in testing due to the restrictions of the COVID-19 pandemic. The final VR product has been completed as of June 2020 and is currently being tested with the Somali community.

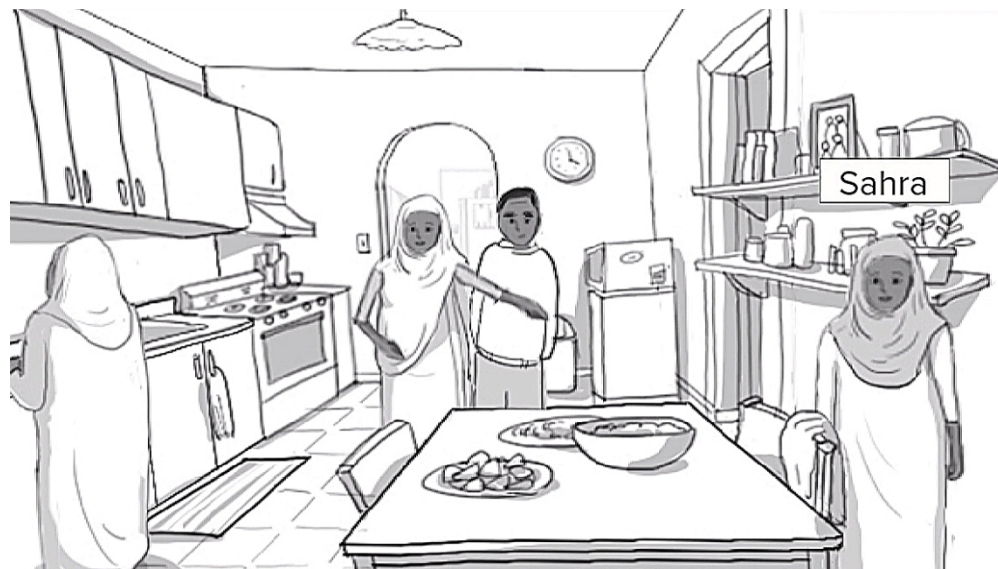

Still frame from prototype. The prototype consisted of a motion storyboard with a voiceover which was translated into Somali for presentation to the community.

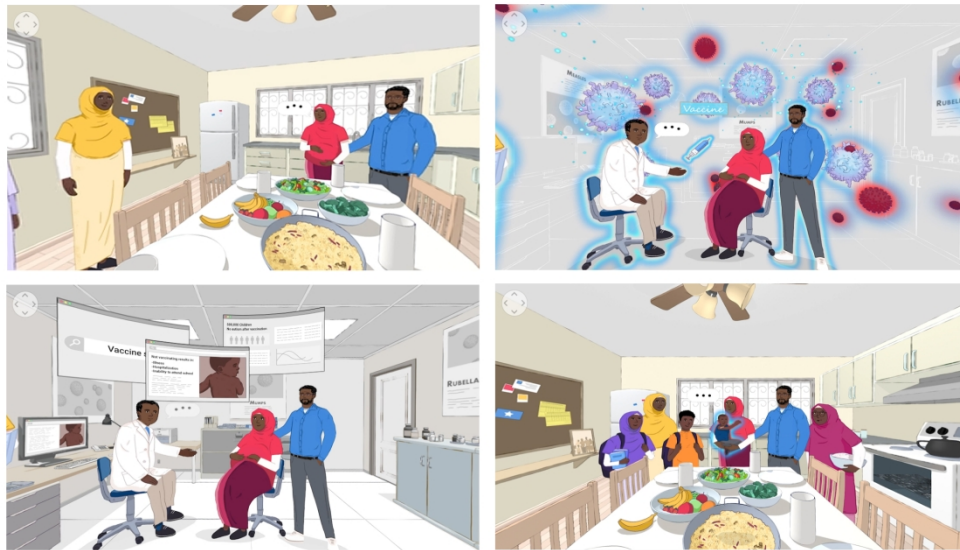

Top row: Chapters 1 and 2 of the VR story. Bottom row: Chapters 3 and 4 of the VR story. In chapter 1 of the animation, the expectant mother, her husband, and her sister visit the doctor's office and learn about measles, mumps, and rubella (MMR). In chapter 2, the family learns how the immune system works. In chapter 3, the family learns from the doctor what the MMR vaccine does and how it works. In Chapter 4, the doctor explains to the family the risks and benefits of MMR vaccination, including a statement debunking the association between autism and vaccination. Finally, the 360-degree video concludes by showing the new mother and her family – including the new, healthy baby – and the new mother states that after learning all the facts, she has decided to vaccinate her child.

## Standards for Reporting Qualitative Research (SRQR)\*

<http://www.equator-network.org/reporting-guidelines/srqr/>

Page/line no(s).

### Title and abstract

|                                                                                                                                                                                                                                                              |        |
|--------------------------------------------------------------------------------------------------------------------------------------------------------------------------------------------------------------------------------------------------------------|--------|
| <p><b>Title</b> - Concise description of the nature and topic of the study Identifying the study as qualitative or indicating the approach (e.g., ethnography, grounded theory) or data collection methods (e.g., interview, focus group) is recommended</p> | Page 1 |
| <p><b>Abstract</b> - Summary of key elements of the study using the abstract format of the intended publication; typically includes background, purpose, methods, results, and conclusions</p>                                                               | Page 3 |

### Introduction

|                                                                                                                                                                     |                 |
|---------------------------------------------------------------------------------------------------------------------------------------------------------------------|-----------------|
| <p><b>Problem formulation</b> - Description and significance of the problem/phenomenon studied; review of relevant theory and empirical work; problem statement</p> | Page 6          |
| <p><b>Purpose or research question</b> - Purpose of the study and specific objectives or questions</p>                                                              | Page 7 Line 102 |

### Methods

|                                                                                                                                                                                                                                                                                                                                                                                                             |                                                                                                                                                                                                                                                                                                                                                                    |
|-------------------------------------------------------------------------------------------------------------------------------------------------------------------------------------------------------------------------------------------------------------------------------------------------------------------------------------------------------------------------------------------------------------|--------------------------------------------------------------------------------------------------------------------------------------------------------------------------------------------------------------------------------------------------------------------------------------------------------------------------------------------------------------------|
| <p><b>Qualitative approach and research paradigm</b> - Qualitative approach (e.g., ethnography, grounded theory, case study, phenomenology, narrative research) and guiding theory if appropriate; identifying the research paradigm (e.g., postpositivist, constructivist/interpretivist) is also recommended; rationale**</p>                                                                             | <p>Page 8 line 120</p> <p>Page 9 line 160</p> <p>We employed CBPR and community co-design in order to develop educational content that was created by and for the communities for whom it was intended. We used focus groups, interviews, and surveys in order to triangulate our data and to include the voices of the community in as many ways as possible.</p> |
| <p><b>Researcher characteristics and reflexivity</b> - Researchers' characteristics that may influence the research, including personal attributes, qualifications/experience, relationship with participants, assumptions, and/or presuppositions; potential or actual interaction between researchers' characteristics and the research questions, approach, methods, results, and/or transferability</p> | Page 8 Line 121                                                                                                                                                                                                                                                                                                                                                    |
| <p><b>Context</b> - Setting/site and salient contextual</p>                                                                                                                                                                                                                                                                                                                                                 | Page 8 Line 135                                                                                                                                                                                                                                                                                                                                                    |

|                                                                                                                                                                                                                                                                                                                                                                                                                                                                                                                                                                                                                                                                    |                                                                                                                                                                                                                                                                                                                                                                                                                                                                                                                                                                                                                                                                                                                                   |
|--------------------------------------------------------------------------------------------------------------------------------------------------------------------------------------------------------------------------------------------------------------------------------------------------------------------------------------------------------------------------------------------------------------------------------------------------------------------------------------------------------------------------------------------------------------------------------------------------------------------------------------------------------------------|-----------------------------------------------------------------------------------------------------------------------------------------------------------------------------------------------------------------------------------------------------------------------------------------------------------------------------------------------------------------------------------------------------------------------------------------------------------------------------------------------------------------------------------------------------------------------------------------------------------------------------------------------------------------------------------------------------------------------------------|
| factors; rationale**                                                                                                                                                                                                                                                                                                                                                                                                                                                                                                                                                                                                                                               |                                                                                                                                                                                                                                                                                                                                                                                                                                                                                                                                                                                                                                                                                                                                   |
| <p>1</p> <p>2 <b>Sampling strategy</b> - How and why research</p> <p>3 participants, documents, or events were</p> <p>4 selected; criteria for deciding when no further</p> <p>5 sampling was necessary (e.g., sampling</p> <p>6 saturation); rationale**</p> <p>7</p> <p>8</p> <p>9</p> <p>10</p> <p>11</p> <p>12</p> <p>13</p> <p>14</p> <p>15</p> <p>16</p> <p>17</p> <p>18</p> <p>19</p> <p>20</p>                                                                                                                                                                                                                                                             | <p>Page 8 line 125.</p> <p>Somali community members were chosen in the manner that they were because we recognize the importance of including the entire community in research. There is a strong oral tradition in Somali culture and parents often ask advice from extended family and community when making decisions about healthcare. Thus, we found it necessary to engage individuals of all ages and genders who spoke English and Somali to guide the educational material and provide their input.</p> <p>Expert advisors were chosen in order to provide us with another view of the issue from a technical angle so that we could better create something that could be realistically delivered to the community.</p> |
| <p>21 <b>Ethical issues pertaining to human subjects</b> -</p> <p>22 Documentation of approval by an appropriate</p> <p>23 ethics review board and participant consent,</p> <p>24 or explanation for lack</p> <p>25 thereof; other confidentiality and data security</p> <p>26 issues</p> <p>27</p>                                                                                                                                                                                                                                                                                                                                                                | <p>Page 9 Line 150</p>                                                                                                                                                                                                                                                                                                                                                                                                                                                                                                                                                                                                                                                                                                            |
| <p>28 <b>Data collection methods</b> - Types of data</p> <p>29 collected; details of data collection procedures</p> <p>30 including (as appropriate) start and stop dates</p> <p>31 of data collection and analysis, iterative</p> <p>32 process, triangulation of sources/methods, and</p> <p>33 modification of procedures in response to</p> <p>34 evolving study findings; rationale**</p> <p>35</p> <p>36</p> <p>37</p> <p>38</p> <p>39</p> <p>40</p> <p>41</p> <p>42</p> <p>43</p> <p>44</p> <p>45</p> <p>46</p> <p>47</p> <p>48</p> <p>49</p> <p>50</p> <p>51</p> <p>52</p> <p>53</p> <p>54</p> <p>55</p> <p>56</p> <p>57</p> <p>58</p> <p>59</p> <p>60</p> | <p>Page 10 Line 180</p> <p>We collected data via focus groups, interviews, and surveys in order to triangulate data. We also wanted to reach as many community members as possible so we engaged people online, at the offices of the nonprofit organization, and at community health fairs.</p>                                                                                                                                                                                                                                                                                                                                                                                                                                  |

|    |                                                                                         |  |
|----|-----------------------------------------------------------------------------------------|--|
| 1  |                                                                                         |  |
| 2  | <b>Data collection instruments and technologies</b> - Description of instruments (e.g., |  |
| 3  | interview guides, questionnaires) and devices (e.g., audio recorders) used for data     |  |
| 4  | collection; if/how the instrument(s) changed over the course of the study               |  |
| 5  |                                                                                         |  |
| 6  | <b>Units of study</b> - Number and relevant characteristics of participants, documents, |  |
| 7  | or events included in the study; level of participation (could be reported in results)  |  |
| 8  |                                                                                         |  |
| 9  | <b>Data processing</b> - Methods for processing data prior to and during analysis,      |  |
| 10 | including transcription, data entry, data management and security, verification of      |  |
| 11 | data integrity, data coding, and anonymization/de-identification of excerpts            |  |
| 12 |                                                                                         |  |
| 13 | <b>Data analysis</b> - Process by which inferences, themes, etc., were identified and   |  |
| 14 | developed, including the researchers involved in data analysis; usually references a    |  |
| 15 | specific paradigm or approach; rationale**                                              |  |
| 16 |                                                                                         |  |
| 17 | <b>Techniques to enhance trustworthiness</b> - Techniques to enhance trustworthiness    |  |
| 18 | and credibility of data analysis (e.g., member checking, audit trail, triangulation);   |  |
| 19 | rationale**                                                                             |  |
| 20 |                                                                                         |  |

## Results/findings

|    |                                                                                             |  |
|----|---------------------------------------------------------------------------------------------|--|
| 21 |                                                                                             |  |
| 22 |                                                                                             |  |
| 23 | <b>Synthesis and interpretation</b> - Main findings (e.g., interpretations, inferences, and |  |
| 24 | themes); might include development of a theory or model, or integration with                |  |
| 25 | prior research or theory                                                                    |  |
| 26 |                                                                                             |  |
| 27 | <b>Links to empirical data</b> - Evidence (e.g., quotes, field notes, text excerpts,        |  |
| 28 | photographs) to substantiate analytic findings                                              |  |
| 29 |                                                                                             |  |

## Discussion

|    |                                                                                           |  |
|----|-------------------------------------------------------------------------------------------|--|
| 30 |                                                                                           |  |
| 31 |                                                                                           |  |
| 32 | <b>Integration with prior work, implications, transferability, and contribution(s) to</b> |  |
| 33 | <b>the field</b> - Short summary of main findings; explanation of how findings and        |  |
| 34 | conclusions connect to, support, elaborate on, or challenge conclusions of earlier        |  |
| 35 | scholarship; discussion of scope of application/generalizability; identification of       |  |
| 36 | unique contribution(s) to scholarship in a discipline or field                            |  |
| 37 |                                                                                           |  |
| 38 | <b>Limitations</b> - Trustworthiness and limitations of findings                          |  |
| 39 |                                                                                           |  |

## Other

|    |                                                                                            |  |
|----|--------------------------------------------------------------------------------------------|--|
| 40 |                                                                                            |  |
| 41 |                                                                                            |  |
| 42 | <b>Conflicts of interest</b> - Potential sources of influence or perceived influence on    |  |
| 43 | study conduct and conclusions; how these were managed                                      |  |
| 44 |                                                                                            |  |
| 45 | <b>Funding</b> - Sources of funding and other support; role of funders in data collection, |  |
| 46 | interpretation, and reporting                                                              |  |
| 47 |                                                                                            |  |

\*The authors created the SRQR by searching the literature to identify guidelines, reporting standards, and critical appraisal criteria for qualitative research; reviewing the reference lists of retrieved sources; and contacting experts to gain feedback. The SRQR aims to improve the transparency of all aspects of qualitative research by providing clear standards for reporting qualitative research.



1  
2  
3  
4  
5  
6  
7  
8  
9  
10  
11  
12  
13  
14  
15  
16  
17  
18  
19  
20  
21  
22  
23  
24  
25  
26  
27  
28  
29  
30  
31  
32  
33  
34  
35  
36  
37  
38  
39  
40  
41  
42  
43  
44  
45  
46  
47  
48  
49  
50  
51  
52  
53  
54  
55  
56  
57  
58  
59  
60

\*\*The rationale should briefly discuss the justification for choosing that theory, approach, method, or technique rather than other options available, the assumptions and limitations implicit in those choices, and how those choices influence study conclusions and transferability. As appropriate, the rationale for several items might be discussed together.

**Reference:**

O'Brien BC, Harris IB, Beckman TJ, Reed DA, Cook DA. **Standards for reporting qualitative research: a synthesis of recommendations.** *Academic Medicine*, Vol. 89, No. 9 / Sept 2014  
DOI: 10.1097/ACM.0000000000000388

For peer review only

# BMJ Open

## Development of a Cultural and Linguistically Sensitive Virtual Reality Educational Platform to Improve Vaccine Acceptance within a Refugee Population: The SHIFA Community Engagement-Public Health Innovation Program

|                                 |                                                                                                                                                                                                                                                                                                                                                                                                                                                                                                                                                                                                                                                                                                                                                                                                                                                                                                                                                                  |
|---------------------------------|------------------------------------------------------------------------------------------------------------------------------------------------------------------------------------------------------------------------------------------------------------------------------------------------------------------------------------------------------------------------------------------------------------------------------------------------------------------------------------------------------------------------------------------------------------------------------------------------------------------------------------------------------------------------------------------------------------------------------------------------------------------------------------------------------------------------------------------------------------------------------------------------------------------------------------------------------------------|
| Journal:                        | <i>BMJ Open</i>                                                                                                                                                                                                                                                                                                                                                                                                                                                                                                                                                                                                                                                                                                                                                                                                                                                                                                                                                  |
| Manuscript ID                   | bmjopen-2021-051184.R1                                                                                                                                                                                                                                                                                                                                                                                                                                                                                                                                                                                                                                                                                                                                                                                                                                                                                                                                           |
| Article Type:                   | Original research                                                                                                                                                                                                                                                                                                                                                                                                                                                                                                                                                                                                                                                                                                                                                                                                                                                                                                                                                |
| Date Submitted by the Author:   | 02-Jul-2021                                                                                                                                                                                                                                                                                                                                                                                                                                                                                                                                                                                                                                                                                                                                                                                                                                                                                                                                                      |
| Complete List of Authors:       | Streuli, Samantha; University of California San Diego, Anthropology<br>Ibrahim, Najla; Somali Family Service of San Diego<br>Mohamed, Alia; San Diego State University<br>Sharma, Manupriya; Palomar College<br>Esmailian, Markie; Illumesense Inc.<br>Sezan, Ibrahim; Distinct Insights LLC<br>Farrell, Carrie; San Diego State University<br>Sawyer, Mark; University of California San Diego School of Medicine<br>Meyer, Dan; The University of Texas Southwestern Medical Center<br>El-Maleh, Khaled; QUALCOMM Inc<br>Thamman, Ritu; University of Pittsburgh Department of Medicine<br>Marchetti, Alex; Miami University<br>Lincoln, Alan; Alliant International University - San Diego<br>Courchesne, Eric; University of California San Diego School of Medicine<br>Sahid, Ahmed; Somali Family Service of San Diego<br>Bhavnani, Sanjeev; Scripps Clinic La Jolla - Genesee Executive Plaza, Healthcare Innovation & Practice Transformation Laboratory |
| <b>Primary Subject Heading</b>: | Qualitative research                                                                                                                                                                                                                                                                                                                                                                                                                                                                                                                                                                                                                                                                                                                                                                                                                                                                                                                                             |
| Secondary Subject Heading:      | Public health                                                                                                                                                                                                                                                                                                                                                                                                                                                                                                                                                                                                                                                                                                                                                                                                                                                                                                                                                    |
| Keywords:                       | Paediatric infectious disease & immunisation < PAEDIATRICS, QUALITATIVE RESEARCH, Community child health < PAEDIATRICS                                                                                                                                                                                                                                                                                                                                                                                                                                                                                                                                                                                                                                                                                                                                                                                                                                           |
|                                 |                                                                                                                                                                                                                                                                                                                                                                                                                                                                                                                                                                                                                                                                                                                                                                                                                                                                                                                                                                  |

SCHOLARONE™  
Manuscripts

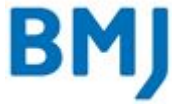

I, the Submitting Author has the right to grant and does grant on behalf of all authors of the Work (as defined in the below author licence), an exclusive licence and/or a non-exclusive licence for contributions from authors who are: i) UK Crown employees; ii) where BMJ has agreed a CC-BY licence shall apply, and/or iii) in accordance with the terms applicable for US Federal Government officers or employees acting as part of their official duties; on a worldwide, perpetual, irrevocable, royalty-free basis to BMJ Publishing Group Ltd ("BMJ") its licensees and where the relevant Journal is co-owned by BMJ to the co-owners of the Journal, to publish the Work in this journal and any other BMJ products and to exploit all rights, as set out in our [licence](#).

The Submitting Author accepts and understands that any supply made under these terms is made by BMJ to the Submitting Author unless you are acting as an employee on behalf of your employer or a postgraduate student of an affiliated institution which is paying any applicable article publishing charge ("APC") for Open Access articles. Where the Submitting Author wishes to make the Work available on an Open Access basis (and intends to pay the relevant APC), the terms of reuse of such Open Access shall be governed by a Creative Commons licence – details of these licences and which [Creative Commons](#) licence will apply to this Work are set out in our licence referred to above.

Other than as permitted in any relevant BMJ Author's Self Archiving Policies, I confirm this Work has not been accepted for publication elsewhere, is not being considered for publication elsewhere and does not duplicate material already published. I confirm all authors consent to publication of this Work and authorise the granting of this licence.

1  
2  
3 **Development of a Cultural and Linguistically Sensitive Virtual Reality Educational Platform to Improve**  
4 **Vaccine Acceptance within a Refugee Population: The SHIFA Community Engagement-Public Health**  
5 **Innovation Program**  
6  
7  
8

9  
10 **Author Block:** Samantha A. Streuli PhD<sup>1</sup>, Najla Ibrahim MPH<sup>2</sup>, Alia Mohamed<sup>3</sup>, Manupriya Sharma PhD<sup>4</sup>,  
11  
12 5 Markie Esmailian<sup>5</sup>, Ibrahim Sezan PhD<sup>6</sup>, Carrie Farrell MPA<sup>7</sup>, Mark Sawyer MD<sup>8</sup>, Dan Meyer MD<sup>9</sup>, Khaled  
13  
14 El-Maleh<sup>10</sup>, Ritu Thamman MD<sup>11</sup>, Alex Marchetti<sup>12</sup>, Alan Lincoln PhD<sup>13</sup>, Eric Courchesne<sup>14</sup>, Ahmed Sahid<sup>2</sup>,  
15  
16 Sanjeev P. Bhavnani MD<sup>15</sup>  
17  
18

19  
20 **Affiliations:** 1) Department of Anthropology, University of California San Diego 2) Somali Family Service  
21  
22 of San Diego 3) San Diego State University 4) Palomar College 5) Illumesense Inc. 6) Distinct Insights, LLC  
23  
24 10 7) San Diego State University 8) UC San Diego School of Medicine 9) University of Texas Southwestern  
25  
26 Medical Center 10) Qualcomm Inc. 11) Department of Medicine University of Pittsburgh 12) Miami  
27  
28 University 13) Alliant International University 14) UC San Diego School of Medicine 15) Scripps Clinic,  
29  
30 Healthcare Innovation & Practice Transformation Laboratory  
31  
32  
33

34 **Author for Correspondence:** Samantha Streuli  
35  
36

37 15 **Affiliation:** Department of Anthropology, University of California, San Diego  
38  
39

40 **Address:** 9500 Gilman Dr. #0532 La Jolla, CA 92093  
41  
42

43 **Phone:** (858) 952-6238  
44  
45

46 **Email:** sstreuli@ucsd.edu  
47  
48

49 **Keywords:** vaccination, refugee health, community engagement, virtual reality, education  
50  
51

52 20 **Manuscript Word Count:** 4502  
53  
54

55 **Figures and Tables:** 6  
56  
57  
58  
59  
60

1  
2  
3  
4  
5  
6  
7  
8  
9  
10  
11  
12  
13  
14  
15  
16  
17  
18  
19  
20  
21  
22  
23  
24  
25  
26  
27  
28  
29  
30  
31  
32  
33  
34  
35  
36  
37  
38  
39  
40  
41  
42  
43  
44  
45  
46  
47  
48  
49  
50  
51  
52  
53  
54  
55  
56  
57  
58  
59  
60

**Number of References: 23**

For peer review only

25 **ABSTRACT**

6 **Objectives:** To combat misinformation, engender trust, and increase health literacy, we developed a  
7 culturally and linguistically appropriate virtual reality (VR) vaccination education platform using  
8 community-engaged approaches within a Somali refugee community.

12 **Design:** Community based participatory research (CBPR) methods including focus group discussions,  
13 interviews, and surveys were conducted with Somali community members and expert advisors to design  
14 the educational content. Co-design approaches with community input were employed in a phased  
15 approach to develop the VR storyline.

19 **Participants:** 60 adult Somali refugees and 7 expert advisors who specialize in healthcare, autism  
20 research, technology development, and community engagement.

26 **Setting:** Somali refugees participated at the offices of a community-based organization, Somali Family  
27 Service, in San Diego, California and online. Expert advisors responded to surveys virtually.

31 **Results:** We find that a CBPR approach can be effectively used for the co-design of a VR educational  
32 program. Additionally, cultural and linguistic sensitivities can be incorporated within a VR educational  
33 program and are essential factors for effective community engagement. Finally, effective VR utilization  
34 requires flexibility so that it can be used among community members with varying levels of health and  
35 technology literacy.

41 **Conclusion:** We describe using community co-design to create a culturally and linguistically sensitive VR  
42 experience promoting vaccination within a refugee community. Our approach to VR development  
43 incorporated community members at each step of the process. Our methodology is potentially  
44 applicable to other populations where cultural sensitivities and language are common health education  
45 barriers.

1  
2  
3  
4  
5  
6  
7  
8  
9  
10  
11  
12  
13  
14  
15  
16  
17  
18  
19  
20  
21  
22  
23  
24  
25  
26  
27  
28  
29  
30  
31  
32  
33  
34  
35  
36  
37  
38  
39  
40  
41  
42  
43  
44  
45  
46  
47  
48  
49  
50  
51  
52  
53  
54  
55  
56  
57  
58  
59  
60

**List of Abbreviations:**

CBPR: Community based participatory research

50 CHW: Community health worker

MMR: Measles, mumps, and rubella vaccination

SFS: Somali Family Service

VR: Virtual reality

For peer review only

1  
2  
3 55 **ARTICLE SUMMARY**  
4

5 **Strengths and Limitations of this Study**  
6

- 7
- 8 ● This work shows that community based participatory research plays an important role in the  
9 creation and customization of health interventions for underserved populations.  
10
  - 11 ● The qualitative aspects of this study provide in-depth information that can help to address  
12 complex vaccine hesitancy issues among Somali refugees.  
13  
14 60 ● Community-engagement methods such as community co-design are effective strategies that  
15 employ the community itself for refugee health promotion and for new technology  
16 development.  
17
  - 18 ● We employed an iterative, phased approach to the development of educational content which  
19 allowed us to continuously assess the project and how it impacted the refugee community.  
20  
21 65 ● This project is a pilot study with a small sample size which will need to be expanded to truly  
22 understand the effect of our virtual reality health innovation on refugee vaccine perceptions and  
23 behaviors.  
24  
25  
26  
27  
28  
29  
30  
31  
32  
33  
34  
35  
36  
37  
38  
39  
40  
41  
42  
43  
44  
45  
46  
47  
48  
49  
50  
51  
52  
53  
54  
55  
56  
57  
58  
59  
60

70



## INTRODUCTION

Over 300,000 refugees enter the United States every year. While refugee resettlement has increased over time, events as recent as 2015 mark one of the largest exoduses of forced human migration, sparking a crisis as countries struggle to cope with the influx and the social and economic demands that coincide with human resettlement [1]. What is largely missing in the public discussion is an appreciation that refugees face extraordinary challenges throughout their migration process from origination to destination. One challenge in particular – the access to proper healthcare - is critical, both for those that have been resettled in the past and those who have recently arrived [2]. The other challenge is to collect and monitor healthcare data that can be accessed and disseminated to resettled communities for public health monitoring [3]. In recognition of these challenges, important questions range from how to efficiently meet the healthcare demands of a growing population that is effective and sustainable to providing an engagement that uses culturally specific resources that simultaneously enhances health education and drives an increased level of trust in the local healthcare system [4].

Upon resettlement in Western countries, many Somali refugees were faced with the widespread diagnosis of autism, a developmental disorder which was unfamiliar to them prior to migration [5]. On one hand, among a community cluster of resettled Somali children in Minneapolis, the prevalence of autism has exceeded 3% and has eclipsed the national average of 1.9% [6]. On the other hand, this specific refugee community was targeted by anti-vaccination activists and the propaganda that vaccination is a cause of autism. This misinformation led to concern by Somali parents and distrust in the healthcare system, which has resulted in a propensity for vaccine hesitancy and non-acceptance [5,6,7]. A lack of effective messaging towards what does cause autism and the dissemination of anti-vaccination propaganda were successful in decreasing vaccination rates in the Somali refugee population in Minnesota from 92% to 42% over the span of a decade [7,8].

1  
2  
3 Effective healthcare education relies on various principles for building essential skills, including  
4  
5 95 communication, assessing the accuracy of information, decision making, planning, goal setting, and self-  
6  
7 management [9]. At its core, health education must be simple, retained, and must be assimilated within  
8  
9 those factors relevant to a given individuals biases and acceptances towards the delivered message [9].  
10  
11 New digital innovations such as virtual reality (VR) has emerged as a tool to provide an enriching and  
12  
13 immersive learning experiences that promote understanding in acute conditions such as anxiety and post-  
14  
15 traumatic stress disorder, and chronic conditions such as tobacco cessation,[10-12]. VR has also been used  
16  
17 100 to provide patients with a more positive experience in hospital settings by using virtual nurses that  
18  
19 patients can relate to [13]. The ability for VR to increase information retention and to change health  
20  
21 behaviors by engaging users in a non-healthcare environment makes VR a potentially valuable platform  
22  
23 for visual health education. Therefore, our primary aim was to develop a customized, culturally and  
24  
25 linguistically appropriate VR educational program specifically focused on pediatric vaccinations, and to  
26  
27 105 leverage community based participatory research models and community co-designs to build, test, and  
28  
29 deploy VR at the community level among a group that are known to be vaccine hesitant or vaccine  
30  
31 resistant.  
32  
33  
34  
35  
36  
37  
38

## 39 110 **METHODS: STUDY DESIGN**

40  
41 SHIFA (Arabic for 'healing') is a community innovation program to design, deploy, and utilize new  
42  
43 healthcare innovations with an inclusive model of community engagement. Within the current program,  
44  
45 community based participation was incorporated along three complementary approaches [14]. These  
46  
47 include:  
48  
49

- 50  
51 115 1) To define the health care access barriers in a resettled refugee community with a focus on  
52  
53 pediatric vaccination.
- 54  
55 2) Incorporate a community-based participatory model to develop the virtual reality content  
56  
57

1  
2  
3 with community member co-design.  
4

- 5 3) Develop a virtual reality environment that is customized with cultural, linguistic, and religious  
6  
7 sensitivities to provide appropriate health education.  
8 120

9  
10 Qualitative feedback was derived through focus group discussions, interviews, and surveys developed by  
11 the investigators and was completed by community members and experts for analysis during each phase  
12 of technology development. Focus groups and interviews were conducted by Najla Ibrahim and Samantha  
13 Streuli. Najla Ibrahim is a Somali woman who holds an MPH degree and is an expert in community public  
14 health issues. Samantha Streuli is a white woman who holds a PhD in anthropology and who has been  
15 working with the Somali community for three years. The majority of focus group and interview  
16 participants were unknown to Samantha and Najla prior to the research project, though some were  
17 acquaintances from previous work within the Somali community.  
18  
19 125  
20  
21  
22  
23  
24  
25  
26  
27  
28  
29

30 130 ***Ethics Approval Statement***

31  
32 This study was approved by The University of California San Diego Institutional Review Board (Protocol  
33 #171434).  
34  
35  
36  
37  
38

39 ***Patient and Public Involvement***

40  
41 135 The Somali community was involved in the research from its inception and were regularly consulted as  
42 the research was developed. Focus groups and interviews with the community informed the development  
43 of research questions, which prioritized the experiences and interests of the Somali community. We  
44 consulted with community members and community leaders when designing and conducting the study  
45 and developing survey, focus group discussion, and interview questions to determine outcome measures.  
46  
47  
48  
49  
50  
51  
52 140 Somali community members were also involved in the recruitment to the study, as much of the  
53 recruitment happened via word-of-mouth. The results of the study will be presented to participants and  
54  
55  
56  
57  
58  
59  
60

1  
2  
3 other community members, who will be further consulted via focus groups on how to best disseminate  
4  
5 results.  
6  
7  
8  
9

## 10 145 **Participants**

### 11 *Inclusion/Exclusion Criteria*

12  
13 We identified groups of Somali individuals for community participation and VR co-design. Participants  
14  
15 were required to be members of the Somali community in San Diego, California who were over the age of  
16  
17 18 and were either 1) Somali refugees; 2) Somali immigrants; or, 3) US-born Somali Americans. We  
18  
19 18 and were either 1) Somali refugees; 2) Somali immigrants; or, 3) US-born Somali Americans. We  
20  
21 150 selected a group of 7 expert advisors to assist in the development of VR. These advisors included: 1)  
22  
23 researchers or other experts in autism and/or vaccination; 2) physicians serving the San Diego Somali  
24  
25 community and in pediatric health; 3) leaders within the Somali community.  
26  
27  
28  
29

### 30 **Setting**

31  
32 155 San Diego County is the 3<sup>rd</sup> largest metropolitan area in California and the 12<sup>th</sup> largest resettlement area  
33  
34 in the United States. The organization responsible for the development and execution of the program is  
35  
36 Somali Family Services (SFS), a fiscal sponsor for the East African Collaborative of 8-community  
37  
38 organizations that aims to outreach, educate, and enroll refugees and immigrants in health insurance  
39  
40 programs. This specific community predominantly resides in City Heights, a subdivision of San Diego  
41  
42 160 County that has a population of 75,000 individuals. Socioeconomic statistics of this region includes a  
43  
44 median household income of \$39,330 (national median \$55,322), 40% are immigrants and/or refugees,  
45  
46 with 31% having an education level of a bachelor's degree or greater [15].  
47  
48  
49  
50

### 51 **Recruitment**

52  
53 Somali individuals were recruited via telephone and through word-of-mouth by Somali Community Health  
54  
55 Workers (CHWs) and peers. As a non-interventional and non-comparative program, we did not determine  
56  
57 165  
58  
59  
60

1  
2  
3 an a priori sample size and identified consecutive participants interested in participating within the  
4  
5 community engagement design. As such, we included any individuals without a predefined minimum or  
6  
7 maximum sample size. In total, we included 60 community participants and 7 expert advisors. Our target  
8  
9 participants were: a) parents of children between 0-2 years of age, b) pregnant, or c) planning to become  
10  
11 pregnant in the next two years; however, we included those Somali community members interested in  
12 170 pregnant in the next two years; however, we included those Somali community members interested in  
13  
14 issues of autism and/or vaccination regardless of parental status. All participants consented to have their  
15  
16 names and contact information collected for future correspondences. This information was securely  
17  
18 stored in an encrypted file and only used to re-contact participants who agree to be re-contacted. The  
19  
20 research objectives, research participants' rights, and description of how data would be used were  
21  
22 explained to all participants prior to participation. All participants provided verbal consent, which was  
23 175 explained to all participants prior to participation. All participants provided verbal consent, which was  
24  
25 approved by The University of California San Diego Institutional Review Board (#171434).  
26  
27  
28  
29

30 Expert advisors were identified by the SHIFA project leadership team according to their particular areas  
31  
32 of specialization. Advisors signed consent forms to participate in the iterative development of educational  
33  
34 180 content.  
35  
36  
37  
38

### 39 ***CBPR and Community Co-Design***

40  
41  
42 Our CBPR approach involved community members in each step in the design, iterative testing, and  
43  
44 development of culturally and linguistically appropriate health education content. This approach to CBPR  
45  
46 185 in the Somali community builds upon public health work previously done within refugee communities  
47  
48 [16]. We developed a community co-design methodology that uses the principles of design thinking  
49  
50 combined with community-based research to enable participants to be directly involved in the design and  
51  
52 creation of content and products that are developed to benefit them [16-17]. This co-design methodology  
53  
54  
55  
56  
57  
58  
59  
60

1  
2  
3 was inclusive in that community members were asked to participate within content curation and to lead  
4  
5 190 certain aspects of VR development.  
6

### 7 ***Phased Approach to Virtual Reality Development***

8  
9  
10 We merged each aspect of CBPR and community co-designs within a phased approach to VR development  
11  
12 (Vendor: INVIVO, Toronto, Canada). These phases included:  
13  
14

15 **Phase 1:** CBPR approaches to assess community needs and concerns important to pediatric vaccination.  
16

17  
18 195 **Phase 2:** VR modality determination for script development. The modality consisted of the type of VR  
19  
20 experience and the script development included the specific educational content.  
21  
22

23 **Phase 3:** VR Prototype and iterative feedback from storyboards, 2- and 3-dimensional animation, and  
24  
25 visual and audio experiences that incorporate VR design elements including those factors that allow users  
26  
27 to engage at different levels of health literacy.  
28  
29

30  
31 200 **Phase 4:** Final VR Product and Testing  
32

33  
34 The objective within VR development was to use those tools and devices that were available to the  
35  
36 community-at-large and to ensure cultural and linguistic sensitivities were incorporated.  
37  
38  
39  
40  
41

### 42 ***Data Collection and Analysis***

43  
44  
45 205 All data were collected electronically via tablet or computer at the time of focus group discussions,  
46  
47 interviews, and surveys. Focus group discussions and interviews were either recorded and transcribed, or  
48  
49 extensive notes were taken on a computer in the event that groups or individuals declined to be recorded.  
50  
51 Focus group discussions took place at the offices of SFS. In total, we conducted 5 focus groups with 57  
52  
53 participants. Some participants attended more than one focus group. Four of the focus groups were  
54  
55  
56  
57  
58  
59  
60

1  
2  
3 210 structured (see supplementary materials for discussion guides), while one was an unstructured discussion  
4  
5 of the prototype. Interviews also took place at the offices of SFS and were conducted with 3 Somali  
6  
7 parents. While the majority of participants were female, we also had a small number of male participants.  
8  
9

10 Analyses were conducted thematically and iteratively using the content of the surveys, focus group  
11  
12 discussions, and interviews during the phased approach for VR development. This approach utilized five  
13  
14 215 steps: 1) familiarization, 2) coding, 3) theme development, 4) defining themes and, 5) reporting [18].  
16  
17 During the process of familiarization, all sections of the interviews, focus group discussions, and surveys  
18  
19 relating to the experience of utilizing VR were extracted. Coding was performed using MAXQDA software.  
20  
21 Emergent themes from each phase of development were defined and reported in order to inform the  
22  
23 subsequent development phases.  
24  
25

26  
27 220 The primary data coder was SAS. To ensure a rigorous evaluation of the data, a subset of transcripts was  
28  
29 also coded by AM. In order to achieve consensus on codes, AM and SAS engaged in recurring discussions  
30  
31 on the coding process. The analysis was further tested during discussions with expert advisors. The  
32  
33 consensus was reviewed and approved by all investigators. Specific quotations were chosen by SAS to  
34  
35 represent emergent themes in the data.  
36  
37

38 225

## 39 40 **RESULTS**

41  
42 This program began in April 2019 and product testing is ongoing. Figure 1 illustrates the phased approach  
43  
44 to development and iterative testing. In total, 67 individuals (7 advisors, 60 Somali community members)  
45  
46 provided feedback during each phase of VR development and participated within the community-co  
47  
48 230 design.  
49  
50  
51  
52  
53  
54  
55  
56  
57  
58  
59  
60

### ***Community-based Participation***

235 The first step in our community engagement process was to hold a series of 3 focus groups exploring  
topics of interest to the Somali community including vaccination, autism, pediatric health, and technology  
(n = 18 Somali community members). We also conducted interviews with 3 Somali parents (see  
supplementary files for interview guide). Based on this initial feedback from the community, the project  
team held a design workshop to create a series of 3 story ideas for the VR. These ideas were then brought  
240 to the Somali community in the form of another design workshop where the community evaluated the  
suitability of the provided stories and suggested changes. 4 Somali community members (2 Somali  
community health workers, 1 Somali woman, and 1 Somali man) participated in this design workshop to  
develop the general framework of a story. Information learned from the community was then used to  
develop a first iteration of a script. This script was then tested for cultural and linguistic suitability and  
245 vaccine-promotion potential with 17 Somali women from ages 26-78 and was followed by a discussion  
with a prominent male community leader to again assess the cultural and linguistic appropriateness of  
the content to promote vaccine education. Finally, a 2-dimensional prototype of the VR animation was  
developed with a Somali voiceover (Figure 2) and was tested with 24 community members in order to  
determine the effectiveness of the messaging in promoting vaccination and to assess cultural and  
250 linguistic elements of the storyline.

### ***Phased Approach to Virtual Reality Technology Development***

***Phase 1:*** CBPR approaches to assess community needs and concerns important to pediatric vaccination

The Somali community focus group discussions were broken up into three separate sessions, each of  
255 which focused on a particular area of community interest (Table 1). The first focus group discussion was



1  
2  
3 centered on health concerns of the community, and participants cited autism as a major concern, as  
4 well as language barriers that pose a significant problem when engaging with the medical system. In  
5  
6 addition, participants brought up issues of trust which were tied to poor communication.  
7  
8  
9

10  
11  
12 260 The second focus group discussion explored issues of pediatric health. Participants provided information  
13 about pregnancy, childbirth, pediatric care, and parenting. The central theme of this focus group  
14 discussion was issues of trust within the medical system, with many mothers indicating that while they  
15 highly valued their doctors' opinions, they also preferred to do their own research. Mothers relayed to  
16 us their desire to receive health education in their own language from a trustworthy doctor.  
17  
18  
19  
20  
21  
22

23 265  
24  
25 The third focus group discussion was centered around issues of vaccination and technology. Participants  
26 once again indicated issues surrounding trust in medical systems and their desire to make their own  
27 educated health decisions. Additionally, participants stated that they would like to receive more  
28 detailed information about how vaccinations work:  
29  
30  
31  
32  
33

34 270  
35  
36 "If they could show how the vaccine works in the child's body and what it does – if it can be  
37 visualized."  
38  
39

40  
41  
42  
43 "That before the vaccines are given to our children, for it to be explained to us what the risks are  
44 - the sided effects, and the benefits. When we compare the two, then make a decision."  
45  
46 275  
47  
48  
49

50 Themes that emerged from interviews with 3 Somali parents also included concerns about autism,  
51 medical trust, and the desire to learn more about vaccination.  
52  
53  
54  
55  
56  
57  
58  
59  
60

1  
2  
3 280  
4  
5**Phase 2:** VR modality determination for script development6  
7  
8  
9  
10  
11  
12  
13  
14  
15  
16 285  
17  
18

*Modality determination:* The project team consulted extensively with Somali CHWs to determine an appropriate modality, and chose 360-video due to the ability of this format to be experienced using virtual reality headsets, smart phones, or computers in order to make this VR program widely accessible to all members of the Somali community.

19  
20  
21  
22  
23  
24  
25  
26  
27  
28 290  
29  
30  
31  
32  
33  
34  
35  
36  
37

*Script development:* Open-ended survey responses from Somali community members regarding the three potential storylines indicated that an older Somali male doctor would be most suitable to deliver health information in our story, as this character would evoke feelings of trust and respect. Somali community members favored a scene where a Somali mother could be shown talking to her doctor – this way they could see themselves as a character in the VR story and could see their questions and concerns being addressed directly. The open-ended survey responses from community advisors indicated a preference for a storyline with a strong focus on family and supported the story concept of a Somali mother asking questions to a trusted physician. This information was used to develop the initial script.

38  
39 295  
40  
41  
42  
43  
44  
45  
46  
47  
48  
49

Six members of the expert advisory board reviewed the initial script. Advisors were asked to answer a series of six open-ended questions and provided insightful answers that assisted with script development (Table 2). Specifically, when advisors were asked for their overall impressions of the story, they stated:

50 300  
51  
52  
53  
54  
55  
56  
57  
58  
59  
60

“Overall, I like how the story flows and the way in which the educational components are presented.”

1  
2  
3  
4  
5 "I like the simplicity of the conversation with its effective focus on the key messaging of the  
6  
7  
8 305 value of the timely vaccination to help raise healthy kids."

9  
10  
11  
12 We conducted a community focus group discussion during the script review process to engage the  
13  
14 community. Seventeen community members were asked to assess how culturally appropriate the  
15  
16 storyline was, what they would like to change, how impactful the story was, and how they would  
17  
18 personally design the content. During this focus group discussion, participants agreed that the story was  
19 310 clear and easy-to-follow; however, as additional questions were asked about story flow, the feedback  
20  
21 turned to autism. We found that even when we did not mention autism, the false association between  
22  
23 autism and the measles, mumps, and rubella vaccine (MMR) came up as a topic of discussion. Many  
24  
25 community members said that they were concerned about autism and the MMR vaccination. One  
26  
27  
28  
29  
30 315 woman asked:

31  
32 "if MMR doesn't cause autism, why did I see my child stop talking immediately after getting the  
33  
34 MMR?"  
35  
36  
37  
38

39 The participants agreed that the VR must address the autism question, and that they would prefer to  
40  
41 320 learn this information from a doctor character in the VR storyline.  
42  
43  
44  
45

46 Community members were also asked to take a brief survey after reviewing the script. This survey  
47  
48 included questions about attitudes toward vaccination as well as vaccination planning. Notably, there  
49  
50 was an 18% increase in participants who endorsed being "very comfortable" with MMR vaccination  
51  
52 325 following script exposure. Additionally, those who said they were "not at all comfortable" with MMR  
53  
54  
55  
56  
57  
58  
59  
60

1  
2  
3 vaccination decreased by 12% following script exposure. There was also a 17% increase in those who  
4 stated they would allow their child to receive the MMR following script exposure (Table 3).  
5  
6

### 7 **Phase 3: VR Prototype and iterative feedback**

8  
9  
10 Three expert advisors provided feedback on the storyboard and prototype that focused on where  
11  
12 330 characters were positioned (i.e. husband next to wife), color scheme, and highlighted the need to describe  
13  
14 the immune system's function in order to retain scientific accuracy in the communication of vaccination  
15  
16 information.  
17  
18

19  
20  
21  
22 The prototype (Figure 2) was tested with the Somali community in the context of an in-person focus group  
23  
24 335 discussion and surveys that took place in person at the SFS offices. Participants in the focus group  
25  
26 discussion were asked a series of open-ended questions about their experience with the prototype. The  
27  
28 primary focus of this discussion was analysis of the storyboards and stylistic elements of the VR experience  
29  
30 (e.g., color preferences, imagery, portrayal of characters). Participants indicated that they highly valued  
31  
32 the Somali voiceover and preferred to include the discussion of autism in the final VR storyline, as its  
33  
34 exclusion would raise more questions for the community. The participants also felt that the father  
35  
36 340 character in the VR storyline seemed somewhat excluded and should be standing near his wife to signal  
37  
38 support.  
39  
40  
41  
42

43 All participants who reviewed the prototype agreed that the inclusion of culturally appropriate characters  
44  
45 and a Somali voiceover maximized the educational experience. 13/24 (54%) participants stated that the  
46  
47 345 prototype made them either more comfortable or much more comfortable with vaccination than they  
48  
49 were before exposure to the prototype. 20/24 (83%) participants stated that they would recommend  
50  
51 MMR vaccination to members of their community following exposure to the prototype. Additionally,  
52  
53 21/24 (88%) said they planned to vaccinate their children following exposure to the prototype.  
54  
55  
56  
57  
58  
59  
60

1  
2  
3  
4  
5  
6 350 *VR design factors:* The key VR design elements that were incorporated within each phase of VR  
7  
8 development include passive, non-intrusive experiences, a dynamic and interactive visualization, and  
9  
10 prompts that promote the user towards self-reflection.  
11  
12  
13  
14  
15

#### 16 **Phase 4: Final Product and Testing**

17  
18  
19 355 The final product is a four minute 360-video animation (<https://youtu.be/NS8GvtxnIk0>) available in Somali  
20  
21 and English languages. It can be viewed online using a tablet, a smart phone, or with VR goggles. Settings  
22  
23 include a Somali home populated by a family, and a doctors' office. In the animation's introduction, we  
24  
25 meet the expectant mother who states that she is expecting her first child and is trying to make decisions  
26  
27 about vaccination. Figure 3 illustrates in screenshots each of the 4 chapters in the VR experience. We plan  
28  
29  
30 360 to test the final product using an A/B testing model with the Somali community wherein the A group  
31  
32 receives the VR education and the B group receives a basic English-language educational video about  
33  
34 vaccination. Both groups will be surveyed before and after exposure to the educational materials to assess  
35  
36 changes in attitude toward vaccination and willingness to vaccinate.  
37  
38  
39  
40  
41  
42

#### 43 365 **DISCUSSION**

44  
45  
46 The main results of the SHIFA program can be summarized as follows: 1) a community  
47  
48 participatory research model can be effectively translated for the co-design of a VR educational program  
49  
50 with community members involved in each phase of technology development; 2) cultural and linguistic  
51  
52 sensitivities can be incorporated within a VR pediatric immunization educational program and are  
53  
54 essential factors for effective community engagement; and 3) effective VR utilization requires flexibility  
55 370  
56  
57  
58  
59  
60

1  
2  
3 that can be used among community members with varying levels of health and technology literacy. To  
4  
5 the best of our knowledge, our VR development is the first such health innovation for vaccination  
6  
7 education designed by a community of refugees known for vaccine hesitancy.  
8  
9  
10  
11  
12

13 **375 *Refugee Learners – Vaccination & Autism***

14  
15  
16 This community has common barriers to effective education such as a lack of information and  
17  
18 information that is not culturally and/or linguistically appropriate to drive understanding [19]. Regarding  
19  
20 immunizations, many parents and caregivers in this community already possess medically inaccurate  
21  
22 information. We have previously determined that within this refugee community the reason not to  
23  
24 immunize has resulted from misinformation and the perception that vaccination results in autism.  
25 **380**  
26  
27 Although MMR vaccination rates have fallen in the Somali community (from 92% to 42% over the span of  
28  
29 a decade [7,8]) rates of autism and pediatric learning impairments have remained high (1:32 Somali  
30  
31 children have autism compared to the national average of 1:54) [20-21]. While these results do not  
32  
33 support the link between vaccination and autism, many parents are still convinced of an association  
34  
35  
36 **385** between MMR and autism. Given these results, it is important to take into consideration the mental and  
37  
38 emotional state and the ideation that arises from associating vaccinations with autism. Within this  
39  
40 community health engagement related to immunization requires education focused on the importance  
41  
42 of vaccinations for newly arrived refugees, and a re-education among those who have previously elected  
43  
44 not to immunize. In this context, we performed a community health assessment and identified the drivers  
45  
46  
47 **390** for a low rate of vaccination in the Somali community ranging from cultural and language barriers, distrust  
48  
49 in the healthcare system, and the misinformation that vaccination results in autism. Recognizing these  
50  
51 drivers for low immunization rates in this community, our observations for the mechanisms for how VR  
52  
53 affects behavior changes include: content that is culturally relevant, stimulates an awareness and  
54  
55  
56  
57  
58  
59  
60

1  
2  
3 expectation for what vaccines do and do not do, and provides an immersive experience leading to  
4  
5 395 information retention [22].  
6  
7  
8  
9

### 10 11 ***VR CBPR and Co-Designs*** 12

13  
14 In addition to the mechanisms for how VR affects behavioral change, several design factors must  
15  
16 be maintained when considering who interacts with the VR technology and especially among immigrants  
17  
18 400 that may have varying levels of health and digital literacy. Within our program, most community members  
19  
20 experienced a positive interaction with VR. There are several plausible reasons for our observations.  
21  
22 Through community co-designs, we leveraged key design factors including a non-intrusive experience  
23  
24 (users learn in their own environment), a passive interaction (content that is visual, audio, and depicted  
25  
26 versus reading), a dynamic storyline that builds upon previous experiences and uses known environments,  
27  
28  
29 405 and promotes self-reflection by allowing the user to introspect and contemplate during the VR experience.  
30  
31  
32  
33

34 Because we recognized the importance of culturally and linguistically appropriate educational  
35  
36 materials to deal with issues of low health literacy and medical distrust, we included community-based  
37  
38 approaches in each phase of our development. The results of focus groups and surveys conducted within  
39  
40  
41 410 the community revealed several important considerations for the development of our VR storyline. For  
42  
43 instance, community members were much more comfortable receiving information from a trusted doctor  
44  
45 character. Community members also felt it necessary to include direct and clear information about the  
46  
47 lack of relationship between autism and vaccination in our storyline. This was in contrast to our  
48  
49 expectation and that doing so would reinforce this misinformation. Following design workshops with the  
50  
51  
52 415 Somali community, we tested the program that they helped to co-design within the community in order  
53  
54 to address its cultural and linguistic appropriateness as well as its ability to promote vaccination behavior.  
55  
56  
57  
58  
59  
60

1  
2  
3 We also tested the VR storyline with a team of subject matter experts who evaluated the scientific  
4 accuracy and usability of our design. In our community testing, we found that many Somali community  
5 members felt the VR storyline engendered trust, was relatable, was educational, and was convincing.  
6  
7  
8  
9  
10 420 Several focus group and survey participants stated that they planned to vaccinate and to recommend  
11 vaccination to others following exposure to the VR. Our testing with our panel of experts found that our  
12 content was user-friendly, easy to understand, and scientifically accurate.  
13  
14  
15  
16

17 While we appreciate that community co-designs are an important methodology for how a new  
18 technology is designed, a foundation of CBPR is necessary to harness community involvement. To employ  
19  
20  
21 425 CBPR, we engaged community members throughout every step of the process. Before developing the idea  
22 for the VR storyline, we engaged the community in a series of three focus groups to better understand  
23 their needs, strengths, and interest in collaboration. Focus group discussion questions were open-ended  
24 and allowed for participants to bring their interests and concerns into the conversation. Information  
25 learned from these engagements was used to begin to develop the culturally and linguistically appropriate  
26  
27  
28  
29  
30  
31  
32 430 storyline for the VR. Community members were also continuously engaged throughout the development  
33 of the VR storyline through community co-design.  
34  
35  
36  
37  
38  
39

40 It is our plan to leverage the educational curriculum as well in future deployments of VR. Due to  
41 the constraints of COVID-19, we are currently exploring the possibilities of using telehealth and other  
42  
43  
44 435 digital communication platforms to safely and effectively deploy the VR into the community. Addressing  
45 vaccine hesitancy is especially relevant within the context of COVID-19, as vaccination rates for  
46 preventable diseases have dropped significantly since the beginning of the COVID-19 crisis [23]. There are  
47 also concerns about the potential of misinformation related to COVID-19 vaccination that is especially  
48 relevant for an underserved community that is largely excluded from vaccine clinical trials and  
49  
50  
51  
52  
53  
54  
55 440 communities that have a history of vaccine hesitancy.  
56  
57  
58  
59  
60



### **Limitations**

Our community feedback and focus group represents a convenience sample for those that are more apt towards vaccine acceptance, and therefore may not completely capture all concerns among those who are vaccine hesitant. While this represents a potential selection bias, our method to include a wide range of community members as well as internal and external advisors may enhance internal validity by incorporating a heterogeneous group for community input. Community based participation and community co-designs at each stage of VR development from the initial idea through completion of a VR animation may enhance external validation by including the key components related to cultural and linguistic sensitivities within the phased approach for VR development. COVID-19 impacted our abilities to recruit more participants and to test our final VR experience within the community in the way that we had initially planned to. We are attempting to mitigate this limitation by administering online surveys in the Somali community after they view the VR at home; however, this may limit the quality of our data as most individuals do not have VR headsets at home and may not get the full immersive effect without them. Finally, a perceived shift from vaccine hesitancy to vaccine acceptance at this point is subjective and requires real-world validation and prospective follow-up confirming vaccine delivery.

### **CONCLUSION**

We employed community-based participatory approaches, and community co-design to develop an innovative vaccine educational technology with Somali refugees using VR. By combining new technology-enabled approaches with the needs, interests, and expertise of Somali community members, we have created a methodology that can address vaccination beliefs and behaviors in a vaccine hesitant refugee population. Future research will include an assessment of the efficacy of the VR platform on

1  
2  
3 vaccination rates over time, as well as continued community engagement for the development of  
4  
5 465 additional VR content which can increase health literacy within underserved populations.  
6  
7  
8  
9

## 10 11 **ACKNOWLEDGEMENTS** 12 13

14 We first extend our sincerest gratitude to the Somali community for their inspiring engagement in this  
15  
16 project. Next, we would like to thank Fadumo Jama, Ahmed Dahir, and Sahra Nor for their assistance with  
17  
18 470 participant recruitment, facilitation of community engagements, and translation and interpretation  
19  
20 services. Finally, we are grateful to Dr. Ahmad Bailony and Karen Henken for their guidance and input on  
21  
22 this project.  
23  
24  
25  
26  
27  
28

## 29 **CONTRIBUTORSHIP STATEMENT** 30 31

32 475 SS, NI, and AM contributed to the collection and analysis of data for this work. SS and SB contributed to  
33  
34 the initial drafting of the manuscript. SS, NI, MS, ME, IS, MSa, AS, and SB contributed to the conception  
35  
36 and design of the work. All authors (SS, NI, AM, MS, ME, IS, CF, MSa, DM, KE-M, RT, AM, AL, EC, AS, and  
37  
38 SB) contributed to the interpretation of the data, revising the work critically for important intellectual  
39  
40 content, providing final approval of the version to be published, and all agree to be accountable for all  
41  
42 480 aspects for the work in ensuring that questions related to the accuracy or integrity of any part of the work  
43  
44 are appropriately investigated and resolved. The funders had no role in the design and conduct of the  
45  
46 study; collection, management, analysis, and interpretation of the data; preparation, review, or approval  
47  
48 of the manuscript; and decision to submit the manuscript for publication.  
49  
50  
51  
52  
53  
54

55 485  
56  
57  
58  
59  
60

## COMPETING INTERESTS

Carrie Farrell was a paid consultant on the project from inception until August of 2019. Alex Marchetti is a former employee of technology partner INVIVO and her engagement with the project began while she was with that organization in 2018. Sanjeev Bhavnani discloses Scripps Clinic Grants for clinical trials related to machine learning and technology designs in cardiovascular imaging, being a Pfizer Health Information Technology Advisory Board member on strategies related to health information technology, being a Bristol Meyers Squibb Digital Health Advisory board member on strategies related to digital health technologies, being an Anthem AI Consultant on projects related to cardiovascular care, being a Proteus Health Chair DSMB on digital medication monitoring in hepatitis C, being an American College of Cardiology Innovations Advisory Group Principal investigator and committee member on various innovation projects in cardiovascular care, having Analytics4Life Stock options as a scientific advisor on artificial intelligence in cardiovascular diagnostics, and having Blumio Stock options as a scientific advisor on new technology designs in hypertension. Markie Esmailian discloses US patents in Illumesense Inc., using data analytics and machine learning algorithms for clinical decision support for alternative health therapies. Markie Esmailian is also Founder of IllumeSense Inc. as majority shareholder and principle. Ahmed Sahid, Najla Ibrahim, and Samantha Streuli were all paid employees of Somali Family Service at the time of this research. Alia Mohamed was also a paid research assistant for this project. All other authors declare that they have no relevant or material financial interests that relate to the research described in this paper.

## FUNDING

Alliance Healthcare Foundation Grant #18-34728477.

**DATA SHARING STATEMENT**

510 Data are deidentified participant data and are available from the corresponding author upon request.

Reuse is not permitted.

For peer review only

## REFERENCES

- 1  
2  
3  
4  
5  
6 515 1. Nicolai T, Fuchs O, von Mutius E. Caring for the Wave of Refugees in Munich. *N Engl J Med*. 2015  
7  
8 Oct 22;373(17):1593-5. doi: 10.1056/NEJMp1512139. Epub 2015 Sep 23. PMID: 26397950.  
9  
10  
11 2. Kumar R. Refugee Articulations of Health: A Culture-Centered Exploration of Burmese Refugees'  
12  
13 Resettlement in the United States. *Health Commun*. 2020 Jan 13:1-11. doi:  
14  
15 10.1080/10410236.2020.1712035. Epub ahead of print. PMID: 31931620.  
16  
17 520 3. Westgard B, Martinson BC, Maciosek M, Brown M, Xu Z, Farah F, Ahmed O, Dalmar A, Dubois D,  
18  
19 Sanka L, Pryce D. Prevalence of Cardiovascular Disease and Risk Factors Among Somali Immigrants  
20  
21 and Refugees. *J Immigr Minor Health*. 2020 Sep 17. doi: 10.1007/s10903-020-01078-3. Epub  
22  
23 ahead of print. PMID: 32940817.  
24  
25  
26 4. Shadmi E, Chen Y, Dourado I, Faran-Perach I, Furler J, Hangoma P, Hanvoravongchai P, Obando C,  
27  
28 525 Petrosyan V, Rao KD, Ruano AL, Shi L, de Souza LE, Spitzer-Shohat S, Sturgiss E, Suphanchaimat R,  
29  
30 Uribe MV, Willems S. Health equity and COVID-19: global perspectives. *Int J Equity Health*. 2020  
31  
32 Jun 26;19(1):104. doi: 10.1186/s12939-020-01218-z. PMID: 32586388; PMCID: PMC7316580.  
33  
34  
35 5. Decoteau CL. The "Western disease": Autism and Somali parents' embodied health movements.  
36  
37  
38 *Soc Sci Med*. 2017 Mar;177:169-176. doi: 10.1016/j.socscimed.2017.01.064. Epub 2017 Feb 1.  
39  
40 530 PMID: 28171816.  
41  
42 6. Henneberry, S. University of Minnesota estimates autism spectrum disorder (ASD) in Somali and  
43  
44 non-Somali children in Minneapolis. Press Release. 16 Dec 2013.  
45  
46 [https://rtc.umn.edu/autism/doc/Somali\\_Autism\\_study\\_press\\_release.pdf](https://rtc.umn.edu/autism/doc/Somali_Autism_study_press_release.pdf)  
47  
48  
49 7. Dyer, O. Measles Outbreak in Somali American Community Follows Anti-Vaccine Talks. *BMJ*. 2017  
50  
51 535 May 16: DOI:10.1136/bmj.j2378.  
52  
53 8. Hviid A, Hansen JV, Frisch M, Melbye M. Measles, Mumps, Rubella Vaccination and Autism. *Ann*  
54  
55 *Intern Med*. 2019;170(8):513-520. doi:10.7326/M18-2101.  
56  
57  
58  
59  
60

- 1  
2  
3  
4  
5  
6  
7  
8 540  
9  
10  
11  
12  
13  
14  
15  
16  
17  
18  
19 545  
20  
21  
22  
23  
24  
25  
26  
27  
28  
29  
30 550  
31  
32  
33  
34  
35  
36  
37  
38  
39  
40  
41 555  
42  
43  
44  
45  
46  
47  
48  
49  
50  
51  
52 560  
53  
54  
55  
56  
57  
58  
59  
60
9. Nabulsi M, Harris J, Letelier L, Ramos K, Hopayian K, Parkin C, Porzsolt F, Sestini P, Slavin M, Summerskill W. Effectiveness of education in evidence-based healthcare: the current state of outcome assessments and a framework for future evaluations. *Int J Evid Based Healthc*. 2007 Dec;5(4):468-76. doi: 10.1111/j.1479-6988.2007.00084.x. PMID: 21631807.
  10. Merchant Z, Goetz ET, Cifuentes L, Keeney-Kennicutt W, Davis TJ. Effectiveness of Virtual Reality-Based Instruction on Students' Learning Outcomes in K-12 and Higher Education: A meta-analysis. *Computers & Education*. Jan 2014. DOI: 10.1016/j.compedu.2013.07.033.
  11. Psotka J. Immersive Training Systems: Virtual reality and education and training. *Instructional Science*. 1995. DOI: 10.1007/BF00896880.
  12. Riva G, Baños RM, Botella C, Mantovani F, Gaggioli A. Transforming Experience: The potential for augmented reality and virtual reality for enhancing personal and clinical change. *Psychiatry*. 30 September 2016. DOI: 10.3389/fpsy.2016.00164.
  13. Zhou S, Bickmore T, Paasche-Orlow M, Jack B. Agent-User Concordance and Satisfaction with a Virtual Hospital Discharge Nurse. In: Bickmore T., Marsella S., Sidner C. (eds) *Intelligent Virtual Agents*. IVA 2014. Lecture Notes in Computer Science, vol 8637. 2014. DOI: 10.1007/978-3-319-09767-1\_63.
  14. Bhavnani SP, Narula J, Sengupta PP. Mobile technology and the digitization of healthcare. *European Heart Journal*. 7 May 2016. DOI: 10.1093/eurheartj/ehv770.
  15. City Heights Demographics and Statistics. (n.d.). Retrieved October 26, 2020, from <https://www.niche.com/places-to-live/n/city-heights-san-diego-ca/residents/>
  16. Fisher KE, Yefimova K, and Yafi E. Future's Butterflies: Co-Designing ICT Wayfaring Technology with Refugee Syrian Youth. In *Proceedings of the The 15th International Conference on Interaction Design and Children (IDC '16)*. 2016. DOI: 10.1145/2930674.2930701.

- 1  
2  
3 17. Israel BA, Schulz AJ, Parker EA, Becker AB. Review of community-based research: assessing  
4 partnership approaches to improve public health. *Annu Rev Public Health*. 1998;19:173-202. doi:  
5 10.1146/annurev.publhealth.19.1.173. PMID: 9611617.  
6  
7  
8  
9  
10 18. Miles MB, Huberman AM. *Qualitative data analysis: An expanded sourcebook*. sage; 1994 Jan 12.  
11  
12 565 19. Kim W, Kim I, Baltimore K, Imtiaz AS, Bhattacharya BS, Lin L. Simple contents and good readability:  
13 Improving health literacy for LEP populations. *Int J Med Inform*. 2020 Jul 11;141:104230. doi:  
14 10.1016/j.ijmedinf.2020.104230. Epub ahead of print. PMID: 32688291.  
15  
16  
17  
18 20. Maenner MJ, Shaw KA, Baio J, et al. Prevalence of Autism Spectrum Disorder Among Children  
19 Aged 8 Years — Autism and Developmental Disabilities Monitoring Network, 11 Sites, United  
20 States, 2016. *MMWR Surveill Summ* 2020, 69 (No. SS-4): 1-12.  
21 570  
22  
23 21. Hewitt A, Hall-Lande J, Hamre K, Esler AN, Punyko J, Reichle J, Gulaid A. Autism Spectrum Disorder  
24 (ASD) Prevalence in Somali and Non-Somali Children. *J Autism Dev Disord* 2016;2599-2608. DOI  
25 10.1007/s10803-016-2793-6.  
26  
27  
28  
29  
30  
31  
32 22. Diemer J, Alpers GW, Peperkorn HM, Shiban Y, Mühlberger A. The impact of perception and  
33 presence on emotional reactions: a review of research in virtual reality. *Front Psychol*. 2015;6:26.  
34 575  
35 Published 2015 Jan 30. doi:10.3389/fpsyg.2015.00026.  
36  
37  
38  
39 23. Santoli JM, Lindley MC, DeSilva MB, et al. Effects of the COVID-19 Pandemic on Routine Pediatric  
40 Vaccine Ordering and Administration — United States, 2020. *MMWR Morb Mortal Wkly Rep*  
41 2020;69:591–593. DOI: <http://dx.doi.org/10.15585/mmwr.mm6919e2external icon>.  
42  
43  
44  
45  
46 580  
47  
48  
49  
50  
51  
52  
53  
54  
55  
56  
57  
58  
59  
60

**TABLE 2. Questions and Responses from Project Advisors**

| Questions Asked to Advisors | Salient Responses |
|-----------------------------|-------------------|
|-----------------------------|-------------------|

## TABLES

**TABLE 1. Focus Group Questions and Responses from Somali Community**

| Category and Questions for Community Members                                               | Salient Responses                                                                                                                                                                                                                                                                                                                                                                                                             |
|--------------------------------------------------------------------------------------------|-------------------------------------------------------------------------------------------------------------------------------------------------------------------------------------------------------------------------------------------------------------------------------------------------------------------------------------------------------------------------------------------------------------------------------|
| <b>Session 1: General Health</b>                                                           |                                                                                                                                                                                                                                                                                                                                                                                                                               |
| <b>Examples of questions asked in focus groups</b>                                         |                                                                                                                                                                                                                                                                                                                                                                                                                               |
| “What are some of your community’s biggest health concerns in the U.S.?”                   | “Autism.”<br>“One of the biggest health problems that people have that I forgot to mention is that most people don't understand a lot of English.”                                                                                                                                                                                                                                                                            |
| “What do you find not trustworthy within the health care system?”                          | “Lack of good communication...especially in primary language.”<br>“Health insurance!”                                                                                                                                                                                                                                                                                                                                         |
| <b>Session 2: Pediatric Health</b>                                                         |                                                                                                                                                                                                                                                                                                                                                                                                                               |
| <b>Examples of Questions asked in focus groups</b>                                         |                                                                                                                                                                                                                                                                                                                                                                                                                               |
| “Do you trust your doctor’s recommendations for your child’s health?”                      | “Yes, whatever recommendation the doctor gives me, I have to take it.”<br>“I mean I always think it's obviously for a good reason, but for me, I think I always do my own research before I automatically assume that's what's best for me. If it's something very serious like [the doctor] saying for example 'you need a surgery,' that [I] automatically would be like 'let me get another opinion from another doctor.’” |
| <b>Session 3: Vaccination</b>                                                              |                                                                                                                                                                                                                                                                                                                                                                                                                               |
| <b>Examples of questions asked in focus groups</b>                                         |                                                                                                                                                                                                                                                                                                                                                                                                                               |
| “What are the topics or things that you would like to know about in relation to vaccines?” | “If they could show how the vaccine works in the child’s body and what it does – if it can be visualized.”<br>“That before the vaccines are given to our children, for it to be explained to us what the risks are - the sided effects, and the benefits. When we compare the two, then make a decision.”                                                                                                                     |

585

**Table 1:** Sample questions and salient responses from exploratory focus groups indicated that parents were very concerned about autism and that they found it difficult to trust the healthcare system due to lack of communication in their primary language. While parents trusted certain doctors, they also highlighted the importance of doing their own research to understand their children’s health. Parents also expressed a desire to understand how vaccines work within the body and what the risks and benefits are of vaccination.

590



|                                                                                                                                                                    |                                                                                                                                                                                                                                                                                                                                                |
|--------------------------------------------------------------------------------------------------------------------------------------------------------------------|------------------------------------------------------------------------------------------------------------------------------------------------------------------------------------------------------------------------------------------------------------------------------------------------------------------------------------------------|
| <p>1) What are your overall impressions of the story? What did you like the most about the story? Is there anything that you think should change in the story?</p> | <p>“Overall, I like how the story flows and the way in which the educational components are presented. I also think it’s a great idea to have the story centered around a meal, as it seems culturally relevant and helps make the situation relatable to users.”</p>                                                                          |
| <p>2) Have you noticed any inaccuracies in scientific and medical facts in the story?</p>                                                                          | <p>“Based on my past feedback, I am glad that this story has been selected. I like the simplicity of the conversation with its effective focus on the key messaging of the value of the timely vaccination to help raise healthy kids.”</p>                                                                                                    |
| <p>3) Was the story clear and easy to understand? Did the story flow naturally?</p>                                                                                | <p>“No.”</p> <p>“No, from my knowledge all of the content presented is accurate.”</p>                                                                                                                                                                                                                                                          |
| <p>4) Was the story culturally appropriate? Was the cultural component balanced throughout?</p>                                                                    | <p>“Very clear and flowed in a way we would use in teaching in general. Very logical progression of information.”</p> <p>“Yes, the story is clear and flows very naturally.”</p>                                                                                                                                                               |
| <p>5) Was the story convincing? Does it have a potential to change attitudes of vaccine hesitant parents?</p>                                                      | <p>“One of the things I liked about this story is the emphasis of the great Somali family bond that can be pivotal in achieving the goals of this project to leverage the great trust Somali parents put on their relative and educated community members.”</p> <p>“Yes, the story was culturally relevant and appropriate.”</p>               |
| <p>6) In your opinion, does the story increase knowledge?</p>                                                                                                      | <p>“I think it gives the information about immunization, the science behind it, and does not focus on the controversies, which have not been supported by medical data.”</p> <p>“Yes. I would just make sure we really take advantage of VR when we show the visuals inside the body and how vaccine’s function within the immune system.”</p> |
|                                                                                                                                                                    | <p>“Yes, it stays with the facts in a positive way, in a healthy environment with the families.”</p> <p>“It can, depending on the background of the parents and audience and their desire to benefit from such educational program.”</p>                                                                                                       |

**Table 2:** Sample questions and salient responses from engagement with project advisors. Advisors enjoyed the clarity and flow of the storyline as well as finding it culturally relevant and appropriate. They also believed that the story had significant potential to increase vaccine knowledge.

**TABLE 3: Survey following initial script exposure**

| How comfortable are you with MMR vaccination? | %   | How comfortable are you with MMR vaccination? | %    | Would you get MMR for your child? | %   | Would you get MMR for your child? | %    |
|-----------------------------------------------|-----|-----------------------------------------------|------|-----------------------------------|-----|-----------------------------------|------|
| Very comfortable                              | 52% | Very comfortable                              | 70%+ | Yes, I would                      | 65% | Yes, I would                      | 82%+ |
| Somewhat comfortable                          | 24% | Somewhat comfortable                          | 18%- | I would consider it               | 23% | I would consider it               | 12%- |
| Not at all comfortable                        | 24% | Not at all comfortable                        | 12%- | I don't know                      | 6%  | I don't know                      | 0%-  |
|                                               |     |                                               |      | No, I would not                   | 6%  | No, I would not                   | 6%   |

**Table 3:** This table shows the results of a survey of 17 Somali mothers following exposure to the initial script for the VR. + indicates % increased following exposure to the script, - indicates % decreased following exposure to the script.

600

605

610

**FIGURES**

615

**Figure 1:** Phased approach to VR development. Assessment of community needs began in April 2019 in advance of the development of the VR. Iterative testing took place throughout 2019 and 2020, with some gaps in testing due to the restrictions of the COVID-19 pandemic. The final VR product has been completed as of June 2020 and is currently being tested with the Somali community.

620

**Figure 2:** Still frame from prototype. The prototype consisted of a motion storyboard with a voiceover which was translated into Somali for presentation to the community.

625

630

**Figure 3:** Top row: Chapters 1 and 2 of the VR story. Bottom row: Chapters 3 and 4 of the VR story. In chapter 1 of the animation, the expectant mother, her husband, and her sister visit the doctor's office and learn about measles, mumps, and rubella (MMR). In chapter 2, the family learns how the immune system works. In chapter 3, the family learns from the doctor what the MMR vaccine does and how it works. In Chapter 4, the doctor explains to the family the risks and benefits of MMR vaccination, including a statement debunking the association between autism and vaccination. Finally, the 360-degree video concludes by showing the new mother and her family – including the new, healthy baby – and the new mother states that after learning all the facts, she has decided to vaccinate her child.

635

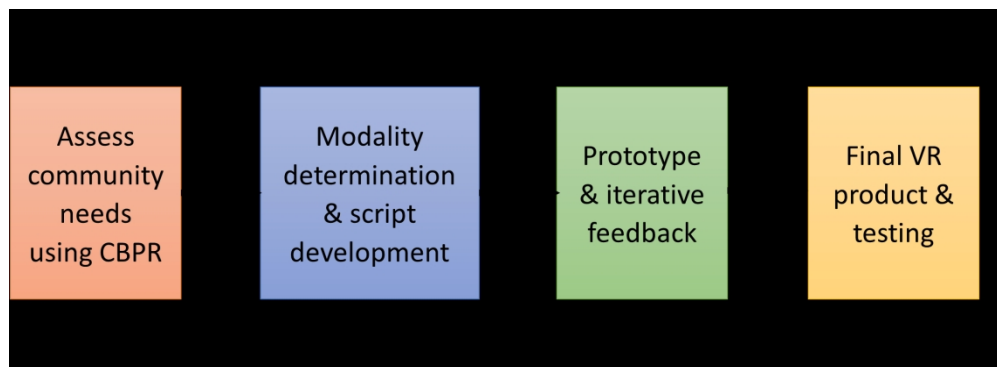

Phased approach to VR development. Assessment of community needs began in April 2019 in advance of the development of the VR. Iterative testing took place throughout 2019 and 2020, with some gaps in testing due to the restrictions of the COVID-19 pandemic. The final VR product has been completed as of June 2020 and is currently being tested with the Somali community.

1  
2  
3  
4  
5  
6  
7  
8  
9  
10  
11  
12  
13  
14  
15  
16  
17  
18  
19  
20  
21  
22  
23  
24  
25  
26  
27  
28  
29  
30  
31  
32  
33  
34  
35  
36  
37  
38  
39  
40  
41  
42  
43  
44  
45  
46  
47  
48  
49  
50  
51  
52  
53  
54  
55  
56  
57  
58  
59  
60

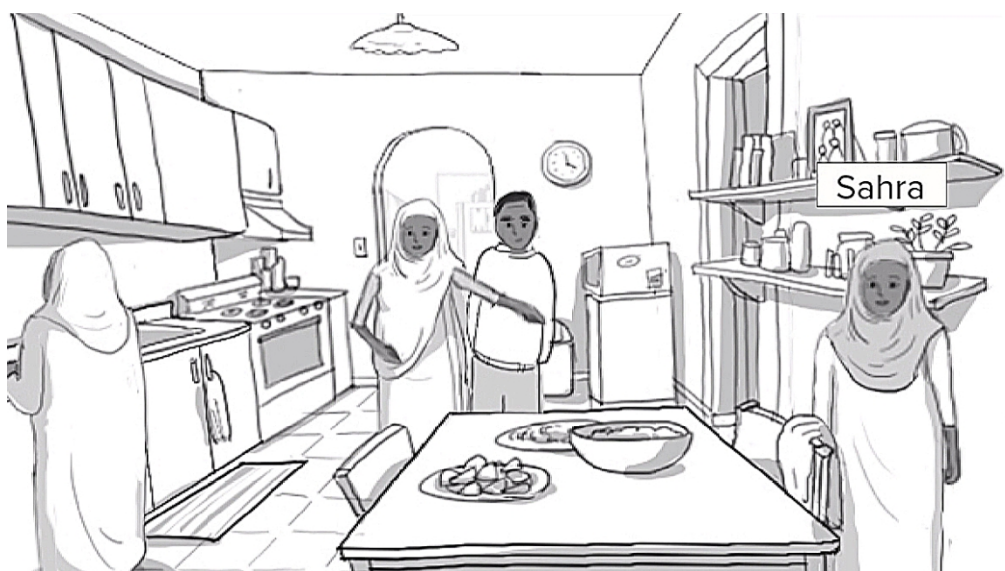

Still frame from prototype. The prototype consisted of a motion storyboard with a voiceover which was translated into Somali for presentation to the community.

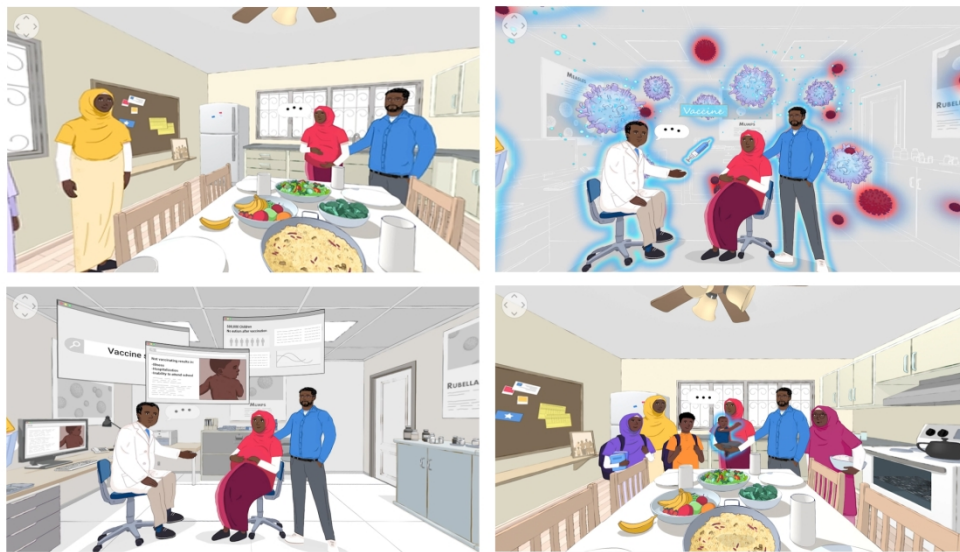

Top row: Chapters 1 and 2 of the VR story. Bottom row: Chapters 3 and 4 of the VR story. In chapter 1 of the animation, the expectant mother, her husband, and her sister visit the doctor's office and learn about measles, mumps, and rubella (MMR). In chapter 2, the family learns how the immune system works. In chapter 3, the family learns from the doctor what the MMR vaccine does and how it works. In Chapter 4, the doctor explains to the family the risks and benefits of MMR vaccination, including a statement debunking the association between autism and vaccination. Finally, the 360-degree video concludes by showing the new mother and her family – including the new, healthy baby – and the new mother states that after learning all the facts, she has decided to vaccinate her child.

### **Focus Group 1 Discussion Guide**

#### **Questions about health in Somalia and refugee camps:**

1. Q: What was your opinion of healthcare in Somalia?
2. Q: Did you receive health education (in Somalia)? What kind?
3. Q: If you spent time in a refugee camp, were you provided health services there?
4. Q: What kind of health services did you receive in Somalia (e.g. preventative, emergency, obstetric, etc.)?

#### **Questions about resettlement process**

1. Q: Were you provided with health services and/or screening as part of the resettlement process?
2. Q: Were you provided with health education as part of the resettlement process? What kind?
3. Q: If you have children, were you offered healthcare services for your children? What kind?

#### **Questions about healthcare in the US**

1. Q: What kinds of healthcare services have you received in the US (e.g. preventative, emergency, obstetric, etc.)?
2. Q: For what health conditions are you most likely to seek medical care?
3. Q: Where do you go for healthcare services?
4. Q: If you have children, what kind of healthcare services have they received?
5. Q: Have you received health education or information (in the US)? (From whom, about what?)
6. Q: What are some of your community's biggest health concerns in the US? Mental (or Autism)? Physical? Chronic Conditions?
7. Q: Who is the decision-maker in your household for health care?
8. Q: What sources of information do you use to make healthcare-related decisions? (e.g. family, friends, religious leaders, doctors, healthcare workers)
9. Q: Do you trust your healthcare provider and his/her guidance/recommendations?

10. Q: Is there any part/aspect of the healthcare system in the US that you do not find completely trustworthy?
11. Q: Who does your community (not just you) go to for healthcare? (who is trusted?) Are there specific hospitals people go to?

---

## **Focus Group 2 Discussion Guide**

### **Introductory Questions**

1. Do you have children (under 18 years old)? How many? What are their ages?

### **Prenatal Health Questions**

1. If you've had children, did you experience your pregnancies here in the United States?
2. What is prenatal care? What do you know about prenatal care?
3. How do you feel about c-sections? (I ask because women seem to bring this up a lot and it is mentioned often in literature around Somali women's birth experiences in Western countries)
4. What did you learn through prenatal care that was valuable to your child rearing?
5. Where did you give birth? Where do mothers in your family or friends give birth?

### **Pediatric Health Questions**

1. What do you know about pediatric (infant and childhood) health? Where do you get information about pediatric health (friends, family, internet, social media, doctors, etc.)?
2. How do you make decision about your child's healthcare?
3. Do What does the phrase "stages of development" mean to you? (If they're not sure we could explain and then ask the next part) What do you think the "stages of development" for children are? When do they happen?
4. Where do people learn about stages of development?
5. Who (or where) do your children go to see for healthcare?
6. When do you take your children to their doctor? How old are they typically? Yearly visits? How often? (routine preventive care, health and developmental guidance, screening for health conditions, treatment of acute and chronic conditions, and injury care)
7. What is a healthy child?



- 1
  - 2
  - 3
  - 4
  - 5
  - 6
  - 7
  - 8
  - 9
  - 10
  - 11
  - 12
  - 13
  - 14
  - 15
  - 16
  - 17
  - 18
  - 19
  - 20
  - 21
  - 22
  - 23
  - 24
  - 25
  - 26
  - 27
  - 28
  - 29
  - 30
  - 31
  - 32
  - 33
  - 34
  - 35
  - 36
  - 37
  - 38
  - 39
  - 40
  - 41
  - 42
  - 43
  - 44
  - 45
  - 46
  - 47
  - 48
  - 49
  - 50
  - 51
  - 52
  - 53
  - 54
  - 55
  - 56
  - 57
  - 58
  - 59
  - 60
8. What type of problems or challenges have you experienced with your own children when it comes to their health? What about in your community?
9. What barriers might prevent you from seeking or accessing healthcare for your children?
10. Do you have any advice or tips for young mothers and their young children when it comes to their healthcare?
11. If you were to watch educational video about pediatric health, how would you prefer to access or watch that?
12. How would you like to receive information about infant and child health in the future? (maybe give some options like using technology, watching videos, attending health fairs, attending workshops, formal classes, advice from doctors, etc.)
- 

### **Focus Group 3 Discussion Guide**

#### **Questions about Vaccine Knowledge and Attitudes:**

1. From your understanding, what are vaccinations for? What are their benefits? How do they work?
2. Do you understand how the vaccination works in your body?
3. Are vaccines effective against diseases/illnesses?
4. What information have you received about vaccinations and where?
5. Do you feel that the information you received was enough to make a good decision?
6. What information is missing that you would like to know about vaccination?
7. Do you feel like you get better information about vaccinations when you have a translator or someone like this present?
8. When did you first get vaccinated?
9. When did your children first get vaccinated? Why did you vaccinate them (i.e. school requirement)?
10. Why did you vaccinate (did school, doctors tell you?)
9. Why did you vaccinate in the US?
10. Where did you get vaccinated?

- 1  
2  
3 11. If you were not told by a doctor or school to get vaccinated (prompted by someone else), would you  
4 still vaccinate your children and why?  
5  
6  
7 12. As you might know, vaccines are conducted based on a schedule (based on age of child) – what are  
8 your thoughts about the schedule? Frequency of the shots children are getting?  
9  
10 13. What do you think about frequency, amount, timing of shots?  
11  
12 14. Have you heard of parents delaying vaccinations for their children?  
13

14 **Questions about Anti-Vaccination:**

- 15  
16  
17 15. Have you heard the recent news about disease outbreaks in the US caused by unvaccinated  
18 children?  
19  
20 16. If so, where did you hear that information? What are your thoughts about that?  
21  
22 17. What are reasons people decline vaccinations?  
23  
24 18. Are vaccines related to or a cause of any illness (besides autism)?  
25  
26 19. Do you know others in the community who are hesitant about vaccinations?  
27  
28

29 **Questions about Technology:**

- 30  
31 20. If we were to create something educational for you and your community, what would be the best  
32 way to teach?  
33  
34 21. If you were to design the VR program what would you do or show?  
35  
36 22. What kinds of experiences would you like to see? How vaccines work? Simulated interaction with  
37 healthcare provider?  
38  
39  
40  
41
- 

42  
43  
44 **Script Review Focus Group Discussion Guide**

- 45  
46 1) What were your overall impressions of the script?  
47  
48 2) Does the script have the potential to impact your community's beliefs about autism and vaccination?  
49  
50 3) What did you like about the script?  
51  
52 4) What would you change about the script?  
53  
54 5) Is there anyone or anything that you think is missing from the script?  
55
-

## Parent Interview Guide

### Introductory Questions:

1. How old are you?
2. Do you have children? How many children do you have?
3. Are you married?
4. How long have you been in the US?

### Interview Questions:

1. Where or who do you generally get your medical information from? Why?
2. What is autism?
3. From your understanding, what causes autism?
4. Do you know anyone in your community who has autism?

#### If their child:

1. Were you familiar with autism prior to your child's diagnosis?
  2. What signs or behaviors have caused you to seek medical help for your child?
  3. Can you explain the process of receiving an autism diagnosis for your child?
  4. What challenges have you faced as a parent of an autistic child?
  5. What challenges has your child faced as a child with autism?
  6. What treatments have you used to manage your child's autism?
5. How do people in your community view or understand autism?
  6. Is there anything you would like to know or understand about autism?
  7. How do you feel about vaccinations?
  8. Would you, or have you, vaccinated your children? Why did you make that choice?
    - Have you been made aware that vaccination and immunization records are now required for children to attend school in San Diego? How do you feel about that?
  9. How do you think other members of your community feel about vaccination?
    - What concerns or fears do other members of your community may have about vaccination?

- 1  
2  
3  
4 10. Do you know anyone in the Somali community in San Diego who has chosen not to vaccinate?  
5 Why? Do you think they would be willing to speak with us?  
6  
7  
8 11. Do you feel like you've been provided enough information about vaccinations to make an  
9 informed decision?
- 10 • Do you feel like members of your community are provided with enough information  
11 about vaccination to make an informed decision?  
12
- 13 12. If you've changed your mind about vaccinations at any point, do you recall what that deciding  
14 factor was? If you haven't changed your mind (or if you are still anti-vaccination or hesitant),  
15 what may change your mind?  
16  
17
- 18 13. What would you like to know or understand about vaccinations?
- 19 • What do you think members of your community would like to know or understand  
20 about vaccinations?  
21
- 22 14. What do you know about Virtual Reality? Have you ever used it?
- 23 • Would you feel comfortable using VR for an education program? Do you think  
24 members of your community would be comfortable using VR?  
25
  - 26 • Do you have any questions about Virtual Reality?  
27
- 28  
29 15. What other formats would be best for developing a health education program for your  
30 community? (video, game, lecture, workshop, discussion)?  
31  
32
- 33 16. Is there anything else you think we should know or consider?  
34  
35 0. Any questions for me?  
36  
37  
38  
39  
40  
41  
42  
43  
44  
45  
46  
47  
48  
49  
50  
51  
52  
53  
54  
55  
56  
57  
58  
59  
60

## Standards for Reporting Qualitative Research (SRQR)\*

<http://www.equator-network.org/reporting-guidelines/srqr/>

Page/line no(s).

### Title and abstract

|                                                                                                                                                                                                                                                              |        |
|--------------------------------------------------------------------------------------------------------------------------------------------------------------------------------------------------------------------------------------------------------------|--------|
| <p><b>Title</b> - Concise description of the nature and topic of the study Identifying the study as qualitative or indicating the approach (e.g., ethnography, grounded theory) or data collection methods (e.g., interview, focus group) is recommended</p> | Page 1 |
| <p><b>Abstract</b> - Summary of key elements of the study using the abstract format of the intended publication; typically includes background, purpose, methods, results, and conclusions</p>                                                               | Page 3 |

### Introduction

|                                                                                                                                                                     |                 |
|---------------------------------------------------------------------------------------------------------------------------------------------------------------------|-----------------|
| <p><b>Problem formulation</b> - Description and significance of the problem/phenomenon studied; review of relevant theory and empirical work; problem statement</p> | Page 6          |
| <p><b>Purpose or research question</b> - Purpose of the study and specific objectives or questions</p>                                                              | Page 7 Line 102 |

### Methods

|                                                                                                                                                                                                                                                                                                                                                                                                             |                                                                                                                                                                                                                                                                                                                                                                    |
|-------------------------------------------------------------------------------------------------------------------------------------------------------------------------------------------------------------------------------------------------------------------------------------------------------------------------------------------------------------------------------------------------------------|--------------------------------------------------------------------------------------------------------------------------------------------------------------------------------------------------------------------------------------------------------------------------------------------------------------------------------------------------------------------|
| <p><b>Qualitative approach and research paradigm</b> - Qualitative approach (e.g., ethnography, grounded theory, case study, phenomenology, narrative research) and guiding theory if appropriate; identifying the research paradigm (e.g., postpositivist, constructivist/interpretivist) is also recommended; rationale**</p>                                                                             | <p>Page 8 line 120</p> <p>Page 9 line 160</p> <p>We employed CBPR and community co-design in order to develop educational content that was created by and for the communities for whom it was intended. We used focus groups, interviews, and surveys in order to triangulate our data and to include the voices of the community in as many ways as possible.</p> |
| <p><b>Researcher characteristics and reflexivity</b> - Researchers' characteristics that may influence the research, including personal attributes, qualifications/experience, relationship with participants, assumptions, and/or presuppositions; potential or actual interaction between researchers' characteristics and the research questions, approach, methods, results, and/or transferability</p> | Page 8 Line 121                                                                                                                                                                                                                                                                                                                                                    |
| <p><b>Context</b> - Setting/site and salient contextual</p>                                                                                                                                                                                                                                                                                                                                                 | Page 8 Line 135                                                                                                                                                                                                                                                                                                                                                    |

|                                                                                                                                                                                                                                                                                                                                                                                                   |                                                                                                                                                                                                                                                                                                                                                                                                                                                                                                                                                                                                                                                                                                                                   |
|---------------------------------------------------------------------------------------------------------------------------------------------------------------------------------------------------------------------------------------------------------------------------------------------------------------------------------------------------------------------------------------------------|-----------------------------------------------------------------------------------------------------------------------------------------------------------------------------------------------------------------------------------------------------------------------------------------------------------------------------------------------------------------------------------------------------------------------------------------------------------------------------------------------------------------------------------------------------------------------------------------------------------------------------------------------------------------------------------------------------------------------------------|
| factors; rationale**                                                                                                                                                                                                                                                                                                                                                                              |                                                                                                                                                                                                                                                                                                                                                                                                                                                                                                                                                                                                                                                                                                                                   |
| <p>1<br/>2<br/>3<br/>4<br/>5<br/>6<br/>7<br/>8<br/>9<br/>10<br/>11<br/>12<br/>13<br/>14<br/>15<br/>16<br/>17<br/>18<br/>19<br/>20</p> <p><b>Sampling strategy</b> - How and why research participants, documents, or events were selected; criteria for deciding when no further sampling was necessary (e.g., sampling saturation); rationale**</p>                                              | <p>Page 8 line 125.</p> <p>Somali community members were chosen in the manner that they were because we recognize the importance of including the entire community in research. There is a strong oral tradition in Somali culture and parents often ask advice from extended family and community when making decisions about healthcare. Thus, we found it necessary to engage individuals of all ages and genders who spoke English and Somali to guide the educational material and provide their input.</p> <p>Expert advisors were chosen in order to provide us with another view of the issue from a technical angle so that we could better create something that could be realistically delivered to the community.</p> |
| <p>21<br/>22<br/>23<br/>24<br/>25<br/>26<br/>27</p> <p><b>Ethical issues pertaining to human subjects</b> - Documentation of approval by an appropriate ethics review board and participant consent, or explanation for lack thereof; other confidentiality and data security issues</p>                                                                                                          | <p>Page 9 Line 150</p>                                                                                                                                                                                                                                                                                                                                                                                                                                                                                                                                                                                                                                                                                                            |
| <p>28<br/>29<br/>30<br/>31<br/>32<br/>33<br/>34<br/>35<br/>36</p> <p><b>Data collection methods</b> - Types of data collected; details of data collection procedures including (as appropriate) start and stop dates of data collection and analysis, iterative process, triangulation of sources/methods, and modification of procedures in response to evolving study findings; rationale**</p> | <p>Page 10 Line 180</p> <p>We collected data via focus groups, interviews, and surveys in order to triangulate data. We also wanted to reach as many community members as possible so we engaged people online, at the offices of the nonprofit organization, and at community health fairs.</p>                                                                                                                                                                                                                                                                                                                                                                                                                                  |

|                                              |                                                                                                                                                                                                                                                       |                                                                                                                                                          |
|----------------------------------------------|-------------------------------------------------------------------------------------------------------------------------------------------------------------------------------------------------------------------------------------------------------|----------------------------------------------------------------------------------------------------------------------------------------------------------|
| 1<br>2<br>3<br>4<br>5<br>6<br>7<br>8<br>9    | <b>Data collection instruments and technologies</b> - Description of instruments (e.g., interview guides, questionnaires) and devices (e.g., audio recorders) used for data collection; if/how the instrument(s) changed over the course of the study | Interview and focus group discussion guides were included as supplementary files. Types of questions asked are also described throughout the manuscript. |
| 10<br>11<br>12<br>13<br>14<br>15<br>16<br>17 | <b>Units of study</b> - Number and relevant characteristics of participants, documents, or events included in the study; level of participation (could be reported in results)                                                                        | Number of participants is described throughout the paper at each relevant event (n of focus group participants etc.)                                     |
| 18<br>19<br>20<br>21                         | <b>Data processing</b> - Methods for processing data prior to and during analysis, including transcription, data entry, data management and security, verification of data integrity, data coding, and anonymization/de-identification of excerpts    | Line 206                                                                                                                                                 |
| 22<br>23<br>24<br>25                         | <b>Data analysis</b> - Process by which inferences, themes, etc., were identified and developed, including the researchers involved in data analysis; usually references a specific paradigm or approach; rationale**                                 | Line 213                                                                                                                                                 |
| 26<br>27<br>28<br>29                         | <b>Techniques to enhance trustworthiness</b> - Techniques to enhance trustworthiness and credibility of data analysis (e.g., member checking, audit trail, triangulation); rationale**                                                                | Line 221                                                                                                                                                 |

### Results/findings

|                                        |                                                                                                                                                                                                   |                                                                                                   |
|----------------------------------------|---------------------------------------------------------------------------------------------------------------------------------------------------------------------------------------------------|---------------------------------------------------------------------------------------------------|
| 31<br>32<br>33<br>34<br>35             | <b>Synthesis and interpretation</b> - Main findings (e.g., interpretations, inferences, and themes); might include development of a theory or model, or integration with prior research or theory | Described beginning on line 226.                                                                  |
| 36<br>37<br>38<br>39<br>40<br>41<br>42 | <b>Links to empirical data</b> - Evidence (e.g., quotes, field notes, text excerpts, photographs) to substantiate analytic findings                                                               | Quotes included in tables; figures included to show experience created and assessed by community. |

### Discussion

|                                              |                                                                                                                                                                                                                                                                                                                                                                                                             |          |
|----------------------------------------------|-------------------------------------------------------------------------------------------------------------------------------------------------------------------------------------------------------------------------------------------------------------------------------------------------------------------------------------------------------------------------------------------------------------|----------|
| 44<br>45<br>46<br>47<br>48<br>49<br>50<br>51 | <b>Integration with prior work, implications, transferability, and contribution(s) to the field</b> - Short summary of main findings; explanation of how findings and conclusions connect to, support, elaborate on, or challenge conclusions of earlier scholarship; discussion of scope of application/generalizability; identification of unique contribution(s) to scholarship in a discipline or field | Line 366 |
| 52<br>53                                     | <b>Limitations</b> - Trustworthiness and limitations of findings                                                                                                                                                                                                                                                                                                                                            | Line 442 |

### Other

|                                        |                                                                                                                                               |          |
|----------------------------------------|-----------------------------------------------------------------------------------------------------------------------------------------------|----------|
| 54<br>55<br>56<br>57<br>58<br>59<br>60 | <b>Conflicts of interest</b> - Potential sources of influence or perceived influence on study conduct and conclusions; how these were managed | Line 487 |
|----------------------------------------|-----------------------------------------------------------------------------------------------------------------------------------------------|----------|

1  
2  
3  
4  
5  
6  
7  
8  
9  
10  
11  
12  
13  
14  
15  
16  
17  
18  
19  
20  
21  
22  
23  
24  
25  
26  
27  
28  
29  
30  
31  
32  
33  
34  
35  
36  
37  
38  
39  
40  
41  
42  
43  
44  
45  
46  
47  
48  
49  
50  
51  
52  
53  
54  
55  
56  
57  
58  
59  
60

|                                                                                                                          |          |
|--------------------------------------------------------------------------------------------------------------------------|----------|
| <b>Funding</b> - Sources of funding and other support; role of funders in data collection, interpretation, and reporting | Line 506 |
|--------------------------------------------------------------------------------------------------------------------------|----------|

\*The authors created the SRQR by searching the literature to identify guidelines, reporting standards, and critical appraisal criteria for qualitative research; reviewing the reference lists of retrieved sources; and contacting experts to gain feedback. The SRQR aims to improve the transparency of all aspects of qualitative research by providing clear standards for reporting qualitative research.

For peer review only



1  
2  
3  
4  
5  
6  
7  
8  
9  
10  
11  
12  
13  
14  
15  
16  
17  
18  
19  
20  
21  
22  
23  
24  
25  
26  
27  
28  
29  
30  
31  
32  
33  
34  
35  
36  
37  
38  
39  
40  
41  
42  
43  
44  
45  
46  
47  
48  
49  
50  
51  
52  
53  
54  
55  
56  
57  
58  
59  
60

\*\*The rationale should briefly discuss the justification for choosing that theory, approach, method, or technique rather than other options available, the assumptions and limitations implicit in those choices, and how those choices influence study conclusions and transferability. As appropriate, the rationale for several items might be discussed together.

**Reference:**

O'Brien BC, Harris IB, Beckman TJ, Reed DA, Cook DA. **Standards for reporting qualitative research: a synthesis of recommendations.** *Academic Medicine*, Vol. 89, No. 9 / Sept 2014  
DOI: [10.1097/ACM.0000000000000388](https://doi.org/10.1097/ACM.0000000000000388)

For peer review only

# BMJ Open

## Development of a Cultural and Linguistically Sensitive Virtual Reality Educational Platform to Improve Vaccine Acceptance within a Refugee Population: The SHIFA Community Engagement-Public Health Innovation Program

|                                 |                                                                                                                                                                                                                                                                                                                                                                                                                                                                                                                                                                                                                                                                                                                                                                                                                                                                                                                                                                  |
|---------------------------------|------------------------------------------------------------------------------------------------------------------------------------------------------------------------------------------------------------------------------------------------------------------------------------------------------------------------------------------------------------------------------------------------------------------------------------------------------------------------------------------------------------------------------------------------------------------------------------------------------------------------------------------------------------------------------------------------------------------------------------------------------------------------------------------------------------------------------------------------------------------------------------------------------------------------------------------------------------------|
| Journal:                        | <i>BMJ Open</i>                                                                                                                                                                                                                                                                                                                                                                                                                                                                                                                                                                                                                                                                                                                                                                                                                                                                                                                                                  |
| Manuscript ID                   | bmjopen-2021-051184.R2                                                                                                                                                                                                                                                                                                                                                                                                                                                                                                                                                                                                                                                                                                                                                                                                                                                                                                                                           |
| Article Type:                   | Original research                                                                                                                                                                                                                                                                                                                                                                                                                                                                                                                                                                                                                                                                                                                                                                                                                                                                                                                                                |
| Date Submitted by the Author:   | 29-Aug-2021                                                                                                                                                                                                                                                                                                                                                                                                                                                                                                                                                                                                                                                                                                                                                                                                                                                                                                                                                      |
| Complete List of Authors:       | Streuli, Samantha; University of California San Diego, Anthropology<br>Ibrahim, Najla; Somali Family Service of San Diego<br>Mohamed, Alia; San Diego State University<br>Sharma, Manupriya; Palomar College<br>Esmailian, Markie; Illumesense Inc.<br>Sezan, Ibrahim; Distinct Insights LLC<br>Farrell, Carrie; San Diego State University<br>Sawyer, Mark; University of California San Diego School of Medicine<br>Meyer, Dan; The University of Texas Southwestern Medical Center<br>El-Maleh, Khaled; QUALCOMM Inc<br>Thamman, Ritu; University of Pittsburgh Department of Medicine<br>Marchetti, Alex; Miami University<br>Lincoln, Alan; Alliant International University - San Diego<br>Courchesne, Eric; University of California San Diego School of Medicine<br>Sahid, Ahmed; Somali Family Service of San Diego<br>Bhavnani, Sanjeev; Scripps Clinic La Jolla - Genesee Executive Plaza, Healthcare Innovation & Practice Transformation Laboratory |
| <b>Primary Subject Heading</b>: | Qualitative research                                                                                                                                                                                                                                                                                                                                                                                                                                                                                                                                                                                                                                                                                                                                                                                                                                                                                                                                             |
| Secondary Subject Heading:      | Public health                                                                                                                                                                                                                                                                                                                                                                                                                                                                                                                                                                                                                                                                                                                                                                                                                                                                                                                                                    |
| Keywords:                       | Paediatric infectious disease & immunisation < PAEDIATRICS, QUALITATIVE RESEARCH, Community child health < PAEDIATRICS                                                                                                                                                                                                                                                                                                                                                                                                                                                                                                                                                                                                                                                                                                                                                                                                                                           |
|                                 |                                                                                                                                                                                                                                                                                                                                                                                                                                                                                                                                                                                                                                                                                                                                                                                                                                                                                                                                                                  |

SCHOLARONE™  
Manuscripts

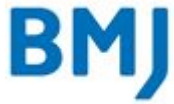

I, the Submitting Author has the right to grant and does grant on behalf of all authors of the Work (as defined in the below author licence), an exclusive licence and/or a non-exclusive licence for contributions from authors who are: i) UK Crown employees; ii) where BMJ has agreed a CC-BY licence shall apply, and/or iii) in accordance with the terms applicable for US Federal Government officers or employees acting as part of their official duties; on a worldwide, perpetual, irrevocable, royalty-free basis to BMJ Publishing Group Ltd ("BMJ") its licensees and where the relevant Journal is co-owned by BMJ to the co-owners of the Journal, to publish the Work in this journal and any other BMJ products and to exploit all rights, as set out in our [licence](#).

The Submitting Author accepts and understands that any supply made under these terms is made by BMJ to the Submitting Author unless you are acting as an employee on behalf of your employer or a postgraduate student of an affiliated institution which is paying any applicable article publishing charge ("APC") for Open Access articles. Where the Submitting Author wishes to make the Work available on an Open Access basis (and intends to pay the relevant APC), the terms of reuse of such Open Access shall be governed by a Creative Commons licence – details of these licences and which [Creative Commons](#) licence will apply to this Work are set out in our licence referred to above.

Other than as permitted in any relevant BMJ Author's Self Archiving Policies, I confirm this Work has not been accepted for publication elsewhere, is not being considered for publication elsewhere and does not duplicate material already published. I confirm all authors consent to publication of this Work and authorise the granting of this licence.

1  
2  
3 **Development of a Cultural and Linguistically Sensitive Virtual Reality Educational Platform to Improve**  
4 **Vaccine Acceptance within a Refugee Population: The SHIFA Community Engagement-Public Health**  
5 **Innovation Program**  
6  
7  
8

9  
10 **Author Block:** Samantha A. Streuli PhD<sup>1</sup>, Najla Ibrahim MPH<sup>2</sup>, Alia Mohamed<sup>3</sup>, Manupriya Sharma PhD<sup>4</sup>,  
11  
12 5 Markie Esmailian<sup>5</sup>, Ibrahim Sezan PhD<sup>6</sup>, Carrie Farrell MPA<sup>7</sup>, Mark Sawyer MD<sup>8</sup>, Dan Meyer MD<sup>9</sup>, Khaled  
13  
14 El-Maleh<sup>10</sup>, Ritu Thamman MD<sup>11</sup>, Alex Marchetti<sup>12</sup>, Alan Lincoln PhD<sup>13</sup>, Eric Courchesne<sup>14</sup>, Ahmed Sahid<sup>2</sup>,  
15  
16 Sanjeev P. Bhavnani MD<sup>15</sup>  
17  
18

19  
20 **Affiliations:** 1) Department of Anthropology, University of California San Diego 2) Somali Family Service  
21  
22 of San Diego 3) San Diego State University 4) Palomar College 5) Illumesense Inc. 6) Distinct Insights, LLC  
23  
24 10 7) San Diego State University 8) UC San Diego School of Medicine 9) University of Texas Southwestern  
25  
26 Medical Center 10) Qualcomm Inc. 11) Department of Medicine University of Pittsburgh 12) Miami  
27  
28 University 13) Alliant International University 14) UC San Diego School of Medicine 15) Scripps Clinic,  
29  
30 Healthcare Innovation & Practice Transformation Laboratory  
31  
32  
33

34 **Author for Correspondence:** Samantha Streuli  
35  
36

37 15 **Affiliation:** Department of Anthropology, University of California, San Diego  
38  
39

40 **Address:** 9500 Gilman Dr. #0532 La Jolla, CA 92093  
41  
42

43 **Phone:** (858) 952-6238  
44  
45

46 **Email:** sstreuli@ucsd.edu  
47  
48

49 **Keywords:** vaccination, refugee health, community engagement, virtual reality, education  
50  
51

52 20 **Manuscript Word Count:** 4821  
53  
54

55 **Figures and Tables:** 6  
56  
57  
58  
59  
60

1  
2  
3  
4  
5  
6  
7  
8  
9  
10  
11  
12  
13  
14  
15  
16  
17  
18  
19  
20  
21  
22  
23  
24  
25  
26  
27  
28  
29  
30  
31  
32  
33  
34  
35  
36  
37  
38  
39  
40  
41  
42  
43  
44  
45  
46  
47  
48  
49  
50  
51  
52  
53  
54  
55  
56  
57  
58  
59  
60

**Number of References: 23**

For peer review only

1  
2  
3 25 **ABSTRACT**  
4  
5

6 **Objectives:** To combat misinformation, engender trust, and increase health literacy, we developed a  
7 culturally and linguistically appropriate virtual reality (VR) vaccination education platform using  
8 community-engaged approaches within a Somali refugee community.  
9  
10

11 **Design:** Community based participatory research (CBPR) methods including focus group discussions,  
12  
13 30 interviews, and surveys were conducted with Somali community members and expert advisors to design  
14 the educational content. Co-design approaches with community input were employed in a phased  
15 approach to develop the VR storyline.  
16  
17

18 **Participants:** 60 adult Somali refugees and 7 expert advisors who specialize in healthcare, autism  
19 research, technology development, and community engagement.  
20  
21

22 **Setting:** Somali refugees participated at the offices of a community-based organization, Somali Family  
23 Service, in San Diego, California and online. Expert advisors responded to surveys virtually.  
24  
25

26 **Results:** We find that a CBPR approach can be effectively used for the co-design of a VR educational  
27 program. Additionally, cultural and linguistic sensitivities can be incorporated within a VR educational  
28 program and are essential factors for effective community engagement. Finally, effective VR utilization  
29 requires flexibility so that it can be used among community members with varying levels of health and  
30 technology literacy.  
31  
32  
33  
34  
35  
36  
37 40  
38  
39  
40

41 **Conclusion:** We describe using community co-design to create a culturally and linguistically sensitive VR  
42 experience promoting vaccination within a refugee community. Our approach to VR development  
43 incorporated community members at each step of the process. Our methodology is potentially  
44 applicable to other populations where cultural sensitivities and language are common health education  
45 barriers.  
46  
47  
48  
49  
50  
51  
52  
53  
54  
55  
56  
57  
58  
59  
60

1  
2  
3  
4  
5  
6  
7  
8  
9  
10  
11  
12  
13  
14  
15  
16  
17  
18  
19  
20  
21  
22  
23  
24  
25  
26  
27  
28  
29  
30  
31  
32  
33  
34  
35  
36  
37  
38  
39  
40  
41  
42  
43  
44  
45  
46  
47  
48  
49  
50  
51  
52  
53  
54  
55  
56  
57  
58  
59  
60

**List of Abbreviations:**

CBPR: Community based participatory research

50 CHW: Community health worker

MMR: Measles, mumps, and rubella vaccination

SFS: Somali Family Service

VR: Virtual reality

For peer review only

1  
2  
3 55 **ARTICLE SUMMARY**  
4

5 **Strengths and Limitations of this Study**  
6

- 7
- 8 ● We use a community co-design process that is supported by previous research to design a  
9 virtual reality education experience for an underserved community.  
10
  - 11 ● The qualitative aspects of this study provide in-depth information that can help to address  
12 complex vaccine hesitancy issues among Somali refugees.  
13 60
  - 14 ● We employed an iterative, phased approach to the development of educational content which  
15 allowed us to continuously assess the project and how it impacted the refugee community.  
16
  - 17 ● This project is a pilot study with a small sample size which will need to be expanded to truly  
18 understand the effect of our virtual reality health innovation on refugee vaccine perceptions and  
19 behaviors.  
20 65
- 21  
22  
23  
24  
25  
26  
27  
28  
29  
30  
31  
32  
33  
34  
35  
36  
37  
38  
39  
40  
41  
42  
43  
44  
45  
46  
47  
48  
49  
50  
51  
52  
53  
54  
55  
56  
57  
58  
59  
60



## INTRODUCTION

Over 300,000 refugees enter the United States every year. While refugee resettlement has increased over time, events as recent as 2015 mark one of the largest exoduses of forced human migration, sparking a crisis as countries struggle to cope with the influx and the social and economic demands that coincide with human resettlement [1]. What is largely missing in the public discussion is an appreciation that refugees face extraordinary challenges throughout their migration process from origination to destination. One challenge in particular – the access to proper healthcare - is critical, both for those that have been resettled in the past and those who have recently arrived [2]. The other challenge is to collect and monitor healthcare data that can be accessed and disseminated to resettled communities for public health monitoring [3]. In recognition of these challenges, important questions range from how to efficiently meet the healthcare demands of a growing population that is effective and sustainable to providing an engagement that uses culturally specific resources that simultaneously enhances health education and drives an increased level of trust in the local healthcare system [4].

Upon resettlement in Western countries, many Somali refugees were faced with the widespread diagnosis of autism, a developmental disorder which was unfamiliar to them prior to migration [5]. On one hand, among a community cluster of resettled Somali children in Minneapolis, the prevalence of autism has exceeded 3% and has eclipsed the national average of 1.9% [6]. On the other hand, this specific refugee community was targeted by anti-vaccination activists and the propaganda that vaccination is a cause of autism. This misinformation led to concern by Somali parents and distrust in the healthcare system, which has resulted in a propensity for vaccine hesitancy and non-acceptance [5,6,7]. A lack of effective messaging towards what does cause autism and the dissemination of anti-vaccination propaganda were successful in decreasing vaccination rates in the Somali refugee population in Minnesota from 92% to 42% over the span of a decade [7,8].

1  
2  
3 Effective healthcare education relies on various principles for building essential skills, including  
4 communication, assessing the accuracy of information, decision making, planning, goal setting, and self-  
5 management [9]. At its core, health education must be simple, retained, and must be assimilated within  
6 those factors relevant to a given individuals biases and acceptances towards the delivered message [9].  
7  
8  
9

10  
11  
12 95 New digital innovations such as virtual reality (VR) have emerged as tools to provide enriching and  
13 immersive learning experiences that promote understanding in acute conditions such as anxiety and post-  
14 traumatic stress disorder, and chronic conditions such as tobacco cessation [10-12]. VR has also been used  
15 to provide patients with a more positive experience in hospital settings by using virtual nurses that  
16 patients can relate to [13]. The ability for VR to increase information retention and to change health  
17 behaviors by engaging users in a non-healthcare environment makes VR a potentially valuable platform  
18 for visual health education. Therefore, our primary aim was to develop a customized, culturally and  
19 linguistically appropriate VR educational program specifically focused on pediatric vaccinations, and to  
20 leverage community-based participatory research models and community co-designs to build, test, and  
21 deploy VR at the community level among a group that are known to be vaccine hesitant or vaccine  
22 resistant.  
23  
24  
25  
26  
27  
28  
29  
30  
31  
32  
33  
34 105  
35  
36  
37  
38

### 39 **METHODS: STUDY DESIGN**

40  
41 SHIFA (Arabic for 'healing') is a community innovation program to design, deploy, and utilize new  
42 healthcare innovations with an inclusive model of community engagement. Within the current program,  
43 community-based participation was incorporated along three complementary approaches [14]. These  
44  
45 110  
46  
47 include:  
48  
49

- 50  
51 1) To define the health care access barriers in a resettled refugee community with a focus on  
52 pediatric vaccination.  
53
- 54  
55 2) Incorporate a community-based participatory model to develop the virtual reality content  
56  
57

1  
2  
3 115 with community member co-design.  
4

- 5 3) Develop a virtual reality environment that is customized with cultural, linguistic, and religious  
6  
7 sensitivities to provide appropriate health education.  
8

9  
10 Qualitative feedback was derived through focus group discussions, interviews, and surveys  
11 developed by the investigators and was completed by community members and experts for analysis  
12  
13  
14 120 during each phase of technology development. Focus groups and interviews were conducted by Najla  
15  
16 Ibrahim and Samantha Streuli. Najla Ibrahim is a Somali woman who holds an MPH degree and is an expert  
17  
18 in community public health issues. Samantha Streuli is a white woman who holds a PhD in anthropology  
19  
20 and who has been working with the Somali community for four years. The majority of focus group and  
21  
22 interview participants were unknown to Samantha and Najla prior to the research project, though some  
23  
24  
25 125 were acquaintances from previous work within the Somali community.  
26  
27  
28  
29

### 30 ***Ethics Approval Statement***

31  
32 This study was approved by The University of California San Diego Institutional Review Board  
33  
34 (Protocol #171434).  
35

36  
37 130

### 38 39 ***Patient and Public Involvement***

40  
41 The Somali community was involved in the research from its inception and were regularly  
42  
43 consulted as the research was developed. Focus groups and interviews with the community informed the  
44  
45 development of research questions, which prioritized the experiences and interests of the Somali  
46  
47 community. We consulted with community members and community leaders when designing and  
48 135  
49 conducting the study and developing survey, focus group discussion, and interview questions to  
50  
51 determine outcome measures. Somali community members were also involved in the recruitment to the  
52  
53 study, as much of the recruitment happened via word-of-mouth. The results of the study will be presented  
54  
55  
56  
57  
58  
59  
60

1  
2  
3 to participants and other community members, who will be further consulted via focus groups on how to  
4  
5 140 best disseminate results.  
6  
7  
8  
9

## 10 **Participants**

### 11 *Inclusion/Exclusion Criteria*

12  
13 We identified groups of Somali individuals for community participation and VR co-design.  
14  
15 145 Participants were required to be members of the Somali community in San Diego, California who were  
16  
17 over the age of 18 and were either 1) Somali refugees; 2) Somali immigrants; or, 3) US-born Somali  
18  
19 Americans. We selected a group of 7 expert advisors to assist in the development of VR. These advisors  
20  
21 included: 1) researchers or other experts in autism and/or vaccination; 2) physicians serving the San Diego  
22  
23 Somali community and in pediatric health; 3) leaders within the Somali community.  
24  
25  
26  
27

28 150

### 29 **Setting**

30  
31 San Diego County is the 3<sup>rd</sup> largest metropolitan area in California and the 12<sup>th</sup> largest  
32  
33 resettlement area in the United States. The organization responsible for the development and execution  
34  
35 of the program is Somali Family Service (SFS), a fiscal sponsor for the East African Collaborative of 8-  
36  
37 155 community organizations that aims to outreach, educate, and enroll refugees and immigrants in health  
38  
39 insurance programs. This specific community predominantly resides in City Heights, a subdivision of San  
40  
41 Diego County that has a population of 75,000 individuals. Socioeconomic statistics of this region includes  
42  
43 a median household income of \$39,330 (national median \$55,322), 40% are immigrants and/or refugees,  
44  
45 with 31% having an education level of a bachelor's degree or greater [15].  
46  
47  
48  
49

50  
51 160  
52  
53  
54  
55  
56  
57  
58  
59  
60

### **Recruitment**

1  
2  
3  
4  
5  
6 Somali individuals were recruited via telephone and through word-of-mouth by Somali  
7  
8 Community Health Workers (CHWs) and peers. As a non-interventional and non-comparative program,  
9  
10 we did not determine an a priori sample size and identified consecutive participants interested in  
11 165 participating within the community engagement design. As such, we included any individuals without a  
12  
13 predefined minimum or maximum sample size. In total, we included 60 community participants and 7  
14  
15 expert advisors. Our target participants were: a) parents of children between 0-2 years of age, b) pregnant,  
16  
17 or c) planning to become pregnant in the next two years; however, we included those Somali community  
18  
19  
20  
21 170 members interested in issues of autism and/or vaccination regardless of parental status. All participants  
22  
23 consented to have their names and contact information collected for future correspondences. This  
24  
25 information was securely stored in an encrypted file and only used to re-contact participants who agree  
26  
27 to be re-contacted. The research objectives, research participants' rights, and description of how data  
28  
29 would be used were explained to all participants prior to participation. All participants provided verbal  
30  
31  
32 175 consent, which was approved by The University of California San Diego Institutional Review Board  
33  
34 (#171434).  
35  
36  
37  
38  
39

40 Expert advisors were identified by the SHIFA project leadership team according to their particular  
41  
42 areas of specialization. Advisors signed consent forms to participate in the iterative development of  
43  
44 180 educational content.  
45  
46  
47  
48

### **CBPR and Community Co-Design**

49  
50  
51 Our Community-Based Participatory Research (CBPR) approach involved community members in  
52  
53 each step of the design, iterative testing, and development of culturally and linguistically appropriate  
54  
55  
56 185 health education content. This approach to CBPR in the Somali community builds upon public health work  
57  
58  
59  
60

1  
2  
3 previously done within refugee communities [16]. We developed a community co-design methodology  
4 that uses the principles of design thinking combined with community-based research to enable  
5 participants to be directly involved in the design and creation of content and products that are developed  
6 to benefit them [16-17]. This co-design methodology was inclusive in that community members were  
7  
8  
9  
10  
11  
12 190 asked to participate within content curation and to lead certain aspects of VR development.  
13  
14  
15

### 16 ***Phased Approach to Virtual Reality Development*** 17

18  
19 We merged each aspect of CBPR and community co-designs within a phased approach to VR  
20 development (Vendor: INVIVO, Toronto, Canada). These phases included:  
21  
22

23  
24 195 **Phase 1:** CBPR approaches to assess community needs and concerns important to pediatric vaccination.  
25  
26

27 **Phase 2:** VR modality determination for script development. The modality consisted of the type of VR  
28 experience and the script development included the specific educational content.  
29  
30

31  
32 **Phase 3:** VR Prototype and iterative feedback from storyboards, 2- and 3-dimensional animation, and  
33 visual and audio experiences that incorporate VR design elements including those factors that allow users  
34  
35  
36  
37 200 to engage at different levels of health literacy.  
38  
39

40 **Phase 4:** Final VR Product and Testing  
41  
42

43 The objective within VR development was to use those tools and devices that were available to the  
44 community-at-large and to ensure cultural and linguistic sensitivities were incorporated.  
45  
46  
47  
48  
49  
50

51 205  
52  
53  
54  
55  
56  
57  
58  
59  
60

### ***Data Collection and Analysis***

1  
2  
3  
4  
5  
6 All data were collected electronically via tablet or computer at the time of focus group discussions,  
7  
8 interviews, and surveys. Focus group discussions and interviews were either recorded and transcribed, or  
9  
10 210 extensive notes were taken on a computer in the event that groups or individuals declined to be recorded.  
11  
12 Focus group discussions took place at the offices of SFS. In total, we conducted 5 focus groups with 57  
13  
14 participants. Some participants attended more than one focus group. Four of the focus groups were  
15  
16 structured (see supplementary materials for discussion guides), while one was an unstructured discussion  
17  
18 of the prototype. Interviews also took place at the offices of SFS and were conducted with 3 Somali  
19  
20  
21 215 parents. While the majority of participants were female, we also had a small number of male participants.  
22  
23

24  
25 Analyses were conducted thematically and iteratively using the content of the surveys, focus  
26  
27 group discussions, and interviews during the phased approach for VR development. This approach utilized  
28  
29 five steps: 1) familiarization, 2) coding, 3) theme development, 4) defining themes and, 5) reporting [18].  
30  
31 During the process of familiarization, all sections of the interviews, focus group discussions, and surveys  
32  
33 220 relating to the experience of utilizing VR were extracted. Coding was performed using MAXQDA software.  
34  
35 Emergent themes from each phase of development were defined and reported in order to inform the  
36  
37 subsequent development phases.  
38  
39

40  
41 The primary data coder was SAS. To ensure a rigorous evaluation of the data, a subset of  
42  
43 transcripts was also coded by AM. In order to achieve consensus on codes, AM and SAS engaged in  
44  
45 225 recurring discussions on the coding process. The analysis was further tested during discussions with expert  
46  
47 advisors. The consensus was reviewed and approved by all investigators. Specific quotations were chosen  
48  
49 by SAS to represent emergent themes in the data.  
50  
51

52  
53  
54  
55  
56 230  
57  
58  
59  
60

## RESULTS

This program began in April 2019 and product testing is ongoing. Figure 1 illustrates the phased approach to development and iterative testing. In total, 67 individuals (7 advisors, 60 Somali community members) provided feedback during each phase of VR development and participated within the community-co design.

### *Community-based Participation*

The first step in our community engagement process was to hold a series of 3 focus groups exploring topics of interest to the Somali community including vaccination, autism, pediatric health, and technology (n = 18 Somali community members). We also conducted interviews with 3 Somali parents (see supplementary files for interview guide). Based on this initial feedback from the community, the project team held a design workshop to create a series of 3 story ideas for the VR. These ideas were then brought to the Somali community in the form of another design workshop where the community evaluated the suitability of the provided stories and suggested changes. 4 Somali community members (2 Somali community health workers, 1 Somali woman, and 1 Somali man) participated in this design workshop to develop the general framework of a story. Information learned from the community was then used to develop a first iteration of a script. This script was then tested for cultural and linguistic suitability and vaccine-promotion potential with 17 Somali women from ages 26-78 and was followed by a discussion with a prominent male community leader to again assess the cultural and linguistic appropriateness of the content to promote vaccine education. Finally, a 2-dimensional prototype of the VR animation was developed with a Somali voiceover (Figure 2) and was tested with 24 community members in order to determine the effectiveness of the messaging in promoting vaccination and to assess cultural and linguistic elements of the storyline.



1  
2  
3  
4  
5 255 ***Phased Approach to Virtual Reality Technology Development***  
6  
7

8 ***Phase 1:*** CBPR approaches to assess community needs and concerns important to pediatric vaccination  
9

10  
11 The Somali community focus group discussions were broken up into three separate sessions,  
12 each of which focused on a particular area of community interest (Table 1). The first focus group  
13 discussion was centered on health concerns of the community, and participants cited autism as a major  
14 concern, as well as language barriers that pose a significant problem when engaging with the medical  
15 system. In addition, participants brought up issues of trust which were tied to poor communication.  
16  
17 260

18  
19  
20  
21  
22 The second focus group discussion explored issues of pediatric health. Participants provided  
23 information about pregnancy, childbirth, pediatric care, and parenting. The central theme of this focus  
24 group discussion was issues of trust within the medical system, with many mothers indicating that while  
25 they highly valued their doctors' opinions, they also preferred to do their own research. Mothers  
26  
27 265  
28  
29  
30  
31 relayed to us their desire to receive health education in their own language from a trustworthy doctor.  
32  
33

34 The third focus group discussion was centered around issues of vaccination and technology.  
35 Participants once again indicated issues surrounding trust in medical systems and their desire to make  
36 their own educated health decisions. Additionally, participants stated that they would like to receive  
37  
38  
39  
40 270 more detailed information about how vaccinations work:  
41  
42  
43  
44

45 "If they could show how the vaccine works in the child's body and what it does – if it can be  
46 visualized."  
47  
48  
49  
50

51 275 "That before the vaccines are given to our children, for it to be explained to us what the risks are  
52 - the sided effects, and the benefits. When we compare the two, then make a decision."  
53  
54  
55  
56  
57  
58  
59  
60

1  
2  
3 Themes that emerged from interviews with 3 Somali parents also included concerns about autism,  
4  
5 medical trust, and the desire to learn more about vaccination.  
6

7  
8 280

9  
10 **Phase 2: VR modality determination for script development**  
11

12  
13 *Modality determination:* The project team consulted extensively with Somali CHWs to determine  
14  
15 an appropriate modality, and chose 360-degree video due to the ability of this format to be experienced  
16  
17 using virtual reality headsets, smart phones, or computers in order to make this VR program widely  
18  
19 accessible to all members of the Somali community.  
20 285

21  
22  
23 *Script development:* Open-ended survey responses from Somali community members regarding  
24  
25 the three potential storylines indicated that an older Somali male doctor would be most suitable to  
26  
27 deliver health information in our story, as this character would evoke feelings of trust and respect.  
28  
29 Somali community members favored a scene where a Somali mother could be shown talking to her  
30  
31 doctor – this way they could see themselves as a character in the VR story and could see their questions  
32 290  
33 and concerns being addressed directly. The open-ended survey responses from community advisors  
34  
35 indicated a preference for a storyline with a strong focus on family and supported the story concept of a  
36  
37 Somali mother asking questions to a trusted physician. This information was used to develop the initial  
38  
39 script.  
40  
41

42  
43 295

44  
45 Six members of the expert advisory board reviewed the initial script. Advisors were asked to  
46  
47 answer a series of six open-ended questions and provided insightful answers that assisted with script  
48  
49 development (Table 2). Specifically, when advisors were asked for their overall impressions of the story,  
50  
51 they stated:  
52  
53  
54  
55  
56  
57  
58  
59  
60

1  
2  
3 300 “Overall, I like how the story flows and the way in which the educational components are  
4 presented.”  
5  
6  
7  
8  
9

10 “I like the simplicity of the conversation with its effective focus on the key messaging of the  
11 value of the timely vaccination to help raise healthy kids.”  
12  
13

14 305  
15  
16 We conducted a community focus group discussion during the script review process to engage  
17 the community. Seventeen community members were asked to assess how culturally appropriate the  
18 storyline was, what they would like to change, how impactful the story was, and how they would  
19 personally design the content. During this focus group discussion, participants agreed that the story was  
20 clear and easy-to-follow; however, as additional questions were asked about story flow, the feedback  
21 turned to autism. We found that even when we did not mention autism, the false association between  
22 autism and the measles, mumps, and rubella vaccine (MMR) came up as a topic of discussion. Many  
23 community members said that they were concerned about autism and the MMR vaccination. One  
24 woman asked:  
25  
26 310  
27  
28  
29  
30  
31  
32  
33  
34  
35

36 315  
37  
38 “If MMR doesn’t cause autism, why did I see my child stop talking immediately after getting the  
39 MMR?”  
40  
41  
42  
43  
44  
45

46 The participants agreed that the VR must address the autism question, and that they would prefer to  
47 learn this information from a doctor character in the VR storyline.  
48 320  
49

50 Community members were also asked to take a brief survey after reviewing the script. This  
51 survey included questions about attitudes toward vaccination as well as vaccination planning. Notably,  
52 there was an 18% increase in participants who endorsed being “very comfortable” with MMR  
53  
54  
55  
56  
57  
58  
59  
60

1  
2  
3 vaccination following script exposure. Additionally, those who said they were “not at all comfortable”  
4  
5 325 with MMR vaccination decreased by 12% following script exposure. There was also a 17% increase in  
6  
7 those who stated they would allow their child to receive the MMR following script exposure (Table 3).  
8  
9

### 12 **Phase 3: VR Prototype and iterative feedback**

14  
15 Three expert advisors provided feedback on the storyboard and prototype that focused on where  
16  
17 330 characters were positioned (i.e. husband next to wife), color scheme, and highlighted the need to describe  
18  
19 the immune system’s function in order to retain scientific accuracy in the communication of vaccination  
20  
21 information.  
22  
23

24  
25 The prototype (Figure 2) was tested with the Somali community in the context of an in-person  
26  
27 focus group discussion and surveys that took place in person at the SFS offices. Participants in the focus  
28  
29 335 group discussion were asked a series of open-ended questions about their experience with the prototype.  
30  
31 The primary focus of this discussion was analysis of the storyboards and stylistic elements of the VR  
32  
33 experience (e.g., color preferences, imagery, portrayal of characters). Participants indicated that they  
34  
35 highly valued the Somali voiceover and preferred to include the discussion of autism in the final VR  
36  
37 storyline, as its exclusion would raise more questions for the community. The participants also felt that  
38  
39 340 the father character in the VR storyline seemed somewhat excluded and should be standing near his wife  
40  
41 to signal support.  
42  
43

44  
45 All participants who reviewed the prototype agreed that the inclusion of culturally appropriate  
46  
47 characters and a Somali voiceover maximized the educational experience. 13/24 (54%) participants stated  
48  
49 that the prototype made them either more comfortable or much more comfortable with vaccination than  
50  
51 345 they were before exposure to the prototype. 20/24 (83%) participants stated that they would recommend  
52  
53 MMR vaccination to members of their community following exposure to the prototype. Additionally,  
54  
55 21/24 (88%) said they planned to vaccinate their children following exposure to the prototype.  
56  
57

1  
2  
3  
4  
5  
6 *VR design factors:* The key VR design elements that were incorporated within each phase of VR  
7  
8 350 development include passive, non-intrusive experiences, a dynamic and interactive visualization, and  
9  
10 prompts that promote the user towards self-reflection.  
11  
12  
13  
14  
15

#### 16 **Phase 4: Final Product and Testing**

17  
18  
19 The final product is a four minute 360-degree video animation (<https://youtu.be/NS8Gvtxnlk0>)  
20  
21 355 available in Somali and English languages. It can be viewed online using a tablet, a smart phone, or with  
22  
23 VR goggles. Settings include a Somali home populated by a family, and a doctors' office. In the animation's  
24  
25 introduction, we meet the expectant mother who states that she is expecting her first child and is trying  
26  
27 to make decisions about vaccination. Figure 3 illustrates in screenshots each of the 4 chapters in the VR  
28  
29 experience. We plan to test the final product using an A/B testing model with the Somali community  
30  
31  
32 360 wherein the A group receives the VR education and the B group receives a basic English-language  
33  
34 educational video about vaccination. Both groups will be surveyed before and after exposure to the  
35  
36 educational materials to assess changes in attitude toward vaccination and willingness to vaccinate.  
37  
38  
39  
40  
41  
42

#### 43 **DISCUSSION**

44  
45  
46 365 The main results of the SHIFA program can be summarized as follows: 1) a community  
47  
48 participatory research model can be effectively translated for the co-design of a VR educational program  
49  
50 with community members involved in each phase of technology development; 2) cultural and linguistic  
51  
52 sensitivities can be incorporated within a VR pediatric immunization educational program and are  
53  
54 essential factors for effective community engagement; and 3) effective VR utilization requires flexibility  
55  
56  
57  
58  
59  
60

1  
2  
3 370 that can be used among community members with varying levels of health and technology literacy. To  
4  
5 the best of our knowledge, our VR development is the first such health innovation for vaccination  
6  
7 education designed by a community of refugees known for vaccine hesitancy.  
8  
9

### 10 11 12 13 ***Refugee Learners – Vaccination & Autism*** 14

15  
16 375 This community has common barriers to effective education such as a lack of information and  
17  
18 information that is not culturally and/or linguistically appropriate to drive understanding [19]. Regarding  
19  
20 immunizations, many parents and caregivers in this community already possess medically inaccurate  
21  
22 information. We have previously determined that within this refugee community the reason not to  
23  
24 immunize has resulted from misinformation and the perception that vaccination results in autism.  
25  
26  
27 380 Although MMR vaccination rates have fallen in the Somali community (from 92% to 42% over the span of  
28  
29 a decade [7,8]) rates of autism and pediatric learning impairments have remained high (1:32 Somali  
30  
31 children have autism compared to the national average of 1:54) [20-21]. While these results do not  
32  
33 support the link between vaccination and autism, many parents are still convinced of an association  
34  
35 between MMR and autism. Given these results, it is important to take into consideration the mental and  
36  
37  
38 385 emotional state and the ideation that arises from associating vaccinations with autism. Community health  
39  
40 engagement related to immunization requires education focused on the importance of vaccinations for  
41  
42 newly arrived refugees, and a re-education among those who have previously elected not to immunize.  
43  
44  
45

46  
47 In this context, we performed a community health assessment and identified the drivers for a low  
48  
49 rate of vaccination in the Somali community ranging from cultural and language barriers, distrust in the  
50  
51 390 healthcare system, and the misinformation that vaccination results in autism. Recognizing these drivers  
52  
53 for low immunization rates in this community, our observations for the mechanisms for how VR affects  
54  
55 behavior changes include: content that is culturally relevant, stimulates an awareness and expectation for  
56  
57  
58  
59  
60

1  
2  
3 what vaccines do and do not do, and provides an immersive experience leading to information retention  
4  
5 [22].  
6  
7

8 395  
9

### 10 11 ***VR CBPR and Co-Designs*** 12 13

14 In addition to the mechanisms for how VR affects behavioral change, several design factors must  
15  
16 be maintained when considering who interacts with the VR technology, especially among immigrants that  
17  
18 may have varying levels of health and digital literacy. Within our program, most community members  
19  
20 experienced a positive interaction with VR. There are several plausible reasons for our observations.  
21 400  
22 Through community co-designs, we leveraged key design factors including a non-intrusive experience  
23  
24 (users learn in their own environment), a passive interaction (content that is visual, audio, and depicted  
25  
26 versus reading), and a dynamic storyline that builds upon previous experiences, uses known environments  
27  
28 and promotes self-reflection by allowing the user to introspect and contemplate during the VR experience.  
29  
30

31 405  
32 Because we recognized the importance of culturally and linguistically appropriate educational  
33  
34 materials to deal with issues of low health literacy and medical distrust, we included community-based  
35  
36 approaches in each phase of our development. The results of focus groups and surveys conducted within  
37  
38 the community revealed several important considerations for the development of our VR storyline. For  
39  
40 instance, community members were much more comfortable receiving information from a trusted doctor  
41  
42 character. Community members also felt it necessary to include direct and clear information about the  
43 410  
44 lack of relationship between autism and vaccination in our storyline. This was in contrast to our  
45  
46 expectation and that doing so would reinforce this misinformation. Following design workshops with the  
47  
48 Somali community, we tested the program that they helped to co-design within the community in order  
49  
50 to address its cultural and linguistic appropriateness as well as its ability to promote vaccination behavior.  
51  
52  
53 415 We also tested the VR storyline with a team of subject matter experts who evaluated the scientific  
54  
55  
56  
57  
58  
59  
60

1  
2  
3 accuracy and usability of our design. In our community testing, we found that many Somali community  
4  
5 members felt the VR storyline engendered trust, was relatable, was educational, and was convincing.  
6  
7 Several focus group and survey participants stated that they planned to vaccinate and to recommend  
8  
9 vaccination to others following exposure to the VR. Our testing with our panel of experts found that our  
10  
11  
12 420 content was user-friendly, easy to understand, and scientifically accurate.  
13  
14

15 While we appreciate that community co-designs are an important methodology for how a new  
16  
17 technology is designed, a foundation of CBPR is necessary to harness community involvement. To employ  
18  
19 CBPR, we engaged community members throughout every step of the process. Before developing the idea  
20  
21 for the VR storyline, we engaged the community in a series of three focus groups to better understand  
22  
23  
24 425 their needs, strengths, and interest in collaboration. Focus group discussion questions were open-ended  
25  
26 and allowed for participants to bring their interests and concerns into the conversation. Information  
27  
28 learned from these engagements was used to begin to develop the culturally and linguistically appropriate  
29  
30 storyline for the VR. Community members were also continuously engaged throughout the development  
31  
32 of the VR storyline through community co-design.  
33  
34

35 430 It is our plan to develop and leverage an educational curriculum in future deployments of VR. Due  
36  
37 to the constraints of COVID-19, we are currently exploring the possibilities of using telehealth and other  
38  
39 digital communication platforms to safely and effectively deploy the VR into the community. Addressing  
40  
41 vaccine hesitancy is especially relevant within the context of COVID-19, as vaccination rates for  
42  
43 preventable diseases have dropped significantly since the beginning of the COVID-19 crisis [23]. There are  
44  
45  
46 435 also concerns about the potential of misinformation related to COVID-19 vaccination that is especially  
47  
48 relevant for an underserved community that is largely excluded from vaccine clinical trials and  
49  
50 communities that have a history of vaccine hesitancy.  
51  
52  
53  
54  
55  
56  
57  
58  
59  
60



### **Limitations**

440 Our community feedback and focus groups represent a convenience sample for those that are  
more apt towards vaccine acceptance, and therefore may not completely capture all concerns among  
those who are vaccine hesitant. While this represents a potential selection bias, our method to include a  
wide range of community members as well as internal and external advisors may enhance internal validity  
445 by incorporating a heterogenous group for community input. Community-based participation and  
community co-designs at each stage of VR development from the initial idea through completion of a VR  
animation may enhance external validation by including the key components related to cultural and  
linguistic sensitives within the phased approach for VR development. COVID-19 impacted our abilities to  
recruit more participants and to test our final VR experience within the community in the way that we  
450 had initially planned to. We are attempting to mitigate this limitation by administering online surveys in  
the Somali community after they view the VR at home; however, this may limit the quality of our data as  
most individuals do not have VR headsets at home and may not get the full immersive effect without  
them. Finally, a perceived shift from vaccine hesitancy to vaccine acceptance at this point is subjective  
and requires real-world validation and prospective follow-up confirming vaccine delivery.

455

### **CONCLUSION**

We employed community-based participatory approaches, and community co-design to develop  
an innovative vaccine educational technology with Somali refugees using VR. By combining new  
technology-enabled approaches with the needs, interests, and expertise of Somali community members,  
460 we have created a methodology that can address vaccination beliefs and behaviors in a vaccine hesitant  
refugee population. Future research will include an assessment of the efficacy of the VR platform on

1  
2  
3 vaccination rates over time, as well as continued community engagement for the development of  
4  
5 additional VR content which can increase health literacy within underserved populations.  
6  
7  
8  
9

10  
11 **465 ACKNOWLEDGEMENTS**  
12  
13

14 We first extend our sincerest gratitude to the Somali community for their inspiring engagement  
15  
16 in this project. Next, we would like to thank Fadumo Jama, Ahmed Dahir, and Sahra Nor for their assistance  
17  
18 with participant recruitment, facilitation of community engagements, and translation and interpretation  
19  
20 services. Finally, we are grateful to Dr. Ahmad Bailony and Karen Henken for their guidance and input on  
21  
22  
23 **470** this project.  
24  
25  
26  
27  
28

29 **CONTRIBUTORSHIP STATEMENT**  
30  
31

32 SS, NI, and AM contributed to the collection and analysis of data for this work. SS and SB  
33  
34 contributed to the initial drafting of the manuscript. SS, NI, MS, ME, IS, MSa, AS, and SB contributed to  
35  
36 **475** the conception and design of the work. All authors (SS, NI, AM, MS, ME, IS, CF, MSa, DM, KE-M, RT, AM,  
37  
38 AL, EC, AS, and SB) contributed to the interpretation of the data, revising the work critically for important  
39  
40 intellectual content, providing final approval of the version to be published, and all agree to be  
41  
42 accountable for all aspects for the work in ensuring that questions related to the accuracy or integrity of  
43  
44 any part of the work are appropriately investigated and resolved. The funders had no role in the design  
45  
46  
47 **480** and conduct of the study; collection, management, analysis, and interpretation of the data; preparation,  
48  
49 review, or approval of the manuscript; and decision to submit the manuscript for publication.  
50  
51  
52  
53  
54  
55  
56  
57  
58  
59  
60

## COMPETING INTERESTS

485 Carrie Farrell was a paid consultant on the project from inception until August of 2019. Alex  
Marchetti is a former employee of technology partner INVIVO and her engagement with the project began  
while she was with that organization in 2018. Sanjeev Bhavnani discloses Scripps Clinic Grants for clinical  
trials related to machine learning and technology designs in cardiovascular imaging, being a Pfizer Health  
Information Technology Advisory Board member on strategies related to health information technology,  
490 being a Bristol Meyers Squibb Digital Health Advisory board member on strategies related to digital health  
technologies, being an Anthem AI Consultant on projects related to cardiovascular care, being a Proteus  
Health Chair DSMB on digital medication monitoring in hepatitis C, being an American College of  
Cardiology Innovations Advisory Group Principal investigator and committee member on various  
innovation projects in cardiovascular care, having Analytics4Life Stock options as a scientific advisor on  
495 artificial intelligence in cardiovascular diagnostics, and having Blumio Stock options as a scientific advisor  
on new technology designs in hypertension. Markie Esmailian discloses US patents in Illumesense Inc.,  
using data analytics and machine learning algorithms for clinical decision support for alternative health  
therapies. Markie Esmailian is also Founder of IllumeSense Inc. as majority shareholder and principle.  
Ibrahim Sezan discloses that he is a paid employee of Distinct Insights, LLC. Ahmed Sahid, Najla Ibrahim,  
500 and Samantha Streuli were all paid employees of Somali Family Service at the time of this research. Alia  
Mohamed was also a paid research assistant for this project. All other authors declare that they have no  
relevant or material financial interests that relate to the research described in this paper.

## FUNDING

505 Alliance Healthcare Foundation Grant #18-34728477.

1  
2  
3 **DATA SHARING STATEMENT**  
4

5  
6 Data are deidentified participant data and are available from the corresponding author upon  
7  
8 request. Reuse is not permitted.  
9

10  
11 510  
12  
13  
14  
15  
16  
17  
18  
19  
20  
21  
22  
23  
24  
25  
26  
27  
28  
29  
30  
31  
32  
33  
34  
35  
36  
37  
38  
39  
40  
41  
42  
43  
44  
45  
46  
47  
48  
49  
50  
51  
52  
53  
54  
55  
56  
57  
58  
59  
60

For peer review only

## REFERENCES

1. Nicolai T, Fuchs O, von Mutius E. Caring for the Wave of Refugees in Munich. *N Engl J Med*. 2015 Oct 22;373(17):1593-5. doi: 10.1056/NEJMp1512139. Epub 2015 Sep 23. PMID: 26397950.
- 515 2. Kumar R. Refugee Articulations of Health: A Culture-Centered Exploration of Burmese Refugees' Resettlement in the United States. *Health Commun*. 2020 Jan 13:1-11. doi: 10.1080/10410236.2020.1712035. Epub ahead of print. PMID: 31931620.
3. Westgard B, Martinson BC, Maciosek M, Brown M, Xu Z, Farah F, Ahmed O, Dalmar A, Dubois D, Sanka L, Pryce D. Prevalence of Cardiovascular Disease and Risk Factors Among Somali Immigrants and Refugees. *J Immigr Minor Health*. 2020 Sep 17. doi: 10.1007/s10903-020-01078-3. Epub 520 ahead of print. PMID: 32940817.
4. Shadmi E, Chen Y, Dourado I, Faran-Perach I, Furler J, Hangoma P, Hanvoravongchai P, Obando C, Petrosyan V, Rao KD, Ruano AL, Shi L, de Souza LE, Spitzer-Shohat S, Sturgiss E, Suphanchaimat R, Uribe MV, Willems S. Health equity and COVID-19: global perspectives. *Int J Equity Health*. 2020 525 Jun 26;19(1):104. doi: 10.1186/s12939-020-01218-z. PMID: 32586388; PMCID: PMC7316580.
5. Decoteau CL. The "Western disease": Autism and Somali parents' embodied health movements. *Soc Sci Med*. 2017 Mar;177:169-176. doi: 10.1016/j.socscimed.2017.01.064. Epub 2017 Feb 1. 39 PMID: 28171816.
6. Henneberry, S. University of Minnesota estimates autism spectrum disorder (ASD) in Somali and 530 non-Somali children in Minneapolis. Press Release. 16 Dec 2013. [https://rtc.umn.edu/autism/doc/Somali\\_Autism\\_study\\_press\\_release.pdf](https://rtc.umn.edu/autism/doc/Somali_Autism_study_press_release.pdf)
7. Dyer, O. Measles Outbreak in Somali American Community Follows Anti-Vaccine Talks. *BMJ*. 2017 50 May 16: DOI:10.1136/bmj.j2378.
8. Hviid A, Hansen JV, Frisch M, Melbye M. Measles, Mumps, Rubella Vaccination and Autism. *Ann Intern Med*. 2019;170(8):513-520. doi:10.7326/M18-2101. 535

- 1  
2  
3  
4  
5  
6  
7  
8  
9  
10  
11  
12  
13  
14  
15  
16  
17  
18  
19  
20  
21  
22  
23  
24  
25  
26  
27  
28  
29  
30  
31  
32  
33  
34  
35  
36  
37  
38  
39  
40  
41  
42  
43  
44  
45  
46  
47  
48  
49  
50  
51  
52  
53  
54  
55  
56  
57  
58  
59  
60
9. Nabulsi M, Harris J, Letelier L, Ramos K, Hopayian K, Parkin C, Porzsolt F, Sestini P, Slavin M, Summerskill W. Effectiveness of education in evidence-based healthcare: the current state of outcome assessments and a framework for future evaluations. *Int J Evid Based Healthc*. 2007 Dec;5(4):468-76. doi: 10.1111/j.1479-6988.2007.00084.x. PMID: 21631807.
- 540 10. Merchant Z, Goetz ET, Cifuentes L, Keeney-Kennicutt W, Davis TJ. Effectiveness of Virtual Reality-Based Instruction on Students' Learning Outcomes in K-12 and Higher Education: A meta-analysis. *Computers & Education*. Jan 2014. DOI: 10.1016/j.compedu.2013.07.033.
11. Psotka J. Immersive Training Systems: Virtual reality and education and training. *Instructional Science*. 1995. DOI: 10.1007/BF00896880.
- 545 12. Riva G, Baños RM, Botella C, Mantovani F, Gaggioli A. Transforming Experience: The potential for augmented reality and virtual reality for enhancing personal and clinical change. *Psychiatry*. 30 September 2016. DOI: 10.3389/fpsy.2016.00164.
13. Zhou S, Bickmore T, Paasche-Orlow M, Jack B. Agent-User Concordance and Satisfaction with a Virtual Hospital Discharge Nurse. In: Bickmore T., Marsella S., Sidner C. (eds) *Intelligent Virtual Agents*. IVA 2014. *Lecture Notes in Computer Science*, vol 8637. 2014. DOI: 10.1007/978-3-319-09767-1\_63.
- 550 14. Bhavnani SP, Narula J, Sengupta PP. Mobile technology and the digitization of healthcare. *European Heart Journal*. 7 May 2016. DOI: 10.1093/eurheartj/ehv770.
15. City Heights Demographics and Statistics. (n.d.). Retrieved October 26, 2020, from <https://www.niche.com/places-to-live/n/city-heights-san-diego-ca/residents/>
- 555 16. Fisher KE, Yefimova K, and Yafi E. Future's Butterflies: Co-Designing ICT Wayfaring Technology with Refugee Syrian Youth. In *Proceedings of the The 15th International Conference on Interaction Design and Children (IDC '16)*. 2016. DOI: 10.1145/2930674.2930701.

- 1  
2  
3 17. Israel BA, Schulz AJ, Parker EA, Becker AB. Review of community-based research: assessing  
4  
5 560 partnership approaches to improve public health. *Annu Rev Public Health*. 1998;19:173-202. doi:  
6  
7 10.1146/annurev.publhealth.19.1.173. PMID: 9611617.  
8  
9  
10 18. Miles MB, Huberman AM. *Qualitative data analysis: An expanded sourcebook*. sage; 1994 Jan 12.  
11  
12 19. Kim W, Kim I, Baltimore K, Imtiaz AS, Bhattacharya BS, Lin L. Simple contents and good readability:  
13  
14 Improving health literacy for LEP populations. *Int J Med Inform*. 2020 Jul 11;141:104230. doi:  
15  
16 565 10.1016/j.ijmedinf.2020.104230. Epub ahead of print. PMID: 32688291.  
17  
18  
19 20. Maenner MJ, Shaw KA, Baio J, et al. Prevalence of Autism Spectrum Disorder Among Children  
20  
21 Aged 8 Years — Autism and Developmental Disabilities Monitoring Network, 11 Sites, United  
22  
23 States, 2016. *MMWR Surveill Summ* 2020, 69 (No. SS-4): 1-12.  
24  
25  
26 21. Hewitt A, Hall-Lande J, Hamre K, Esler AN, Punyko J, Reichle J, Gulaid A. Autism Spectrum Disorder  
27  
28 570 (ASD) Prevalence in Somali and Non-Somali Children. *J Autism Dev Disord* 2016;2599-2608. DOI  
29  
30 10.1007/s10803-016-2793-6.  
31  
32  
33 22. Diemer J, Alpers GW, Peperkorn HM, Shiban Y, Mühlberger A. The impact of perception and  
34  
35 presence on emotional reactions: a review of research in virtual reality. *Front Psychol*. 2015;6:26.  
36  
37 Published 2015 Jan 30. doi:10.3389/fpsyg.2015.00026.  
38  
39 575 23. Santoli JM, Lindley MC, DeSilva MB, et al. Effects of the COVID-19 Pandemic on Routine Pediatric  
40  
41 Vaccine Ordering and Administration — United States, 2020. *MMWR Morb Mortal Wkly Rep*  
42  
43 2020;69:591–593. DOI: <http://dx.doi.org/10.15585/mmwr.mm6919e2external icon>.  
44  
45  
46  
47  
48  
49  
50  
51 580  
52  
53  
54  
55  
56  
57  
58  
59  
60

**TABLE 2. Questions and Responses from Project Advisors**

| Questions Asked to Advisors | Salient Responses |
|-----------------------------|-------------------|
|-----------------------------|-------------------|

## TABLES

**TABLE 1. Focus Group Questions and Responses from Somali Community**

| Category and Questions for Community Members                                               | Salient Responses                                                                                                                                                                                                                                                                                                                                                                                                                        |
|--------------------------------------------------------------------------------------------|------------------------------------------------------------------------------------------------------------------------------------------------------------------------------------------------------------------------------------------------------------------------------------------------------------------------------------------------------------------------------------------------------------------------------------------|
| <b>Session 1: General Health</b>                                                           |                                                                                                                                                                                                                                                                                                                                                                                                                                          |
| <b>Examples of questions asked in focus groups</b>                                         |                                                                                                                                                                                                                                                                                                                                                                                                                                          |
| “What are some of your community’s biggest health concerns in the U.S.?”                   | <p>“Autism.”</p> <p>“One of the biggest health problems that people have that I forgot to mention is that most people don't understand a lot of English.”</p>                                                                                                                                                                                                                                                                            |
| “What do you find not trustworthy within the health care system?”                          | <p>“Lack of good communication...especially in primary language.”</p> <p>“Health insurance!”</p>                                                                                                                                                                                                                                                                                                                                         |
| <b>Session 2: Pediatric Health</b>                                                         |                                                                                                                                                                                                                                                                                                                                                                                                                                          |
| <b>Examples of Questions asked in focus groups</b>                                         |                                                                                                                                                                                                                                                                                                                                                                                                                                          |
| “Do you trust your doctor’s recommendations for your child’s health?”                      | <p>“Yes, whatever recommendation the doctor gives me, I have to take it.”</p> <p>“I mean I always think it's obviously for a good reason, but for me, I think I always do my own research before I automatically assume that's what's best for me. If it's something very serious like [the doctor] saying for example 'you need a surgery,' that [I] automatically would be like 'let me get another opinion from another doctor.’”</p> |
| <b>Session 3: Vaccination</b>                                                              |                                                                                                                                                                                                                                                                                                                                                                                                                                          |
| <b>Examples of questions asked in focus groups</b>                                         |                                                                                                                                                                                                                                                                                                                                                                                                                                          |
| “What are the topics or things that you would like to know about in relation to vaccines?” | <p>“If they could show how the vaccine works in the child’s body and what it does – if it can be visualized.”</p> <p>“That before the vaccines are given to our children, for it to be explained to us what the risks are - the sided effects, and the benefits. When we compare the two, then make a decision.”</p>                                                                                                                     |

**Table 1:** Sample questions and salient responses from exploratory focus groups indicated that parents were very concerned about autism and that they found it difficult to trust the healthcare system due to lack of communication in their primary language. While parents trusted certain doctors, they also highlighted the importance of doing their own research to understand their children’s health. Parents also expressed a desire to understand how vaccines work within the body and what the risks and benefits are of vaccination.



|                                                                                                                                                                    |                                                                                                                                                                                                                                                                                                                                                |
|--------------------------------------------------------------------------------------------------------------------------------------------------------------------|------------------------------------------------------------------------------------------------------------------------------------------------------------------------------------------------------------------------------------------------------------------------------------------------------------------------------------------------|
| <p>1) What are your overall impressions of the story? What did you like the most about the story? Is there anything that you think should change in the story?</p> | <p>“Overall, I like how the story flows and the way in which the educational components are presented. I also think it’s a great idea to have the story centered around a meal, as it seems culturally relevant and helps make the situation relatable to users.”</p>                                                                          |
| <p>2) Have you noticed any inaccuracies in scientific and medical facts in the story?</p>                                                                          | <p>“Based on my past feedback, I am glad that this story has been selected. I like the simplicity of the conversation with its effective focus on the key messaging of the value of the timely vaccination to help raise healthy kids.”</p>                                                                                                    |
| <p>3) Was the story clear and easy to understand? Did the story flow naturally?</p>                                                                                | <p>“No.”</p> <p>“No, from my knowledge all of the content presented is accurate.”</p>                                                                                                                                                                                                                                                          |
| <p>4) Was the story culturally appropriate? Was the cultural component balanced throughout?</p>                                                                    | <p>“Very clear and flowed in a way we would use in teaching in general. Very logical progression of information.”</p> <p>“Yes, the story is clear and flows very naturally.”</p>                                                                                                                                                               |
| <p>5) Was the story convincing? Does it have a potential to change attitudes of vaccine hesitant parents?</p>                                                      | <p>“One of the things I liked about this story is the emphasis of the great Somali family bond that can be pivotal in achieving the goals of this project to leverage the great trust Somali parents put on their relative and educated community members.”</p> <p>“Yes, the story was culturally relevant and appropriate.”</p>               |
| <p>6) In your opinion, does the story increase knowledge?</p>                                                                                                      | <p>“I think it gives the information about immunization, the science behind it, and does not focus on the controversies, which have not been supported by medical data.”</p> <p>“Yes. I would just make sure we really take advantage of VR when we show the visuals inside the body and how vaccine’s function within the immune system.”</p> |
| <p>6) In your opinion, does the story increase knowledge?</p>                                                                                                      | <p>“Yes, it stays with the facts in a positive way, in a healthy environment with the families.”</p> <p>“It can, depending on the background of the parents and audience and their desire to benefit from such educational program.”</p>                                                                                                       |

590

**Table 2:** Sample questions and salient responses from engagement with project advisors. Advisors enjoyed the clarity and flow of the storyline as well as finding it culturally relevant and appropriate. They also believed that the story had significant potential to increase vaccine knowledge.

**TABLE 3: Survey following initial script exposure**

| How comfortable are you with MMR vaccination? | %   | How comfortable are you with MMR vaccination? | %    | Would you get MMR for your child? | %   | Would you get MMR for your child? | %    |
|-----------------------------------------------|-----|-----------------------------------------------|------|-----------------------------------|-----|-----------------------------------|------|
| Very comfortable                              | 52% | Very comfortable                              | 70%+ | Yes, I would                      | 65% | Yes, I would                      | 82%+ |
| Somewhat comfortable                          | 24% | Somewhat comfortable                          | 18%- | I would consider it               | 23% | I would consider it               | 12%- |
| Not at all comfortable                        | 24% | Not at all comfortable                        | 12%- | I don't know                      | 6%  | I don't know                      | 0%-  |
|                                               |     |                                               |      | No, I would not                   | 6%  | No, I would not                   | 6%   |

595

**Table 3:** This table shows the results of a survey of 17 Somali mothers following exposure to the initial script for the VR. + indicates % increased following exposure to the script, - indicates % decreased following exposure to the script.

600

605

610

**FIGURES**

1  
2  
3  
4  
5  
6  
7  
8  
9  
10  
11 615 **Figure 1:** Phased approach to VR development. Assessment of community needs began in April 2019 in  
12 advance of the development of the VR. Iterative testing took place throughout 2019 and 2020, with some  
13 gaps in testing due to the restrictions of the COVID-19 pandemic. The final VR product has been completed  
14 as of June 2020 and is currently being tested with the Somali community.

15  
16  
17  
18 620 **Figure 2:** Still frame from prototype. The prototype consisted of a motion storyboard with a voiceover  
19 which was translated into Somali for presentation to the community.

20  
21  
22  
23  
24  
25  
26  
27 625 **Figure 3:** Top row: Chapters 1 and 2 of the VR story. Bottom row: Chapters 3 and 4 of the VR story. In  
28 chapter 1 of the animation, the expectant mother, her husband, and her sister visit the doctor's office  
29 and learn about measles, mumps, and rubella (MMR). In chapter 2, the family learns how the immune  
30 system works. In chapter 3, the family learns from the doctor what the MMR vaccine does and how it  
31 works. In Chapter 4, the doctor explains to the family the risks and benefits of MMR vaccination,  
32 including a statement debunking the association between autism and vaccination. Finally, the 360-  
33 630 degree video concludes by showing the new mother and her family – including the new, healthy baby –  
34 and the new mother states that after learning all the facts, she has decided to vaccinate her child.  
35  
36  
37  
38  
39  
40  
41  
42  
43  
44  
45  
46  
47  
48  
49  
50  
51  
52  
53  
54  
55  
56  
57  
58  
59  
60



Phased approach to VR development. Assessment of community needs began in April 2019 in advance of the development of the VR. Iterative testing took place throughout 2019 and 2020, with some gaps in testing due to the restrictions of the COVID-19 pandemic. The final VR product has been completed as of June 2020 and is currently being tested with the Somali community.

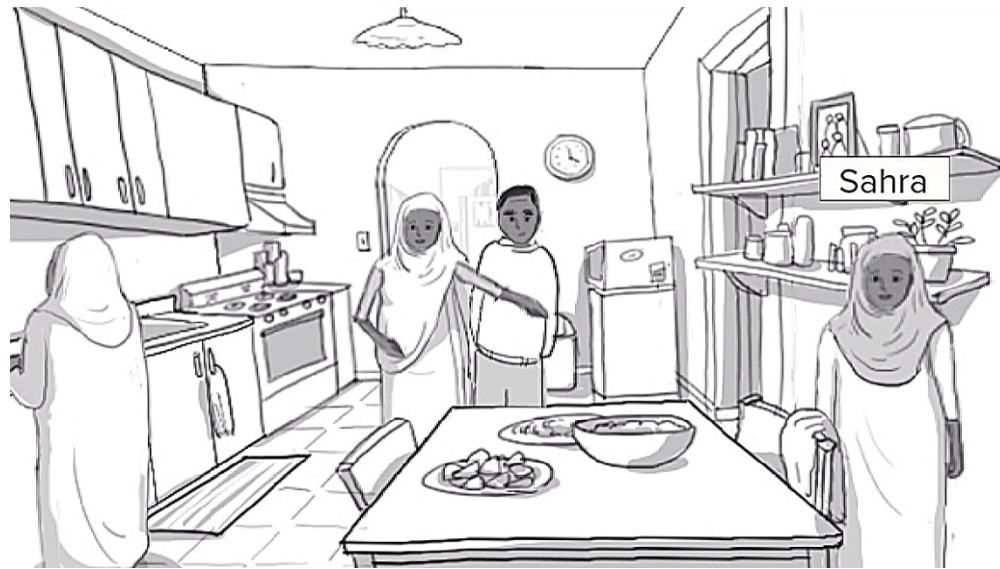

Still frame from prototype. The prototype consisted of a motion storyboard with a voiceover which was translated into Somali for presentation to the community.



Top row: Chapters 1 and 2 of the VR story. Bottom row: Chapters 3 and 4 of the VR story. In chapter 1 of the animation, the expectant mother, her husband, and her sister visit the doctor's office and learn about measles, mumps, and rubella (MMR). In chapter 2, the family learns how the immune system works. In chapter 3, the family learns from the doctor what the MMR vaccine does and how it works. In Chapter 4, the doctor explains to the family the risks and benefits of MMR vaccination, including a statement debunking the association between autism and vaccination. Finally, the 360-degree video concludes by showing the new mother and her family – including the new, healthy baby – and the new mother states that after learning all the facts, she has decided to vaccinate her child.

### **Focus Group 1 Discussion Guide**

#### **Questions about health in Somalia and refugee camps:**

1. Q: What was your opinion of healthcare in Somalia?
2. Q: Did you receive health education (in Somalia)? What kind?
3. Q: If you spent time in a refugee camp, were you provided health services there?
4. Q: What kind of health services did you receive in Somalia (e.g. preventative, emergency, obstetric, etc.)?

#### **Questions about resettlement process**

1. Q: Were you provided with health services and/or screening as part of the resettlement process?
2. Q: Were you provided with health education as part of the resettlement process? What kind?
3. Q: If you have children, were you offered healthcare services for your children? What kind?

#### **Questions about healthcare in the US**

1. Q: What kinds of healthcare services have you received in the US (e.g. preventative, emergency, obstetric, etc.)?
2. Q: For what health conditions are you most likely to seek medical care?
3. Q: Where do you go for healthcare services?
4. Q: If you have children, what kind of healthcare services have they received?
5. Q: Have you received health education or information (in the US)? (From whom, about what?)
6. Q: What are some of your community's biggest health concerns in the US? Mental (or Autism)? Physical? Chronic Conditions?
7. Q: Who is the decision-maker in your household for health care?
8. Q: What sources of information do you use to make healthcare-related decisions? (e.g. family, friends, religious leaders, doctors, healthcare workers)
9. Q: Do you trust your healthcare provider and his/her guidance/recommendations?

10. Q: Is there any part/aspect of the healthcare system in the US that you do not find completely trustworthy?
11. Q: Who does your community (not just you) go to for healthcare? (who is trusted?) Are there specific hospitals people go to?

---

## **Focus Group 2 Discussion Guide**

### **Introductory Questions**

1. Do you have children (under 18 years old)? How many? What are their ages?

### **Prenatal Health Questions**

1. If you've had children, did you experience your pregnancies here in the United States?
2. What is prenatal care? What do you know about prenatal care?
3. How do you feel about c-sections? (I ask because women seem to bring this up a lot and it is mentioned often in literature around Somali women's birth experiences in Western countries)
4. What did you learn through prenatal care that was valuable to your child rearing?
5. Where did you give birth? Where do mothers in your family or friends give birth?

### **Pediatric Health Questions**

1. What do you know about pediatric (infant and childhood) health? Where do you get information about pediatric health (friends, family, internet, social media, doctors, etc.)?
2. How do you make decision about your child's healthcare?
3. Do What does the phrase "stages of development" mean to you? (If they're not sure we could explain and then ask the next part) What do you think the "stages of development" for children are? When do they happen?
4. Where do people learn about stages of development?
5. Who (or where) do your children go to see for healthcare?
6. When do you take your children to their doctor? How old are they typically? Yearly visits? How often? (routine preventive care, health and developmental guidance, screening for health conditions, treatment of acute and chronic conditions, and injury care)
7. What is a healthy child?



- 1
  - 2
  - 3
  - 4
  - 5
  - 6
  - 7
  - 8
  - 9
  - 10
  - 11
  - 12
  - 13
  - 14
  - 15
  - 16
  - 17
  - 18
  - 19
  - 20
  - 21
  - 22
  - 23
  - 24
  - 25
  - 26
  - 27
  - 28
  - 29
  - 30
  - 31
  - 32
  - 33
  - 34
  - 35
  - 36
  - 37
  - 38
  - 39
  - 40
  - 41
  - 42
  - 43
  - 44
  - 45
  - 46
  - 47
  - 48
  - 49
  - 50
  - 51
  - 52
  - 53
  - 54
  - 55
  - 56
  - 57
  - 58
  - 59
  - 60
8. What type of problems or challenges have you experienced with your own children when it comes to their health? What about in your community?
9. What barriers might prevent you from seeking or accessing healthcare for your children?
10. Do you have any advice or tips for young mothers and their young children when it comes to their healthcare?
11. If you were to watch educational video about pediatric health, how would you prefer to access or watch that?
12. How would you like to receive information about infant and child health in the future? (maybe give some options like using technology, watching videos, attending health fairs, attending workshops, formal classes, advice from doctors, etc.)
- 

### **Focus Group 3 Discussion Guide**

#### **Questions about Vaccine Knowledge and Attitudes:**

1. From your understanding, what are vaccinations for? What are their benefits? How do they work?
2. Do you understand how the vaccination works in your body?
3. Are vaccines effective against diseases/illnesses?
4. What information have you received about vaccinations and where?
5. Do you feel that the information you received was enough to make a good decision?
6. What information is missing that you would like to know about vaccination?
7. Do you feel like you get better information about vaccinations when you have a translator or someone like this present?
8. When did you first get vaccinated?
9. When did your children first get vaccinated? Why did you vaccinate them (i.e. school requirement)?
10. Why did you vaccinate (did school, doctors tell you?)
9. Why did you vaccinate in the US?
10. Where did you get vaccinated?

- 1  
2  
3 11. If you were not told by a doctor or school to get vaccinated (prompted by someone else), would you  
4 still vaccinate your children and why?  
5  
6  
7 12. As you might know, vaccines are conducted based on a schedule (based on age of child) – what are  
8 your thoughts about the schedule? Frequency of the shots children are getting?  
9  
10 13. What do you think about frequency, amount, timing of shots?  
11  
12 14. Have you heard of parents delaying vaccinations for their children?  
13

14 **Questions about Anti-Vaccination:**

- 15  
16  
17 15. Have you heard the recent news about disease outbreaks in the US caused by unvaccinated  
18 children?  
19  
20 16. If so, where did you hear that information? What are your thoughts about that?  
21  
22 17. What are reasons people decline vaccinations?  
23  
24 18. Are vaccines related to or a cause of any illness (besides autism)?  
25  
26 19. Do you know others in the community who are hesitant about vaccinations?  
27  
28

29 **Questions about Technology:**

- 30  
31 20. If we were to create something educational for you and your community, what would be the best  
32 way to teach?  
33  
34 21. If you were to design the VR program what would you do or show?  
35  
36 22. What kinds of experiences would you like to see? How vaccines work? Simulated interaction with  
37 healthcare provider?  
38  
39  
40  
41
- 

42  
43  
44 **Script Review Focus Group Discussion Guide**

- 45  
46 1) What were your overall impressions of the script?  
47  
48 2) Does the script have the potential to impact your community's beliefs about autism and vaccination?  
49  
50 3) What did you like about the script?  
51  
52 4) What would you change about the script?  
53  
54 5) Is there anyone or anything that you think is missing from the script?  
55
-

## Parent Interview Guide

### Introductory Questions:

1. How old are you?
2. Do you have children? How many children do you have?
3. Are you married?
4. How long have you been in the US?

### Interview Questions:

1. Where or who do you generally get your medical information from? Why?
2. What is autism?
3. From your understanding, what causes autism?
4. Do you know anyone in your community who has autism?

#### If their child:

1. Were you familiar with autism prior to your child's diagnosis?
  2. What signs or behaviors have caused you to seek medical help for your child?
  3. Can you explain the process of receiving an autism diagnosis for your child?
  4. What challenges have you faced as a parent of an autistic child?
  5. What challenges has your child faced as a child with autism?
  6. What treatments have you used to manage your child's autism?
5. How do people in your community view or understand autism?
  6. Is there anything you would like to know or understand about autism?
  7. How do you feel about vaccinations?
  8. Would you, or have you, vaccinated your children? Why did you make that choice?
    - Have you been made aware that vaccination and immunization records are now required for children to attend school in San Diego? How do you feel about that?
  9. How do you think other members of your community feel about vaccination?
    - What concerns or fears do other members of your community may have about vaccination?

- 1  
2  
3  
4 10. Do you know anyone in the Somali community in San Diego who has chosen not to vaccinate?  
5 Why? Do you think they would be willing to speak with us?  
6  
7  
8 11. Do you feel like you've been provided enough information about vaccinations to make an  
9 informed decision?
- 10 • Do you feel like members of your community are provided with enough information  
11 about vaccination to make an informed decision?  
12
- 13 12. If you've changed your mind about vaccinations at any point, do you recall what that deciding  
14 factor was? If you haven't changed your mind (or if you are still anti-vaccination or hesitant),  
15 what may change your mind?  
16  
17
- 18 13. What would you like to know or understand about vaccinations?
- 19 • What do you think members of your community would like to know or understand  
20 about vaccinations?  
21
- 22 14. What do you know about Virtual Reality? Have you ever used it?
- 23 • Would you feel comfortable using VR for an education program? Do you think  
24 members of your community would be comfortable using VR?  
25
  - 26 • Do you have any questions about Virtual Reality?  
27
- 28  
29 15. What other formats would be best for developing a health education program for your  
30 community? (video, game, lecture, workshop, discussion)?  
31  
32
- 33 16. Is there anything else you think we should know or consider?  
34  
35 0. Any questions for me?  
36  
37  
38  
39  
40  
41  
42  
43  
44  
45  
46  
47  
48  
49  
50  
51  
52  
53  
54  
55  
56  
57  
58  
59  
60

## Standards for Reporting Qualitative Research (SRQR)\*

<http://www.equator-network.org/reporting-guidelines/srqr/>

Page/line no(s).

### Title and abstract

|                                                                                                                                                                                                                                                              |        |
|--------------------------------------------------------------------------------------------------------------------------------------------------------------------------------------------------------------------------------------------------------------|--------|
| <p><b>Title</b> - Concise description of the nature and topic of the study Identifying the study as qualitative or indicating the approach (e.g., ethnography, grounded theory) or data collection methods (e.g., interview, focus group) is recommended</p> | Page 1 |
| <p><b>Abstract</b> - Summary of key elements of the study using the abstract format of the intended publication; typically includes background, purpose, methods, results, and conclusions</p>                                                               | Page 3 |

### Introduction

|                                                                                                                                                                     |                 |
|---------------------------------------------------------------------------------------------------------------------------------------------------------------------|-----------------|
| <p><b>Problem formulation</b> - Description and significance of the problem/phenomenon studied; review of relevant theory and empirical work; problem statement</p> | Page 6          |
| <p><b>Purpose or research question</b> - Purpose of the study and specific objectives or questions</p>                                                              | Page 7 Line 102 |

### Methods

|                                                                                                                                                                                                                                                                                                                                                                                                             |                                                                                                                                                                                                                                                                                                                                                                    |
|-------------------------------------------------------------------------------------------------------------------------------------------------------------------------------------------------------------------------------------------------------------------------------------------------------------------------------------------------------------------------------------------------------------|--------------------------------------------------------------------------------------------------------------------------------------------------------------------------------------------------------------------------------------------------------------------------------------------------------------------------------------------------------------------|
| <p><b>Qualitative approach and research paradigm</b> - Qualitative approach (e.g., ethnography, grounded theory, case study, phenomenology, narrative research) and guiding theory if appropriate; identifying the research paradigm (e.g., postpositivist, constructivist/interpretivist) is also recommended; rationale**</p>                                                                             | <p>Page 8 line 120</p> <p>Page 9 line 160</p> <p>We employed CBPR and community co-design in order to develop educational content that was created by and for the communities for whom it was intended. We used focus groups, interviews, and surveys in order to triangulate our data and to include the voices of the community in as many ways as possible.</p> |
| <p><b>Researcher characteristics and reflexivity</b> - Researchers' characteristics that may influence the research, including personal attributes, qualifications/experience, relationship with participants, assumptions, and/or presuppositions; potential or actual interaction between researchers' characteristics and the research questions, approach, methods, results, and/or transferability</p> | Page 8 Line 121                                                                                                                                                                                                                                                                                                                                                    |
| <p><b>Context</b> - Setting/site and salient contextual</p>                                                                                                                                                                                                                                                                                                                                                 | Page 8 Line 135                                                                                                                                                                                                                                                                                                                                                    |

|                                                                                                                                                                                                                                                                                                                                                                                                                                                                                                                                                                                                                                                                    |                                                                                                                                                                                                                                                                                                                                                                                                                                                                                                                                                                                                                                                                                                                                   |
|--------------------------------------------------------------------------------------------------------------------------------------------------------------------------------------------------------------------------------------------------------------------------------------------------------------------------------------------------------------------------------------------------------------------------------------------------------------------------------------------------------------------------------------------------------------------------------------------------------------------------------------------------------------------|-----------------------------------------------------------------------------------------------------------------------------------------------------------------------------------------------------------------------------------------------------------------------------------------------------------------------------------------------------------------------------------------------------------------------------------------------------------------------------------------------------------------------------------------------------------------------------------------------------------------------------------------------------------------------------------------------------------------------------------|
| factors; rationale**                                                                                                                                                                                                                                                                                                                                                                                                                                                                                                                                                                                                                                               |                                                                                                                                                                                                                                                                                                                                                                                                                                                                                                                                                                                                                                                                                                                                   |
| <p>1</p> <p>2 <b>Sampling strategy</b> - How and why research</p> <p>3 participants, documents, or events were</p> <p>4 selected; criteria for deciding when no further</p> <p>5 sampling was necessary (e.g., sampling</p> <p>6 saturation); rationale**</p> <p>7</p> <p>8</p> <p>9</p> <p>10</p> <p>11</p> <p>12</p> <p>13</p> <p>14</p> <p>15</p> <p>16</p> <p>17</p> <p>18</p> <p>19</p> <p>20</p>                                                                                                                                                                                                                                                             | <p>Page 8 line 125.</p> <p>Somali community members were chosen in the manner that they were because we recognize the importance of including the entire community in research. There is a strong oral tradition in Somali culture and parents often ask advice from extended family and community when making decisions about healthcare. Thus, we found it necessary to engage individuals of all ages and genders who spoke English and Somali to guide the educational material and provide their input.</p> <p>Expert advisors were chosen in order to provide us with another view of the issue from a technical angle so that we could better create something that could be realistically delivered to the community.</p> |
| <p>21 <b>Ethical issues pertaining to human subjects</b> -</p> <p>22 Documentation of approval by an appropriate</p> <p>23 ethics review board and participant consent,</p> <p>24 or explanation for lack</p> <p>25 thereof; other confidentiality and data security</p> <p>26 issues</p> <p>27</p>                                                                                                                                                                                                                                                                                                                                                                | <p>Page 9 Line 150</p>                                                                                                                                                                                                                                                                                                                                                                                                                                                                                                                                                                                                                                                                                                            |
| <p>28 <b>Data collection methods</b> - Types of data</p> <p>29 collected; details of data collection procedures</p> <p>30 including (as appropriate) start and stop dates</p> <p>31 of data collection and analysis, iterative</p> <p>32 process, triangulation of sources/methods, and</p> <p>33 modification of procedures in response to</p> <p>34 evolving study findings; rationale**</p> <p>35</p> <p>36</p> <p>37</p> <p>38</p> <p>39</p> <p>40</p> <p>41</p> <p>42</p> <p>43</p> <p>44</p> <p>45</p> <p>46</p> <p>47</p> <p>48</p> <p>49</p> <p>50</p> <p>51</p> <p>52</p> <p>53</p> <p>54</p> <p>55</p> <p>56</p> <p>57</p> <p>58</p> <p>59</p> <p>60</p> | <p>Page 10 Line 180</p> <p>We collected data via focus groups, interviews, and surveys in order to triangulate data. We also wanted to reach as many community members as possible so we engaged people online, at the offices of the nonprofit organization, and at community health fairs.</p>                                                                                                                                                                                                                                                                                                                                                                                                                                  |

|                                              |                                                                                                                                                                                                                                                       |                                                                                                                                                          |
|----------------------------------------------|-------------------------------------------------------------------------------------------------------------------------------------------------------------------------------------------------------------------------------------------------------|----------------------------------------------------------------------------------------------------------------------------------------------------------|
| 1<br>2<br>3<br>4<br>5<br>6<br>7<br>8<br>9    | <b>Data collection instruments and technologies</b> - Description of instruments (e.g., interview guides, questionnaires) and devices (e.g., audio recorders) used for data collection; if/how the instrument(s) changed over the course of the study | Interview and focus group discussion guides were included as supplementary files. Types of questions asked are also described throughout the manuscript. |
| 10<br>11<br>12<br>13<br>14<br>15<br>16<br>17 | <b>Units of study</b> - Number and relevant characteristics of participants, documents, or events included in the study; level of participation (could be reported in results)                                                                        | Number of participants is described throughout the paper at each relevant event (n of focus group participants etc.)                                     |
| 18<br>19<br>20<br>21                         | <b>Data processing</b> - Methods for processing data prior to and during analysis, including transcription, data entry, data management and security, verification of data integrity, data coding, and anonymization/de-identification of excerpts    | Line 206                                                                                                                                                 |
| 22<br>23<br>24<br>25                         | <b>Data analysis</b> - Process by which inferences, themes, etc., were identified and developed, including the researchers involved in data analysis; usually references a specific paradigm or approach; rationale**                                 | Line 213                                                                                                                                                 |
| 26<br>27<br>28<br>29                         | <b>Techniques to enhance trustworthiness</b> - Techniques to enhance trustworthiness and credibility of data analysis (e.g., member checking, audit trail, triangulation); rationale**                                                                | Line 221                                                                                                                                                 |

### Results/findings

|                                        |                                                                                                                                                                                                   |                                                                                                   |
|----------------------------------------|---------------------------------------------------------------------------------------------------------------------------------------------------------------------------------------------------|---------------------------------------------------------------------------------------------------|
| 31<br>32<br>33<br>34<br>35             | <b>Synthesis and interpretation</b> - Main findings (e.g., interpretations, inferences, and themes); might include development of a theory or model, or integration with prior research or theory | Described beginning on line 226.                                                                  |
| 36<br>37<br>38<br>39<br>40<br>41<br>42 | <b>Links to empirical data</b> - Evidence (e.g., quotes, field notes, text excerpts, photographs) to substantiate analytic findings                                                               | Quotes included in tables; figures included to show experience created and assessed by community. |

### Discussion

|                                              |                                                                                                                                                                                                                                                                                                                                                                                                             |          |
|----------------------------------------------|-------------------------------------------------------------------------------------------------------------------------------------------------------------------------------------------------------------------------------------------------------------------------------------------------------------------------------------------------------------------------------------------------------------|----------|
| 44<br>45<br>46<br>47<br>48<br>49<br>50<br>51 | <b>Integration with prior work, implications, transferability, and contribution(s) to the field</b> - Short summary of main findings; explanation of how findings and conclusions connect to, support, elaborate on, or challenge conclusions of earlier scholarship; discussion of scope of application/generalizability; identification of unique contribution(s) to scholarship in a discipline or field | Line 366 |
| 52<br>53                                     | <b>Limitations</b> - Trustworthiness and limitations of findings                                                                                                                                                                                                                                                                                                                                            | Line 442 |

### Other

|                                        |                                                                                                                                               |          |
|----------------------------------------|-----------------------------------------------------------------------------------------------------------------------------------------------|----------|
| 54<br>55<br>56<br>57<br>58<br>59<br>60 | <b>Conflicts of interest</b> - Potential sources of influence or perceived influence on study conduct and conclusions; how these were managed | Line 487 |
|----------------------------------------|-----------------------------------------------------------------------------------------------------------------------------------------------|----------|

1  
2  
3  
4  
5  
6  
7  
8  
9  
10  
11  
12  
13  
14  
15  
16  
17  
18  
19  
20  
21  
22  
23  
24  
25  
26  
27  
28  
29  
30  
31  
32  
33  
34  
35  
36  
37  
38  
39  
40  
41  
42  
43  
44  
45  
46  
47  
48  
49  
50  
51  
52  
53  
54  
55  
56  
57  
58  
59  
60

|                                                                                                                          |          |
|--------------------------------------------------------------------------------------------------------------------------|----------|
| <b>Funding</b> - Sources of funding and other support; role of funders in data collection, interpretation, and reporting | Line 506 |
|--------------------------------------------------------------------------------------------------------------------------|----------|

\*The authors created the SRQR by searching the literature to identify guidelines, reporting standards, and critical appraisal criteria for qualitative research; reviewing the reference lists of retrieved sources; and contacting experts to gain feedback. The SRQR aims to improve the transparency of all aspects of qualitative research by providing clear standards for reporting qualitative research.

For peer review only



1  
2  
3  
4  
5  
6  
7  
8  
9  
10  
11  
12  
13  
14  
15  
16  
17  
18  
19  
20  
21  
22  
23  
24  
25  
26  
27  
28  
29  
30  
31  
32  
33  
34  
35  
36  
37  
38  
39  
40  
41  
42  
43  
44  
45  
46  
47  
48  
49  
50  
51  
52  
53  
54  
55  
56  
57  
58  
59  
60

\*\*The rationale should briefly discuss the justification for choosing that theory, approach, method, or technique rather than other options available, the assumptions and limitations implicit in those choices, and how those choices influence study conclusions and transferability. As appropriate, the rationale for several items might be discussed together.

**Reference:**

O'Brien BC, Harris IB, Beckman TJ, Reed DA, Cook DA. **Standards for reporting qualitative research: a synthesis of recommendations.** *Academic Medicine*, Vol. 89, No. 9 / Sept 2014  
DOI: [10.1097/ACM.0000000000000388](https://doi.org/10.1097/ACM.0000000000000388)

For peer review only
